# Supplementary material
Source: PubMed Central journal article supplement (PMC5115273)
Supplement: NIHMS795287-supplement-1.pdf [file NIHMS795287-supplement-1.pdf]

**MIDA boronates are hydrolysed fast and slow by two different mechanisms**

Jorge A. Gonzalez,<sup>a</sup> O. Maduka Ogba,<sup>b</sup> Gregory F. Morehouse,<sup>c</sup> Nicholas Rosson,<sup>b</sup> Kendall N. Houk,<sup>d</sup> Andrew G. Leach,<sup>e</sup> Paul H.-Y. Cheong,<sup>b\*</sup>  
Martin D. Burke,<sup>c\*</sup> and Guy C. Lloyd-Jones<sup>a\*</sup>

a) EaStCHEM, School of Chemistry, University of Edinburgh, Edinburgh, EH9 3FJ, UK

b) Department of Chemistry, Oregon State University, Corvallis, OR 97331, USA

c) Department of Chemistry University of Illinois 454 RAL, Box 52-5 600 South Mathews Avenue Urbana, IL 61801, USA

d) Department of Chemistry and Biochemistry, University of California, Los Angeles, 607 Charles E. Young Drive East, Los Angeles, CA 90095-1569, USA

e) School of Pharmacy and Biomolecular Sciences, Liverpool John Moores University, Byrom Street, Liverpool, L3 3AF, UK

\*e-mail: paulc@science.oregonstate.edu  
mdburke@illinois.edu  
and  
guy.lloyd-jones@ed.ac.uk

|             | <b>Contents</b>                                           | <b>Page</b> |
|-------------|-----------------------------------------------------------|-------------|
| <b>I</b>    | <b>General methods</b>                                    | <b>2</b>    |
| <b>II</b>   | <b>Synthesis</b>                                          | <b>4</b>    |
| <b>III</b>  | <b>NaOH titrations of 1a</b>                              | <b>17</b>   |
| <b>IV</b>   | <b>pH profile for hydrolysis of Me-MIDA in buffer</b>     | <b>19</b>   |
| <b>V</b>    | <b><sup>18</sup>O incorporations under conditions A-G</b> | <b>22</b>   |
| <b>VI</b>   | <b>Neutral hydrolysis kinetics and KIEs</b>               | <b>26</b>   |
| <b>VII</b>  | <b>Base-mediated hydrolysis kinetics and KIEs</b>         | <b>38</b>   |
| <b>VIII</b> | <b>Acid Mediated hydrolysis kinetics and KIEs</b>         | <b>46</b>   |
| <b>IX</b>   | <b>Test for "open-1a"</b>                                 | <b>49</b>   |
| <b>XI</b>   | <b>T1 measurements and quantitation</b>                   | <b>53</b>   |
| <b>XII</b>  | <b>NMR Spectra</b>                                        | <b>55</b>   |
| <b>XIII</b> | <b>Computational details</b>                              | <b>68</b>   |
| <b>XIV</b>  | <b>References</b>                                         | <b>117</b>  |

## I. General methods

### Materials and Experimental Methods

Reactions which are specified in the text below as having been carried out under nitrogen were conducted using conventional Schlenk-line technique, purging three times with nitrogen vacuum cycles in oven- or flame-dried glassware. When anhydrous solvents were used (Et<sub>2</sub>O, THF, DCM, PhMe, MeCN, EtOH), these were obtained from an M-Braun SPS system. H<sub>2</sub>O was freshly distilled without further treatment unless except where specified.

Reagents and materials purchased from commercial suppliers were used without further purification except where specified.

Flash chromatography was carried out on columns packed with E. Merck silica gel (40-63 µm). Compounds were detected by UV (254 nm) or KMnO<sub>4</sub>.

### Stopped-Flow UV-vis Spectroscopy

UV spectra were recorded on an Ocean-Optics USB400 Miniature Fiber Optic Spectrometer fitted with a DH2000-BALUV lamp (deep-UV deuterium and tungsten halogen lamps), solarised resistant grade optical fibres. A Hi-Tech Scientific SFA-20 rapid kinetics stopped-flow accessory attached to a quartz 1.0 cm-path cuvette was used for rapid mixing. Reagents were load in two independent 2.5 mL syringes and then mixing induced by a pneumatic drive at constant air pressure (5 bar). UV-vis analysis were performed with a 200-600 nm spectral window. Data were analysed with 3.5 version of kinetic studio software (TgK Scientific).

### NMR Spectroscopy

NMR spectra were acquired on JEOL Lambda 300, JEOL Eclipse Bruker and JEOL Eclipse 400 spectrometers at School of Chemistry, University of Bristol, and Bruker AVIII 400, AVIII 500 and AVIII 600 spectrometers with nitrogen or helium cryoprobes at School of Chemistry at the University of Edinburgh. Chemical shifts are quoted in parts per million (ppm) or parts per billion (ppb). <sup>1</sup>H and <sup>13</sup>C NMR spectra are referenced to residual protonated solvent.<sup>1</sup> <sup>2</sup>H spectra were externally referenced to neat Si(CD<sub>3</sub>)<sub>4</sub>, <sup>10</sup>B and <sup>11</sup>B

spectra to  $\text{BF}_3\cdot\text{OEt}_2$  in  $\text{CDCl}_3$ ,  $^{15}\text{N}$  spectra to  $\text{CH}_3\text{NO}_2$  in  $\text{CDCl}_3$ , and  $^{19}\text{F}$  spectra to neat  $\text{CFCl}_3$ ,  $^{15}\text{N}$  spectra to  $\text{CH}_3\text{NO}_2$  in  $\text{CDCl}_3$ . The following format is used to report data: chemical shift in ppm (multiplicity, J values (coupling constant(s)) in Hz, integral value). Multiplicities of peaks are reported as s (singlet), d (doublet), t (triplet), q (quartet).

### **Mass spectrometry**

High resolution mass spectra were recorded on a Bruker microTOF II spectrometer by the mass spectrometry service at the University of Edinburgh.

## II. Synthesis

The general route used to install the isotopic labels ( $^{10}\text{B}$ ,  $^{11}\text{B}$ ,  $^{13}\text{C}$ ,  $^{15}\text{N}$ ,  $^2\text{H}$ ) is outlined below.

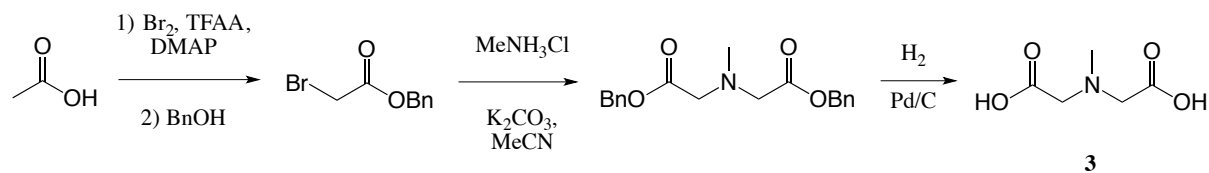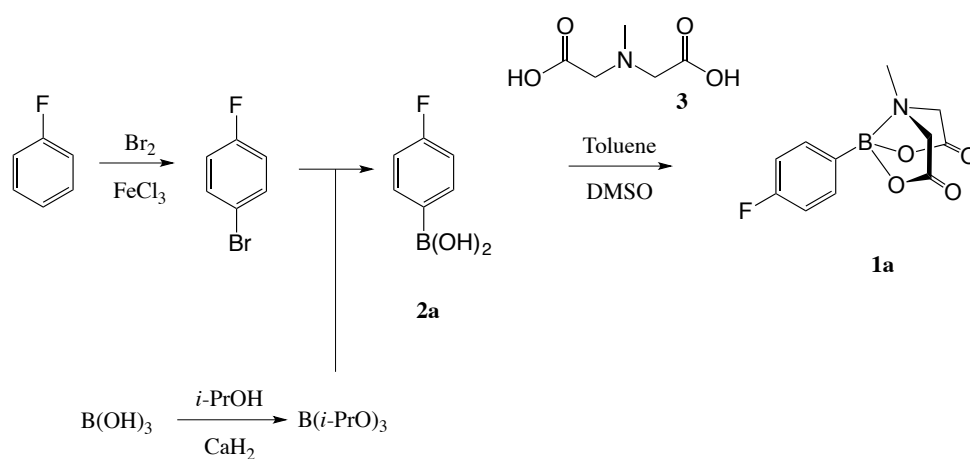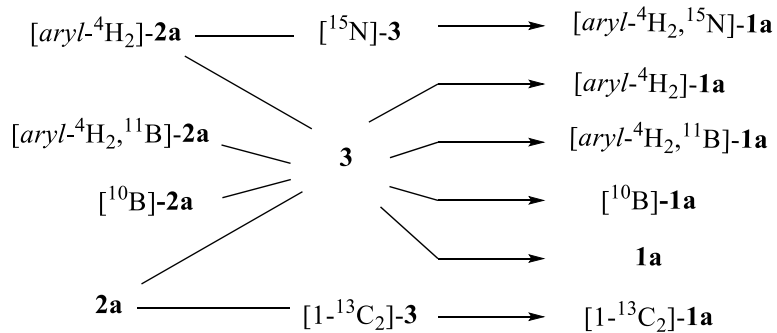

## Isotopic enrichments

| Compound                                                                                                                            | Isotope enrichment                                | Method                    |
|-------------------------------------------------------------------------------------------------------------------------------------|---------------------------------------------------|---------------------------|
| 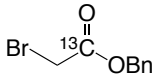                                                   | >98.5 % $^{13}\text{C}$                           | $^1\text{H}$ NMR          |
|                                                    | > 98.5 % $^{13}\text{C}_2$                        | $^1\text{H}$ NMR          |
|                                                    | > 98.0 % $^{15}\text{N}$                          | MS                        |
|                                                    | > 95.0 % $^{13}\text{C}_2$                        | MS                        |
|                                                    | > 97.0 % $^{15}\text{N}$                          | MS                        |
|                                                   | > 97.2 % $\text{D}_4$                             | MS                        |
| <br>[ $^{10}\text{B}$ ]-1a                       | > 98.7 % $^{11}\text{B}$                          | MS                        |
| <br>[aryl- $^2\text{H}_4$ , $^{11}\text{B}$ ]-1a | > 97.1 % $\text{D}_4$<br>> 98.7 % $^{11}\text{B}$ | $^{19}\text{F}$ NMR<br>MS |
| <br>[aryl- $^2\text{H}_4$ , $^{11}\text{B}$ ]-1a | > 98.7 % $^{13}\text{C}_2$                        | MS                        |
| <br>[aryl- $^2\text{H}_4$ , $^{15}\text{N}$ ]-1a | > 97.2 % $\text{D}_4$<br>> 98.0 % $^{15}\text{N}$ | $^{19}\text{F}$ NMR<br>MS |
| <br>[aryl- $^2\text{H}_4$ ]-1a                   | > 97.3 % $\text{D}_4$                             | $^{19}\text{F}$ NMR       |

**Benzyl bromoacetate**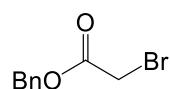

A flame-dried, 50 mL, three neck round-bottomed flask equipped with a magnetic stirrer bar was charged with AcOH (1.0 g, 16.7 mmol, 1.0 equiv), TFAA (5.72 g, 27.2 mmol, 1.7 equiv), and DMAP (20.0 mg, 0.164 mmol, 0.010 equiv). The system was adapted with a thermometer, a dropping funnel with pressure compensation, and a condenser in reflux position before stirring and warming up at 60 °C for 10 min in an oil bath. Then Br<sub>2</sub> (2.75 g, 17.2 mmol, 1.0 equiv) was added dropwise over 90 min through the dropping funnel. The reaction was heated for an additional 90 min, and then cooled down to room temperature. A flow of N<sub>2</sub> was used to flush out the HBr produced and remaining Br<sub>2</sub>, which were quenched with a gas trap. Then, BnOH (10.3 g, 95.2 mmol, 5.95 equiv) was added and the reaction mixture was stirred for 19 h at 60 °C. After cooling to room temperature, the reaction mixture was poured into a solution of NaHCO<sub>3</sub> (10 mL). Then, Et<sub>2</sub>O (20 mL) was added to reaction mixture and the phases were separated. The aqueous phase was extracted with Et<sub>2</sub>O (3 x 15 mL). The combined organic phases were washed with saturated aqueous solution of NaHCO<sub>3</sub> (10 mL), saturated Na<sub>2</sub>S<sub>2</sub>O<sub>3</sub> (10 mL) and finally H<sub>2</sub>O (10 mL). The organic layer was dried with MgSO<sub>4</sub> and the solvent was removed in *in vacuo*. The residue was purified on silica column (Hexanes/ AcOH 95:5) to afford benzyl bromoacetate as a pale yellow liquid (3.280 g, 14.3 mmol, yield 86 %). The <sup>1</sup>H and <sup>13</sup>C NMR data were consistent with the structure of this compound.<sup>2</sup>

This material was carried forward into further reactions without additional purification.

R<sub>f</sub> (Hex/AcOEt 6:1 v/v)= 0.50 (UV lamp).

<sup>1</sup>H NMR (500 MHz, CDCl<sub>3</sub>): δ(ppm)= 7.40-7.34 (m, 5H), 5.21 (s, 2H), 3.88 (s, 2H).

<sup>13</sup>C{<sup>1</sup>H} NMR (126 MHz, CDCl<sub>3</sub>): δ(ppm)= 167.2 (s), 135.1 (s), 128.81 (s), 128.75 (s), 128.5 (s), 68.1 (s), 25.9 (s).

**Benzyl [1-<sup>13</sup>C]-bromoacetate**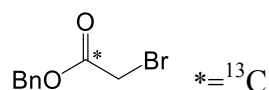

The general procedure was used with [1-<sup>13</sup>C]-AcOH (3.0 g, 49.2 mmol, 1 equiv), DMAP (0.060 g, 0.49 mmol, 0.010 equiv), and TFAA (17.16 g, 81.7 mmol, 1.66 equiv). Br<sub>2</sub> (8.24g, 51.6 mmol, 1.05 equiv) was added dropwise over 90 min at 60 °C. Upon complete addition, the mixture was stirred for 90 min, BnOH (31.35 g, 290 mmol, 5.9 equiv) was added and heated at 60 °C for 18 h and subsequently quenched with saturated NaHCO<sub>3</sub> aqueous solution (10 mL). After addition of Et<sub>2</sub>O (45 mL) and extraction of the aqueous layer with Et<sub>2</sub>O (3 x 30 mL), the organic phase was dried with MgSO<sub>4</sub>. The solvent was distilled off in *vacuo* to give a yellow liquid. The crude product that was purified on silica column (Hexanes/AcOH 95:5) to give benzyl [1-<sup>13</sup>C]-bromoacetate as a pale yellow liquid (8.833 g, 38.4 mmol, yield 78%)

The <sup>1</sup>H and <sup>13</sup>C NMR data were consistent with the structure of this compound <sup>3</sup>

This material was carried forward into further reactions without additional purification.

R<sub>f</sub>(Hex:AcOEt 6:1 v/v)= 0.5 (UV lamp).

<sup>1</sup>H NMR (500 MHz, CDCl<sub>3</sub>): δ(ppm)= 7.40-7.33 (m, 5H), 5.21 (d, <sup>3</sup>J<sub>H-C</sub>= 3.2 Hz, 2H), 3.88 (d, <sup>2</sup>J<sub>H-C</sub>= 4.8 Hz, 2H).

<sup>13</sup>C{<sup>1</sup>H} NMR (126 MHz, CDCl<sub>3</sub>): δ(ppm)= 167.20 (s), 135.12 (d, <sup>3</sup>J<sub>C-C</sub>= 2.0 Hz), 128.81 (s), 128.76 (s), 128.5 (s), 68.1 (d, <sup>2</sup>J<sub>C-C</sub>= 2.4 Hz), 25.9 (d, <sup>1</sup>J<sub>C-C</sub>= 65.5 Hz).

**Dibenzyl [1-<sup>13</sup>C<sub>2</sub>] N-methyliminodiacetate**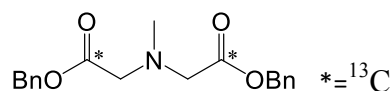

A flame-dried, 100 mL, two neck round-bottomed flask equipped with a magnetic stirrer bar was charged with MeNH<sub>2</sub>HCl (0.911 g, 13.5 mmol, 1 equiv), K<sub>2</sub>CO<sub>3</sub> (11.054 g, 80.0 mmol, 5.9 equiv). The flask was sealed with a rubber septum and subsequently purged three times via nitrogen / vacuum cycles. Then, dry MeCN (25 mL) was added to the flask before starting

the stirring. Benzyl [1-<sup>13</sup>C]-bromoacetate (5.674 g, 24.7 mmol, 1.83 equiv) was dissolved in dry MeCN in a septum-sealed vial and the solution transferred *via* cannula to the reaction mixture. The system was lowered into a 50 °C oil bath and stirred overnight for 20 h. After cooling down to room temperature, the mixture was vacuum filtered through celite and rinsed with AcOEt (3 x 10 mL). The filtrate was concentrated *in vacuo*. The residue was absorbed onto Celite and loaded onto a silica-gel column. Elution with hexanes/AcOEt (5:2) gave dibenzyl *N*-[1-<sup>13</sup>C<sub>2</sub>] methyliminodiacetate (3.567 g, 10.8 mmol, yield 88%) as a pale yellow liquid. The <sup>1</sup>H and <sup>13</sup>C NMR data were consistent with the structure of this compound. This material was carried forward into further reactions without additional purification.

R<sub>f</sub>(AcOEt)= 0.71(UV lamp).

<sup>1</sup>H NMR (500 MHz, CDCl<sub>3</sub>): δ(ppm)= 7.38-7.31 (m, 10H), 5.15 (d, <sup>3</sup>J<sub>H-C</sub>= 3.1 Hz, 4H), 3.58 (d, <sup>2</sup>J<sub>H-C</sub>= 5.3 Hz, 4H), 2.56 (s, 3H).

<sup>13</sup>C{<sup>1</sup>H} NMR (126 MHz, CDCl<sub>3</sub>): δ(ppm)= 170.7 (s), 135.8 (d, <sup>3</sup>J<sub>C-C</sub>= 2 Hz), 128.7 (s), 128.50 (s), 128.48 (s), 66.5 (d, <sup>2</sup>J<sub>C-C</sub>= 2.4 Hz), 57.2 (dd, <sup>1</sup>J<sub>C-C</sub>= 59.7, <sup>2</sup>J<sub>C-C</sub>= 2.0 Hz), 42.3 (t, <sup>3</sup>J<sub>C-C</sub>= 1.4 Hz).

#### Dibenzyl [<sup>15</sup>N]-*N*-methyliminodiacetate

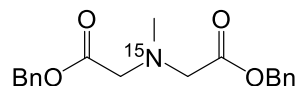

The general procedure was used with benzyl bromoacetate (3.1058 g, 13.6 mmol, 2.47 equiv), K<sub>2</sub>CO<sub>3</sub> (4.598g, 33.7 mmol, equiv 6.1 equiv), CH<sub>3</sub><sup>15</sup>NH<sub>2</sub>·HCl (0.380 g, 5.5 mmol, 1equiv) and MeCN (20 mL) to afford dibenzyl [<sup>15</sup>N]-*N*-methyliminodiacetate (1.8016 g, 5.5 mmol, yield 94%) as a pale yellow liquid. The <sup>1</sup>H and <sup>13</sup>C NMR data were consistent with the structure of this compound. This material was carried forward into further reactions without additional purification.

R<sub>f</sub>(AcOEt)= 0.69 (UV lamp).

<sup>1</sup>H NMR (400 MHz, CDCl<sub>3</sub>): δ(ppm)= 7.38-7.30 (m, 10H), 5.16 (s, 4H), 3.58 (s, 4H), 2.56 (s, 3H).

<sup>13</sup>C{<sup>1</sup>H} NMR (100 MHz, CDCl<sub>3</sub>): δ(ppm)= 170.7 (d, <sup>3</sup>J<sub>C-N</sub>= 2.5 Hz), 135.8 (s), 128.7 (s), 128.5 (s), 128.47 (s), 66.5 (s), 57.3 (d, <sup>1</sup>J<sub>C-N</sub>= 6.8 Hz), 42.3 (d, <sup>1</sup>J<sub>C-N</sub>= 5.9 Hz).



$^{15}\text{N}$  NMR (126 MHz,  $\text{CDCl}_3$ ):  $\delta(\text{ppm})= 171$  (s).

**[1- $^{13}\text{C}_2$ ]-*N*-methyliminodiacetic acid (3)**

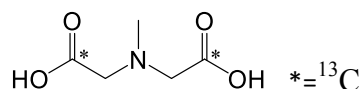

[1- $^{13}\text{C}_2$ ]-**3**: dibenzyl *N*-[1- $^{13}\text{C}_2$ ] methyliminodiacetate (2.762 g, 8.4 mmol, 1 equiv) and 50 mL of EtOH were charged to an oven-dried, 100 mL, round-bottomed flask with a magnetic stirrer and sealed with a rubber septum.  $\text{N}_2$  was bubbled through the solution for 15 minutes via an needle, with a vent needle placed through the septum. 10% w/w Pd/C (0.315 g, 0.30 mmol, 0.026 equiv) was added quickly to the reaction mixture. With vigorous stirring, an  $\text{H}_2$  balloon was used to bubble  $\text{H}_2$  through the suspension with the needle immersed in the solution alongside the vent needle, for 10 minutes. The outlet needle was removed and the inlet needle was moved to a position above the mixture. The reaction was stirred for 24 hours at room temperature. The  $\text{H}_2$  balloon was removed, and  $\text{N}_2$  used to purge the remaining hydrogen from the suspension. The mixture was vacuum filtered, rinsing with EtOH (3x5 mL) and the solid was dissolved in 30 mL of  $\text{H}_2\text{O}$ . The solution was filtered to remove the Pd/C, and then concentrated in *vacuo* to approximately 3-5 mL. Then, 20 mL of acetone was added and the flask was cooled in a water-ice bath to precipitate a white solid. The solid was vacuum filtered and dried overnight to afford [1- $^{13}\text{C}_2$ ] *N*-methyliminodiacetic acid [1- $^{13}\text{C}_2$ ]-**3** (1.132 g, 7.59 mmol, yield 91%) as a white solid.

**m.p.:** 213-215  $^\circ\text{C}$  (dec)

$^1\text{H}$  NMR (500 MHz,  $\text{D}_2\text{O}$ ):  $\delta(\text{ppm})= 4.02$  (d,  $^2J_{\text{H-C}}= 5.4$  Hz, 4H), 3.04 (s, 3H).

$^{13}\text{C}\{^1\text{H}\}$  NMR (126 MHz,  $\text{D}_2\text{O}$ ):  $\delta(\text{ppm})= 169.10$  (s), 57.26 (d,  $^1J_{\text{C-C}}= 55.3$  Hz), 42.6 (s).

**HRMS** (m/z):  $[\text{M}]^+$  calcd. for  $\text{C}_3^{13}\text{C}_2\text{H}_9\text{O}_4\text{N}$ , 149.05932; found, 149.06059

$^1\text{H}$  and  $^{13}\text{C}$  NMR shifts are consistent with those of the unlabelled compound.<sup>4</sup>

**[<sup>15</sup>N]-N-methyliminodiacetic acid**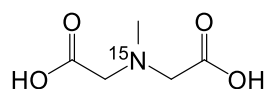

[<sup>15</sup>N]-**3**: The general procedure was followed using dibenzyl [<sup>15</sup>N]-N-methyliminodiacetate (1.295 g, 3.9 mmol, 1 equiv), 10 % w/w Pd/C (0.171 g, 0.16 mmol, 0.041 equiv), and EtOH (25 mL) to afford [<sup>15</sup>N]-methyliminodiacetic acid [<sup>15</sup>N]-**3** (0.354 g, 2.4 mmol, 60 % yield).

**m.p.:** 213-215 °C (dec).

**<sup>1</sup>H NMR** (500 MHz, D<sub>2</sub>O): δ(ppm)= 4.00 (s, 4H), 3.02 (s, 3H).

**<sup>13</sup>C{<sup>1</sup>H} NMR** (126 MHz, D<sub>2</sub>O): δ(ppm)= 169.11 (s), 57.24 (d, <sup>1</sup>J<sub>C-N</sub>= 6.6 Hz), 42.5 (d, <sup>1</sup>J<sub>C-N</sub>= 5.6 Hz).

**<sup>15</sup>N NMR** (500 MHz, D<sub>2</sub>O): δ(ppm)= 43.5 (s).

**HRMS** (m/z): [M]<sup>+</sup> calcd. for C<sub>5</sub>H<sub>9</sub>O<sub>4</sub><sup>15</sup>N, 148.04964; found, 148.05081.

<sup>1</sup>H and <sup>13</sup>C NMR shifts are consistent with those of the unlabelled compound.<sup>4</sup>

**[aryl-<sup>2</sup>H<sub>4</sub>]-4-bromofluorobenzene**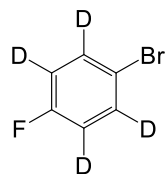

Using a previously reported procedure,<sup>5</sup> 4-fluorobenzene-d<sub>5</sub> (2.620g, 25.9 mmol, 1 equiv) and FeCl<sub>3</sub> (0.125 g, 0.77 mmol, .030 equiv) in 2.5 mL of DCM was cooled to 10-14 °C, and Br<sub>2</sub> (4.34 g, 27.2 mmol, 1.05 equiv) in 3.5 mL of DCM added dropwise over 60 min with vigorous stirring. After 4 h, mixture was washed with water (3x6 mL), saturated aqueous Na<sub>2</sub>S<sub>2</sub>O<sub>3</sub> (3x6 mL), and water (3x6mL). The aqueous layer was extracted with DCM (3x10 mL) and the combined organic phases dried over MgSO<sub>4</sub>. The solvent was removed *in vacuo* (760 mbar, 40 °C, 1 h.). The residue was distilled at 450-450 mbar, collecting the fraction at 60-67 °C to afford 4-[<sup>2</sup>H<sub>4</sub>]-bromofluorobenzene as a pale yellow liquid (3.450 g, 19.3 mmol,

yield 74%). The  $^2\text{H}$ ,  $^{19}\text{F}$  and  $^{13}\text{C}$  NMR shifts are consistent with the structure of this compound.<sup>5</sup>

$^2\text{H}$  NMR (61.4 MHz,  $\text{CDCl}_3$ ):  $\delta(\text{ppm})= 7.52$  (s, 2D), 7.04 (s, 2D).

$^{13}\text{C}\{^1\text{H}\}$  NMR (101 MHz,  $\text{CDCl}_3$ ):  $\delta(\text{ppm})= 162.0$  (d,  $^1J_{\text{C-F}} = 246.7$  Hz), 132.70 (td,  $^1J_{\text{C-D}} = 25.9$  Hz,  $^3J_{\text{C-F}} = 8.6$  Hz), 117.01 (td,  $^1J_{\text{C-D}} = 25.9$  Hz,  $^2J_{\text{C-F}} = 22.9$  Hz), 116.4 (s).

$^{19}\text{F}$  NMR (377 MHz,  $\text{CDCl}_3$ )  $\delta(\text{ppm})= -115.9$  (s).

HRMS (m/z):  $[\text{M}]^+$  calcd. for  $\text{C}_6^2\text{H}_4^{79}\text{BrF}$ , 177.97260; found, 177.97177.

#### 4- $^{2}\text{H}_4$ -fluorophenyl boronic acid

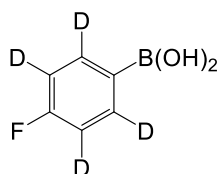

$^{2}\text{H}_4$ -**2a**: Using a previously reported procedure,<sup>5</sup> 4- $^{2}\text{H}_4$ -bromofluorobenzene (1.760 g, 9.8 mmol, 1 equiv), in 20 mL of toluene and 5 mL of THF at  $-80$  °C was treated with 6.5 mL of *n*-BuLi (1.6 M, 10.4 mmol, 1.06 equiv) over 30 minutes. The mixture was stirred for an additional 60 min. This solution was transferred to a solution of freshly distilled  $\text{B}(\text{O}-i\text{Pr})_3$  (1.990 g, 10.6 mmol, 1.08 equiv) in 40 mL of  $\text{Et}_2\text{O}$  at  $-70$  °C. The mixture was stirred for one hour and warmed to room temperature. 15 mL of HCl (2 M) was added, the organic phase separated and the aqueous layer extracted with  $\text{Et}_2\text{O}$  (3x20 mL). The combined organic layers were dried with  $\text{MgSO}_4$ , and the volatiles removed in *vacuo*. The solid was recrystallized from water and vacuum-dried to afford 4- $^{2}\text{H}_4$ -fluorophenyl boronic acid  $^{2}\text{H}_4$ -**2a** (0.449 g, 3.1 mmol, 0.316g). The product also contains some boroxine.  $^2\text{H}$ ,  $^{11}\text{B}$ ,  $^{19}\text{F}$  and  $^{13}\text{C}$  NMR shifts are consistent with the structure of this compound.<sup>5</sup>

$^2\text{H}$ -NMR (61.4 MHz, DMSO):  $\delta(\text{ppm})= 7.9$  (s, 2D), 7.2 (s, 2D).

$^{11}\text{B}$ -NMR (96 MHz, DMSO- $d_6$ ):  $\delta(\text{ppm})= 27.5$  (s).

$^{13}\text{C}\{^1\text{H}, ^2\text{H}\}$ -NMR (101 MHz, DMSO- $d_6$ ):  $\delta(\text{ppm})= 164.2$  (d,  $^1J_{\text{C-F}} = 246.9$  Hz), 136.6 (d,  $^3J_{\text{C-F}} = 8.0$  Hz), 134.5 (s), 114.4 (d,  $^2J_{\text{C-F}} = 19.4$  Hz).

$^{19}\text{F}$ -NMR (377 MHz, DMSO- $d_6$ ):  $\delta(\text{ppm})= -111.4$  (s).

**4-[<sup>2</sup>H<sub>4</sub>, <sup>11</sup>B]-fluorophenylboronic acid**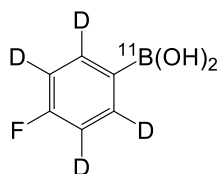

[<sup>2</sup>H<sub>4</sub>, <sup>11</sup>B]-**2a**: Using the above procedure with 4-[<sup>2</sup>H<sub>4</sub>]-bromofluorobenzene (1.096 g, 6.1 mmol) and <sup>11</sup>B(O-*i*Pr)<sub>3</sub> (1.260 g, 6.69 mmol, 1.08 equiv) gave [<sup>2</sup>H<sub>4</sub>, <sup>11</sup>B]-**2a** (0.7121 g, 5.7 mmol, 93 % yield). The <sup>2</sup>H, <sup>11</sup>B, <sup>13</sup>C and <sup>19</sup>F NMR shifts are consistent with that expected based on data for the same compound with natural abundance <sup>10</sup>B/<sup>11</sup>B (20/80).<sup>5</sup> NB [<sup>10</sup>B]-**2a** has been prepared previously by us,<sup>5</sup> and samples were used for the current study.

<sup>2</sup>H NMR (61.4 MHz, DMSO): δ(ppm)= 7.9 (s, 2D), 7.2 (s, 2D).

<sup>11</sup>B NMR (160 MHz, DMSO-*d*<sub>6</sub>): δ(ppm)= 28.2 (s, 1B).

<sup>13</sup>C{<sup>1</sup>H} NMR (126 MHz, DMSO-*d*<sub>6</sub>): δ(ppm)= 163.7 (d, <sup>1</sup>J<sub>C-F</sub>= 245.5 Hz), the other signals were broad.

<sup>19</sup>F NMR (471 MHz, DMSO-*d*<sub>6</sub>): δ (ppm)= -111.5 (s).

**4-[aryl-<sup>2</sup>H<sub>4</sub>]-MIDA boronate**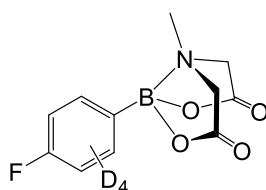

[aryl-<sup>2</sup>H<sub>4</sub>]-**1a**: As a general procedure, [aryl-<sup>2</sup>H<sub>4</sub>]-**2a** (0.274 g, 1.90 mmol, 1 equiv) and **3** (0.316 g, 2.1 mmol, 1.11 equiv) were placed in a 50 mL round-bottomed flask with a magnetic stirrer. Then, toluene (30 mL) and DMSO (3 mL) were added. A Dean-Stark apparatus was connected to the reaction flask alongside a condenser in reflux position and the mixture heated at 115-120 °C for approximately 16 h. The reaction was cooled to room temperature, the toluene removed *in vacuo*, and the residue added to cold water (10 mL, 5-10 °C). The solid that formed was collected by vacuum-filtration, dissolved in MeCN and then

loaded onto silica-gel column. Elution with Et<sub>2</sub>O/MeCN (4:1 v/v), after removal of the solvent the product was recrystallized from MeCN/Et<sub>2</sub>O to afford [*aryl*-<sup>2</sup>H<sub>4</sub>]-**2a** as a crystalline white solid (0.419 g, 1.64 mmol, yield 86 %).

**m.p.:** 218-221 °C.

**R<sub>f</sub>**(AcOEt)= 0.33 (UV lamp).

**<sup>1</sup>H NMR** (500 MHz, DMSO-d<sub>6</sub>): δ(ppm)= 4.33 (d, <sup>2</sup>J<sub>H-H</sub>= 17.2 Hz, 2H), 4.11 (d, <sup>2</sup>J<sub>H-H</sub>= 17.2 Hz, 2H), signal of CH<sub>3</sub>- is obscured by overlap with DMSO-d<sub>6</sub>-n.

**<sup>13</sup>C{<sup>1</sup>H} NMR** (101 MHz, DMSO-d<sub>6</sub>): δ(ppm)= 163.7 (d, <sup>1</sup>J<sub>C-F</sub>= 243 Hz), 134.4-134.(m), 114.4-113.9 (m), 61.78 (s), 47.54 (s), broad C-B signal not observed.

**<sup>11</sup>B NMR** (160 MHz, DMSO-d<sub>6</sub>): δ(ppm)= 11.1 (s).

**<sup>15</sup>N NMR** (50.7 MHz, DMSO-d<sub>6</sub>): δ(ppm)= 49.3 (s).

**<sup>19</sup>F NMR** (471 MHz, DMSO-d<sub>6</sub>): δ(ppm)= -113.6 (s).

**HRMS** (m/z): [M]<sup>+</sup> calcd for C<sub>11</sub>H<sub>7</sub><sup>2</sup>H<sub>4</sub>O<sub>4</sub>N<sup>11</sup>BF, 255.10108; found, 255.10098.

### [<sup>10</sup>B]-MIDA boronate

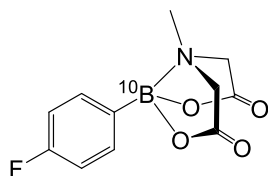

[<sup>10</sup>B]-**1a**: The general procedure was followed with [<sup>10</sup>B]-**2a** (0.549 g, 3.95 mmol, 1 equiv), **3** (0.780 g, 5.30 mmol, 1.34 equiv), toluene (40 mL), and DMSO (4 mL). After purification, [<sup>10</sup>B]-**1a** (0.807 g, 3.27 mmol, yield 83 %) was obtained as a white crystalline solid.

**m.p.:** 218-221 °C.

**R<sub>f</sub>**(AcOEt)= 0.33 (UV lamp).

**<sup>1</sup>H NMR** (500 MHz, DMSO-*d*<sub>6</sub>): δ(ppm)= 7.47 (dd, <sup>3</sup>*J*<sub>H-H</sub>= 8.6 Hz, <sup>4</sup>*J*<sub>H-F</sub>= 6.3 Hz, 2H), 7.17 (dd, <sup>3</sup>*J*<sub>H-F</sub>= 9.5 Hz, <sup>3</sup>*J*<sub>H-H</sub>= 8.6, 2H), 4.33 (d, <sup>2</sup>*J*<sub>H-H</sub>= 17.2 Hz, 2H), 4.11 (d, <sup>2</sup>*J*<sub>H-H</sub>= 17.2 Hz, 2H), the CH<sub>3</sub> signal is obscured by overlap with DMSO-*d*<sub>6-n</sub>.

**<sup>13</sup>C{<sup>1</sup>H} NMR** (126 MHz, DMSO-*d*<sub>6</sub>): δ(ppm)= 169.3 (s), 162.9 (d, <sup>1</sup>*J*<sub>C-F</sub>= 245.2 Hz), 134.6 (d, <sup>3</sup>*J*<sub>C-F</sub>= 7.8 Hz), 114.5 (d, <sup>2</sup>*J*<sub>C-F</sub>= 19.7 Hz), 61.8 (s), 47.6 (s), broad C-B signal not observed.

**<sup>10</sup>B-NMR** (54 MHz, DMSO-*d*<sub>6</sub>): δ(ppm)= 11.2 (s).

**<sup>19</sup>F NMR** (471 MHz, DMSO-*d*<sub>6</sub>): δ(ppm)= -113.0 (s).

**HRMS** (m/z): [M]<sup>+</sup> calcd. for C<sub>11</sub>H<sub>11</sub>O<sub>4</sub>N<sup>10</sup>BF, 250.07960; found, 250.07908.

#### 4-[*aryl*-<sup>2</sup>H<sub>4</sub>, <sup>11</sup>B]-MIDA boronate

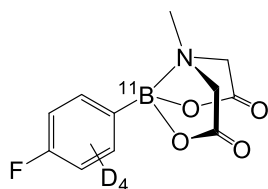

[*aryl*-<sup>2</sup>H<sub>4</sub>, <sup>11</sup>B]-**1a**: The general procedure was followed with [*aryl*-<sup>2</sup>H<sub>4</sub>, <sup>11</sup>B]-**2a** (0.517 g, 3.60 mmol, 1 equiv), **3** (0.703 g, 4.78 mmol, 1.33 equiv), toluene (40 mL), and DMSO (4 mL). After purification, [*aryl*-<sup>2</sup>H<sub>4</sub>, <sup>11</sup>B]-**1a** (0.700 g, 2.74 mmol, yield 76 %) was obtained as a white crystalline solid.

**m.p.**: 218-221 °C.

**R<sub>f</sub>**(AcOEt)= 0.33 (UV lamp).

**<sup>1</sup>H-NMR** (500 MHz, DMSO-*d*<sub>6</sub>): δ(ppm)= 4.34 (d, <sup>2</sup>*J*<sub>H-H</sub>= 17.2 Hz, 2H), 4.11(d, <sup>2</sup>*J*<sub>H-H</sub>= 17.2 Hz, 2H), signal of CH<sub>3</sub>- is obscured by overlap with DMSO-*d*<sub>6-n</sub>.

**<sup>13</sup>C{<sup>1</sup>H}-NMR** (126 MHz, DMSO-*d*<sub>6</sub>): δ(ppm)= 169.3 (s), 162.9 (d, <sup>1</sup>*J*<sub>C-F</sub>=246.5 Hz), 134.4-134.0 (m), 114.5-113.8 (m), 61.8 (s), 47.5 (s), broad C-B signal not observed.

**<sup>11</sup>B-NMR** (160 MHz, DMSO-*d*<sub>6</sub>): δ(ppm)= 11.1 (s).

**<sup>19</sup>F-NMR** (471 MHz, DMSO-*d*<sub>6</sub>): δ(ppm)= -113.6 (s).

**HRMS** (m/z): [M]<sup>+</sup> calcd. for C<sub>11</sub>H<sub>7</sub><sup>2</sup>H<sub>4</sub>O<sub>4</sub>N<sup>11</sup>BF, 255.10108; found, 255.10142.

**[1-<sup>13</sup>C<sub>2</sub>]-MIDA boronate**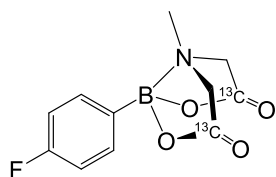

[1-<sup>13</sup>C<sub>2</sub>]-**1a**: The general procedure was followed with **2a** (0.554 g, 3.90 mmol, 1.03 equiv), [1-<sup>13</sup>C<sub>2</sub>]-**3** (0.562 g, 3.77 mmol, 1.0 equiv), toluene (40 mL), and DMSO (4.5 mL). After purification, [1-<sup>13</sup>C<sub>2</sub>]-**1a** (0.692 g, 2.46 mmol, yield 63 %) was obtained as a white crystalline solid.

**m.p.**: 217-220 °C.

**R<sub>f</sub>**(AcOEt)= 0.35 (UV lamp).

**<sup>1</sup>H-NMR** (500 MHz, DMSO-*d*<sub>6</sub>): δ(ppm)= 7.47 (dd, <sup>3</sup>*J*<sub>H-H</sub>= 8.3 Hz, <sup>4</sup>*J*<sub>H-F</sub>= 6.3 Hz, 2H), 7.17 (dd, <sup>3</sup>*J*<sub>H-F</sub>= 9.5 Hz, <sup>3</sup>*J*<sub>H-H</sub>= 8.6), 4.33 (dd, <sup>2</sup>*J*<sub>H-H</sub>= 17.2 Hz, <sup>2</sup>*J*<sub>H-C</sub>= 5.0 Hz, 2H), 4.11 (dd, <sup>2</sup>*J*<sub>H-H</sub>= 17.2 Hz, <sup>2</sup>*J*<sub>H-C</sub>= 5.0 Hz, 2H), signal of CH<sub>3</sub>- is obscured by overlap with residual solvent.

**<sup>13</sup>C{<sup>1</sup>H}-NMR** (126 MHz, DMSO-*d*<sub>6</sub>): δ(ppm)= 169.3 (s), 163.0 (d, <sup>1</sup>*J*<sub>C-F</sub>= 245.2 Hz), 134.6 (d, <sup>3</sup>*J*<sub>C-F</sub>= 7.8 Hz), 114.5 (d, <sup>2</sup>*J*<sub>C-F</sub>= 20.0 Hz), 61.8 (d, <sup>1</sup>*J*<sub>C-C</sub>= 53.1 Hz), 47.6 (t, <sup>2</sup>*J*<sub>C-C</sub>= 1.9 Hz).

**<sup>11</sup>B-NMR** (160 MHz, DMSO-*d*<sub>6</sub>): δ(ppm)= 11.1 (s).

**<sup>19</sup>F-NMR** (471 MHz, DMSO-*d*<sub>6</sub>): δ(ppm) = -113.6 (s)

**HRMS** (m/z): [M]<sup>+</sup> calcd. for C<sub>9</sub><sup>13</sup>C<sub>2</sub>H<sub>11</sub>O<sub>4</sub>N<sup>11</sup>BF, 253.08268; found, 253.08396.

**[*aryl*-<sup>2</sup>H<sub>4</sub>, <sup>15</sup>N]-MIDA boronate**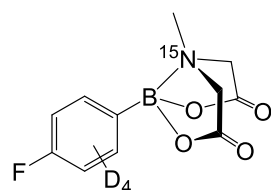

[*aryl*-<sup>2</sup>H<sub>4</sub>, <sup>15</sup>N]-**1a**: The general procedure was followed with [*aryl*-<sup>2</sup>H<sub>4</sub>]-**2a** (0.334 g, 2.32 mmol, 1.07 equiv), [<sup>15</sup>N]-**3** (0.322 g, 2.17 mmol, 1.0 equiv), toluene (40 mL), and DMSO (4

mL). After purification, [*aryl*-<sup>2</sup>H<sub>4</sub>, <sup>15</sup>N]-**1a** (0.419 g, 1.63 mmol, yield 75 %) was obtained as a white crystalline solid.

**m.p.:** 219-222 °C.

**R<sub>f</sub>**(AcOEt) = 0.36 (UV lamp).

**<sup>1</sup>H-NMR** (500 MHz, DMSO-*d*<sub>6</sub>) δ(ppm)= 4.33 (d, <sup>2</sup>J<sub>H-H</sub>= 17.5 Hz, 2H) 4.11(d, <sup>2</sup>J<sub>H-H</sub>= 17.5 Hz, 2H), signal of CH<sub>3</sub>- is obscured by overlap with DMSO-*d*<sub>6</sub>-n.

**<sup>13</sup>C{<sup>1</sup>H,<sup>2</sup>H}-NMR** (101 MHz, DMSO-*d*<sub>6</sub>): δ(ppm)= 169.3 (d, <sup>2</sup>J<sub>C-N</sub>=3.0 Hz), 162.9 (d, <sup>1</sup>J<sub>C-F</sub>= 245.0 Hz), 134.2 (d, <sup>3</sup>J<sub>C-F</sub>= 7.9 Hz), 114.2 (d, <sup>2</sup>J<sub>C-F</sub>=19.7 Hz), 61.8 (d, <sup>1</sup>J<sub>C-N</sub>= 5.8 Hz), 47.5 (d, <sup>1</sup>J<sub>C-N</sub>= 5.6 Hz), broad C-B signal not observed.

**<sup>11</sup>B-NMR** (160 MHz, DMSO-*d*<sub>6</sub>): δ(ppm)= 11.1 (s).

**<sup>15</sup>N-NMR** (51 MHz, DMSO-*d*<sub>6</sub>): δ(ppm)= 49.3 (s).

**<sup>19</sup>F-NMR** (471 MHz, DMSO-*d*<sub>6</sub>): δ(ppm)= -113.6 (s).

**HRMS** (m/z): [M]<sup>+</sup> calcd. for C<sub>11</sub>H<sub>7</sub><sup>2</sup>H<sub>4</sub>O<sub>4</sub><sup>15</sup>N<sup>11</sup>BF, 256.09811; found, 256.09862.

### Synthesis of 4-fluorophenylboronic MIDA boronate [*methylene*-<sup>2</sup>H<sub>1,6</sub>]-**1a**

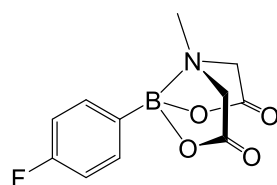

[*methylene*-<sup>2</sup>H<sub>1,6</sub>]-**1a**

In a 50 mL round bottom flask with a magnetic stirrer, **1a** (1.50 g, 5.98 mmol) alongside THF (30 mL). Then a premade solution of K<sub>2</sub>DPO<sub>4</sub> in D<sub>2</sub>O (6 mL, pD=9.2) was added to the flask. The system was stirred for 20 minutes (500 rpm, 21° C) and then HCl (2 M) was added until pD=7 (measured with pH paper). The system was saturated with NaCl until the phase splitting was observed. Organic and aqueous layers were separated and the aqueous layer was extracted with Et<sub>2</sub>O (3 x 10 mL). The combined organic layer was dried over MgSO<sub>4</sub>, filtered and the solvent was distilled *in vacuo*.



The remaining solid was purified by column in silica gel using Et<sub>2</sub>O/MeCN (1:1 v/v) as a eluent. The product was recrystallized from Et<sub>2</sub>O/MeCN and vacuum filtrated and dried. The final product [*methylene*-<sup>2</sup>H<sub>1,6</sub>]-**1a** (0.668 g, 44 % yield) was obtained and characterised.

**R<sub>f</sub>**(AcOEt) = 0.36 (UV lamp).

**<sup>1</sup>H-NMR** (500 MHz, DMSO-d<sub>6</sub>) δ(ppm) = 7.47 (dd, <sup>3</sup>J<sub>H-H</sub> = 8.7 Hz, <sup>4</sup>J<sub>H-F</sub> = 6.3 Hz, 2H), 7.17 (dd, <sup>3</sup>J<sub>H-F</sub> = 9.5 Hz, <sup>3</sup>J<sub>H-H</sub> = 8.7, 2H), 4.33 (m, 0.81H) 4.11(m, 1.6H), signal of CH<sub>3</sub>- is obscured by overlap with DMSO-d<sub>6</sub>-n.

**<sup>13</sup>C{<sup>1</sup>H,<sup>2</sup>H}-NMR** (101 MHz, DMSO-d<sub>6</sub>): δ(ppm) = 169.3 (s), 162.9 (d, <sup>1</sup>J<sub>C-F</sub> = 245.0 Hz), 134.64 (d, <sup>3</sup>J<sub>C-F</sub> = 7.9 Hz), 114.5 (d, <sup>2</sup>J<sub>C-F</sub> = 19.7 Hz), 61.8 (m), 47.5 (s), broad C-B signal not observed.

**<sup>11</sup>B-NMR** (160 MHz, DMSO-d<sub>6</sub>): δ(ppm) = 11.2 (s).

**<sup>19</sup>F-NMR** (471 MHz, DMSO-d<sub>6</sub>): δ(ppm) = -113.0 (s).

III. NaOH titrations of **1a**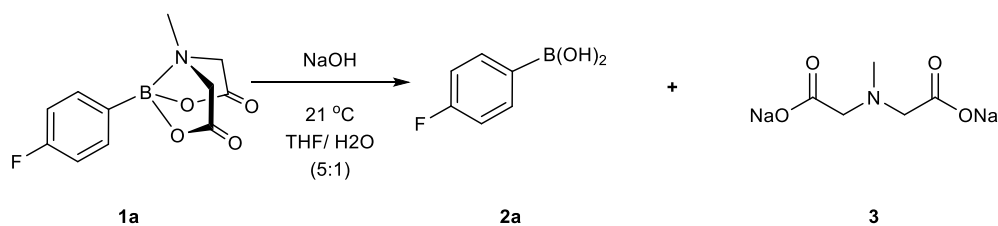

For each sample, **1a** (0.012 g, approximately  $4.8 \times 10^{-2}$  mmol) was dissolved in THF (0.400 mL) in a J-Young valve NMR tube with vigorous shaking. An aqueous solution of NaOH (0.08 mL,  $x$  equiv;  $x = 0.02$  to 1.6) was added slowly via micro-syringe with rapid shaking used to mix the solution as the NaOH was added. A capillary filled with DMSO- $d_6$  was placed in the tube. The sample was analysed by  $^{19}\text{F}$  NMR, the first data point was acquired after approximately 9 min and then a spectrum was recorded every 2 h. The  $^{19}\text{F}$  NMR signals corresponding to **1a** and **2a** were integrated (the product of oxidation of **2a** was also observed, <2 %) to calculate conversion. The results are displayed in Figure 1.

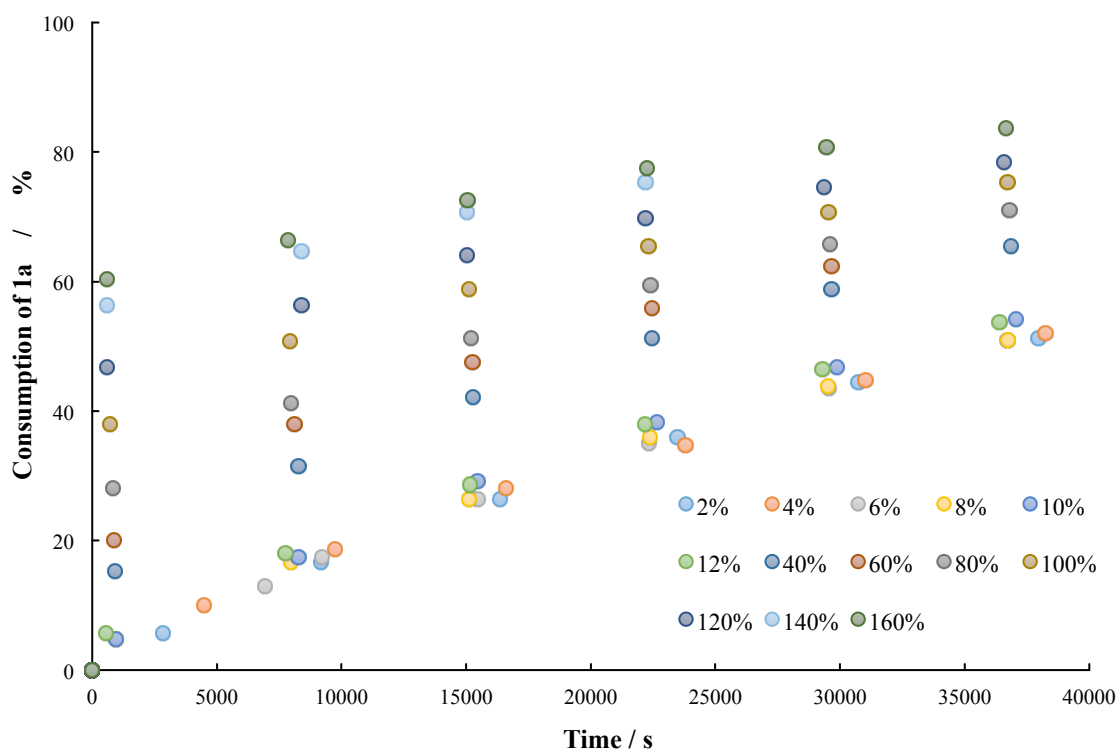

**Figure 1.** Titration of 4-fluorophenyl MIDA boronate **1a** in THF-H<sub>2</sub>O with NaOH at room temperature.



| Entry | pH   | $k_{\text{obs}} / \text{s}^{-1}$ | $\log k_{\text{obs}}$ | Buffer                                                         |
|-------|------|----------------------------------|-----------------------|----------------------------------------------------------------|
| 1     | 1    | $7.15 \times 10^{-5}$            | -3.73                 | CF <sub>3</sub> COOH/CF <sub>3</sub> COO                       |
| 2     | 1.5  | $9.33 \times 10^{-5}$            | -4.03                 |                                                                |
| 3     | 2.5  | $7.4 \times 10^{-5}$             | -4.13                 |                                                                |
| 4     | 3    | $5.01 \times 10^{-5}$            | -4.3                  | CH <sub>3</sub> COOH / CH <sub>3</sub> COO <sup>-</sup>        |
| 5     | 3.9  | $7.15 \times 10^{-5}$            | -4.15                 |                                                                |
| 6     | 4.0  | $7.01 \times 10^{-5}$            | -4.15                 |                                                                |
| 7     | 4.1  | $6.77 \times 10^{-5}$            | -4.17                 |                                                                |
| 8     | 4.2  | $6.28 \times 10^{-5}$            | -4.20                 |                                                                |
| 9     | 4.3  | $6.59 \times 10^{-5}$            | -4.18                 |                                                                |
| 10    | 4.4  | $6.65 \times 10^{-5}$            | -4.18                 |                                                                |
| 11    | 4.5  | $6.78 \times 10^{-5}$            | -4.17                 |                                                                |
| 12    | 5.0  | $7.75 \times 10^{-5}$            | -4.11                 |                                                                |
| 13    | 6.0  | $1.03 \times 10^{-4}$            | -3.99                 |                                                                |
| 14    | 7.0  | $1.37 \times 10^{-4}$            | -3.86                 |                                                                |
| 15    | 7.5  | $2.03 \times 10^{-4}$            | -3.69                 |                                                                |
| 16    | 8.0  | $2.35 \times 10^{-4}$            | -3.63                 |                                                                |
| 17    | 8.5  | $1.98 \times 10^{-4}$            | -3.70                 | NH <sub>3</sub> /NH <sub>4</sub> <sup>+</sup>                  |
| 18    | 9.0  | $6.53 \times 10^{-4}$            | -3.19                 |                                                                |
| 19    | 9.5  | $1.55 \times 10^{-3}$            | -2.81                 |                                                                |
| 20    | 10   | $2.07 \times 10^{-3}$            | -2.68                 | HPO <sub>4</sub> <sup>2-</sup> / PO <sub>4</sub> <sup>3-</sup> |
| 21    | 10.5 | $4.20 \times 10^{-3}$            | -2.38                 |                                                                |
| 22    | 11   | $4.25 \times 10^{-3}$            | -1.96                 |                                                                |

**Table 1.** Pseudo-first order rate constants of hydrolysis of MeB(MIDA) **1b** at 50 °C in aqueous solution.

### pH-rate profile

Methyl MIDA boronate **1b** ( $2.4 \times 10^{-5}$  mol) was added to a J-Young valve NMR tube in 0.6 mL of the buffer solution. The tube was briefly shaken and then placed in the NMR spectrometer at 50 °C. Each experiment was followed by  $^{11}\text{B}$  NMR, 200 scans were recorded every 5 minutes for several hours until approximately 90 % conversion. Spectra were analysed manually and both baseline and phase were corrected. Integrations of **1b** and **2b** were used to calculate pseudo-first order rate constant, plotted in Figure 3. The dashed line is the best fit where  $k_{\text{obs}}$  values were calculated with the following equation:

$$k_{\text{obs}} = k_{\text{H}^+}[\text{H}^+] + k_0 + k_{\text{OH}^-}[\text{OH}^-] \quad (\text{Eq 1})$$

If  $\text{pH} > 4$  then,

$$k_{\text{obs}} \approx k_0 + k_{\text{OH}^-}[\text{OH}^-] \quad (\text{Eq 2})$$

$k_0$  = uncatalyzed rate constant ( $7.08 \times 10^{-5} \text{ s}^{-1}$ )  
 $k_{\text{OH}^-}$  = base promoted rate constant ( $2.51 \text{ M}^{-1} \text{ s}^{-1}$ ).  
 $k_{\text{H}^+}$  = acid promoted rate constant ( $8 \times 10^{-4} \text{ M}^{-1} \text{ s}^{-1}$ ).

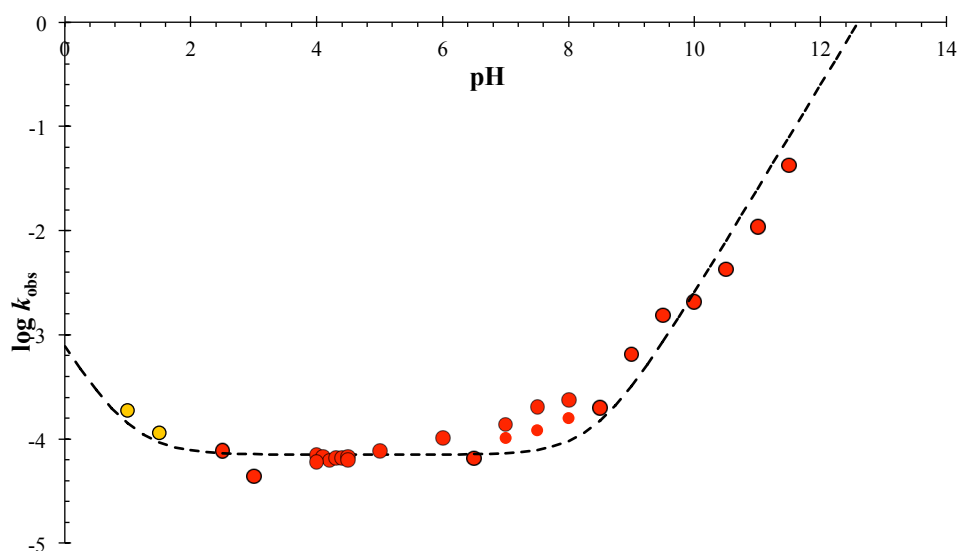

**Figure 3.** Experimental and theoretical pH-rate profiles of hydrolysis of **1b** at 50 °C in aqueous buffer solutions.

## V. $^{18}\text{O}$ Incorporations under Conditions A-G

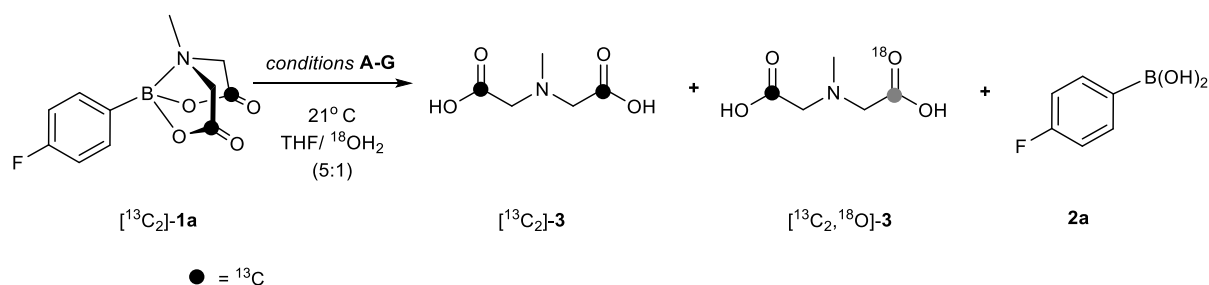

**CONDITIONS A to G:** In all cases, reactions were performed in a 2 mL glass vial at room temperature (21 °C) stirred with a magnetic bar. For each experiment a solution of [ $^{13}\text{C}_2$ ]-**1a** (0.500 mL, 0.1 M) in dry THF was measured with a syringe and placed in the vial. Consumption of starting material was confirmed by TLC ( $R_f = 0.3$ , EtOAc, UV lamp). The hydrolysis was conducted using  $^{18}\text{OH}_2$  with isotope enrichment specified as 97.7 %.

### Experiment A (2.9 equiv, NaOH, 1000 rpm, 10 min)

NaOH (5.8 mg, 0.145 mmol, 2.9 equiv) was dissolved in  $^{18}\text{OH}_2$  (0.1 mL) in a vial and then added over 20 seconds via fine-needle syringe to the solution of **1a**, being stirred at 1000 rpm. The mixture was stirred for an additional 10 min. The upper organic layer of the heterogeneous mixture was removed via syringe and transferred to a round-bottomed flask and the solvent removed *in vacuo*. Residual **1a** was analysed by  $^{13}\text{C}\{^1\text{H}\}$  NMR. The plastic cap of the vial was replaced with a rubber cap, and  $\text{N}_2$  flushed through for 40 minutes to evaporate any THF. The white solid thus obtained was dissolved in  $\text{H}_2\text{O}$  (0.400 mL) and transferred to a NMR tube. A capillary of  $\text{D}_2\text{O}$  was placed in the tube before running a  $^{13}\text{C}\{^1\text{H}\}$  NMR spectrum of **3** (Na salt).

### Experiment B (3 equiv, NaOH, 1000 rpm, saturated NaCl, 24 h)

In this case, a saturated solution of NaCl in  $^{18}\text{OH}_2$  (0.05 mL) was added to the substrate solution. Then, a solution of NaOH in  $^{18}\text{OH}_2$  (0.05 mL) was added to the reaction. The system was stirred at 1000 rpm for 24 h. The organic layer was removed by syringe, the remaining organic solvent was removed from the aqueous layer with nitrogen for 2 h. The white solid was dissolved in  $\text{H}_2\text{O}$  (0.4 mL), a capillary of  $\text{D}_2\text{O}$  added and the sample analysed by  $^{13}\text{C}\{^1\text{H}\}$  NMR.

### Experiment C (3 equiv, NaOH, 100 rpm, saturated NaCl, 24 h)

Experiment C was run in parallel with experiment B, the only difference being the stirring rate (100 rpm).

*Experiment D (3 equiv K<sub>3</sub>PO<sub>4</sub>, 1000 rpm, 24 h)*

A solution of K<sub>3</sub>PO<sub>4</sub> in <sup>18</sup>OH<sub>2</sub> (0.5 mL, 2.5 M, 5 equiv) was added to the substrate solution. The vial was sealed with a plastic cap and stirred for 24 h at room temperature. After this time, no substrate was detected by TLC. The upper organic layer was removed from the vial via syringe, and nitrogen was used to flush out the remaining organic solvent over a period of 2 hours. The remaining white solid was dissolved in H<sub>2</sub>O (0.4 mL) a capillary of D<sub>2</sub>O added and the sample analysed by <sup>13</sup>C{<sup>1</sup>H} NMR.

*Experiment E (3 equiv K<sub>3</sub>PO<sub>4</sub>, 100 rpm, 24 h)*

Experiment E was run in parallel with experiment D under same conditions, the only difference being the stirring rate (100 rpm).

*Experiment F (initially homogeneous, 1000 rpm, 24 h)*

<sup>18</sup>OH<sub>2</sub> (0.1 mL) was added to the vial with the substrate (**1a**) in THF (0.5 mL). The vial was sealed with a plastic cap. The initially homogeneous solution was stirred at 1000 rpm for 24 h. The precipitated formed was removed by vacuum filtration, and washed with THF (1 mL) before being dissolved in H<sub>2</sub>O (0.4 mL) transferred to a NMR tube, a capillary of D<sub>2</sub>O added and analysed by <sup>13</sup>C{<sup>1</sup>H} NMR.

*Experiment G (homogeneous throughout, 0 rpm in an NMR tube, 7 h)*

To prepare a concentrated HCl solution in <sup>18</sup>OH<sub>2</sub>, a two-necked round-bottomed flask (100 mL) was charged with CaCl<sub>2</sub> (30 g) and a magnetic stirrer. A dropping funnel with pressure compensation was added to the flask, on the second neck: a gas adaptor, a piece of tubing, and a glass Pasteur pipette were connected to bubble the HCl generated through a vial containing <sup>18</sup>OH<sub>2</sub> (97 % enrichment). The dropping funnel was charged with HCl (20 mL, 36 % w/w) and the system was sealed with a rubber septum. The concentrated solution of acid was added slowly (over 3 h) to the CaCl<sub>2</sub>, and the gas generated was circulated. A positive overpressure of N<sub>2</sub> was maintained throughout. The solution formed was titrated (3 times) against a standard solution of NaOH using phenolphthalein as indicator. The final concentration of HCl in <sup>18</sup>OH<sub>2</sub> was found to be 12.3 M.

The hydrolysis experiment was conducted by dissolving [*carbonyl*-<sup>13</sup>C<sub>2</sub>]-**1a** (12.78 mg, 0.051 mmol) in THF-d<sub>8</sub> (0.5 mL) in a J-Young valve NMR tube and adding the 12.3 M HCl solution (0.1 mL) to give a 2M HCl solution (pH -0.3). The sample was vigorously shaken for 30 seconds and then inserted in the spectrometer. The reaction was followed via in situ <sup>13</sup>C{<sup>1</sup>H} NMR at 21° C. Incorporation of <sup>18</sup>OH<sub>2</sub> was calculated with the early conversion data since a fast equilibrium occurs before hydrolysis and a second exchange equilibrium was observed in the free ligand, [*carbonyl*-<sup>13</sup>C<sub>2</sub>]-**3**, under the reaction conditions.

In all cases the molar ratio of the  $^{13}\text{C}$ - $^{16}\text{O}$  and  $^{13}\text{C}$ - $^{18}\text{O}$  ( $\Delta\delta=30$  ppb) was calculated based on the integration of the respective peaks in the  $^{13}\text{C}$  NMR spectra. The general  $^{13}\text{C}$  NMR (101 MHz) experiment consisted of an inverse gated decoupled  $10^\circ$  pulse, 2 seconds of relaxation time, 32.55 seconds of acquisition time, and 10 ppm of spectral width.  $^{13}\text{C}$  NMR spectra with the relative integration of the  $^{13}\text{C}$ - $^{16}\text{O}$  and  $^{13}\text{C}$ - $^{18}\text{O}$  are shown in Figure 4.

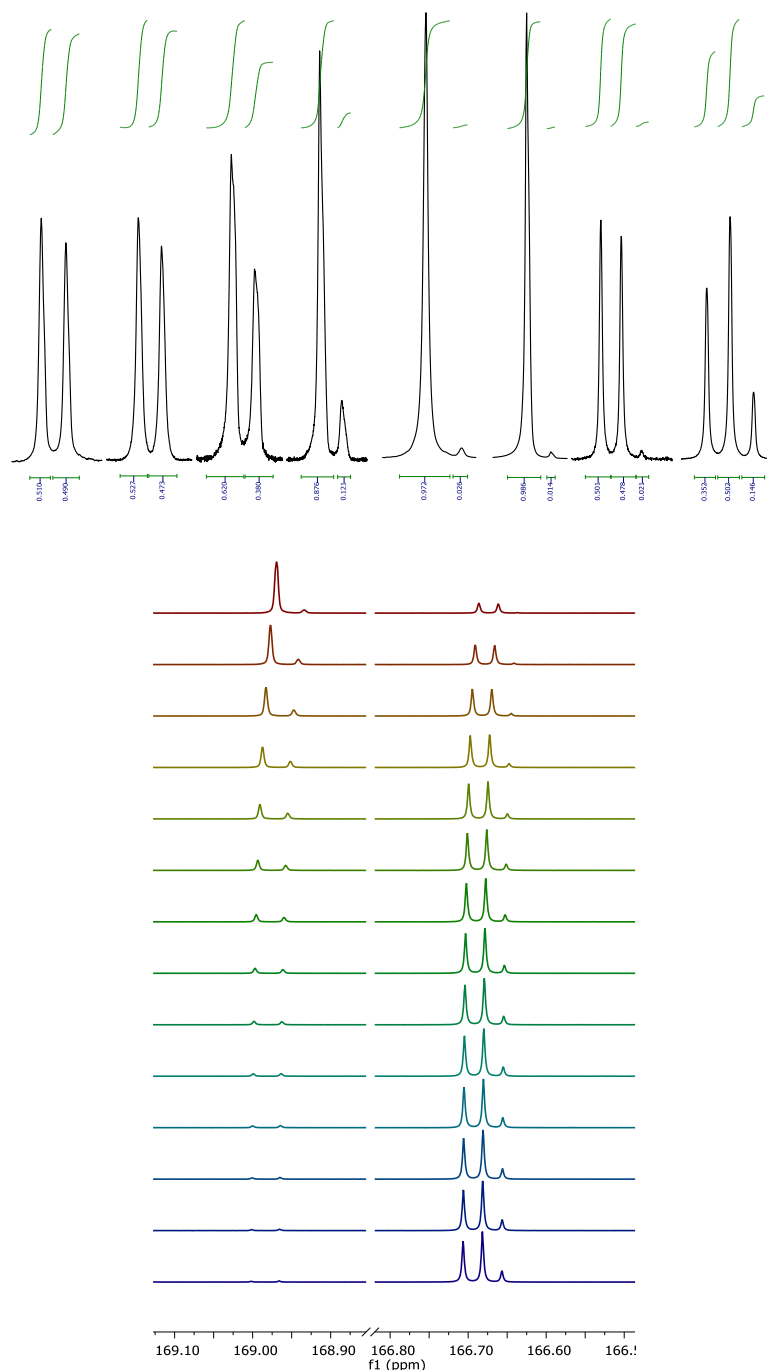

**Figure 4.** Upper:  $^{13}\text{C}\{^1\text{H}\}$  NMR spectra (carbonyl peaks) of  $^{13}\text{C}_2$ MIDA ligand **3** after hydrolysis of  $[^{13}\text{C}_2]$ -**1a** at room temperature in THF/ $^{18}\text{O}$ H<sub>2</sub> (5:1) mixtures. From left to right (experiments A-G - last two spectra are G at 25 % conversion and 98 % conversion). Lower: in situ  $^{13}\text{C}\{^1\text{H}\}$  NMR spectra of conditions G; spectra (top to bottom) run every 20 minutes, showing  $^{18}\text{O}$ -exchange into **1a** (169 ppm) but not **3** (167 ppm).



**Control experiments:** Since N-methyliminodiacetic acid (**3**) is not soluble in THF/H<sub>2</sub>O mixtures, tests for 16/18 oxygen exchange in **3** (0.0316 g, 0.215 mmol) were conducted in mixtures of D<sub>2</sub>O (0.200 mL) and <sup>18</sup>OH<sub>2</sub> (0.200 mL) in an NMR tube, analysing by <sup>13</sup>C{<sup>1</sup>H} NMR. The sample was kept at room temperature (21 °C) and a signal for <sup>13</sup>C-<sup>18</sup>O was observed after approximately 2 days (Fig 5-left). To confirm further exchange the sample was heated at 60 °C for 65 h and 89 h (Figs. 5-middle and 5-right respectively). This experiment suggests that the small amount of <sup>18</sup>O incorporation observed in [<sup>13</sup>C<sub>2</sub>]-**3** (*experiment A*) is the result of the background exchange of **3** with the solvent. It also confirms that the peak at 169.12 ppm is due to <sup>13</sup>C-<sup>16</sup>O<sub>2</sub> and not <sup>13</sup>C-<sup>16</sup>O<sub>1</sub><sup>18</sup>O<sub>1</sub>.

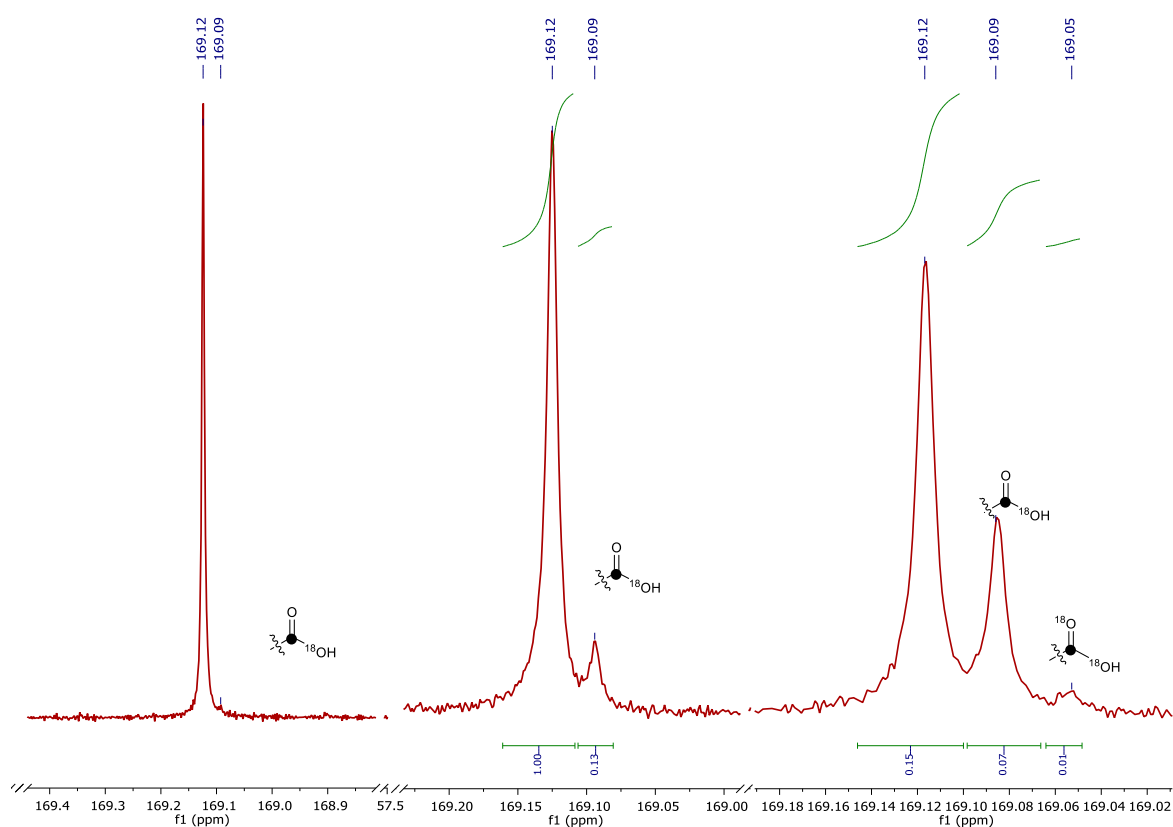

**Figure 5** <sup>13</sup>C{<sup>1</sup>H} NMR spectra (carbonyl peaks) of **3** after:

left hand side: sample after 2 days at 21 °C

middle: sample after 65 h at 60 °C

right hand side: sample after 89 h at 60 °C, under neutral conditions

## VI. Neutral Hydrolysis Kinetics and KIEs

Effect of  $K_3PO_4$ 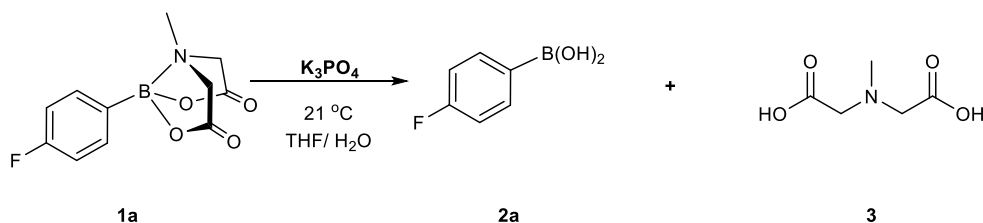

A 10.0 mL stock solution was made up with 4-fluorophenyl MIDA boronate (**1a**) (251.1 mg, 1.00 mmol), bis[4-(trifluoromethyl)phenyl] (13.3 mg, 0.0459 mmol) as internal standard, in THF. Aliquots of the solution (0.5 mL) were syringed into a J-Young valve NMR tube, 0.100 mL of an aqueous solution of  $K_3PO_4$  (as shown in Table 2) added, and finally a capillary with  $DMSO-d_6$ . The tube was vigorously shaken before putting in the spectrometer.  $^{19}F$  NMR spectra were recorded every 4 hours, the NMR tubes were kept at 21 °C between NMR measurements. Reactions were followed to approximately 90 % conversion. Concentrations of all species were calculated based on the integrations against the internal standard. For each experiment  $k_{obs}$  was calculated from the slope of  $\ln\{[1a]_0/[1a]_t\}$  vs time. In all cases,  $R^2 > 0.99$ , pseudo-first order rate constants are displayed in Table 2 and plotted in Figure 6.

| Entry | $Ar_F B(MIDA) /$<br>mmol | $K_3PO_4 /$ mmol | Equivalents | $k_{obs} / s^{-1}$    | $R^2$ |
|-------|--------------------------|------------------|-------------|-----------------------|-------|
| 1     | 0.050                    | 0                | 0           | $1.75 \times 10^{-5}$ | 0.999 |
| 2     | 0.050                    | 0.025            | 0.50        | $1.74 \times 10^{-5}$ | 0.999 |
| 3     | 0.050                    | 0.050            | 1.0         | $1.74 \times 10^{-5}$ | 0.999 |
| 4     | 0.050                    | 0.075            | 1.5         | $1.69 \times 10^{-5}$ | 0.999 |
| 5     | 0.050                    | 0.10             | 2.0         | $1.68 \times 10^{-5}$ | 0.999 |
| 6     | 0.050                    | 0.15             | 3.0         | $1.52 \times 10^{-5}$ | 0.999 |
| 7     | 0.050                    | 0.20             | 4.0         | $1.37 \times 10^{-5}$ | 0.998 |
| 8     | 0.050                    | 0.30             | 6.0         | $7.01 \times 10^{-6}$ | 0.997 |

**Table 2.** Pseudo-first order rate constants for hydrolysis of 4-fluorophenyl MIDA boronate (**1a**) at room temperature in THF- $H_2O$  (5:1) at different nominal  $K_3PO_4$  concentrations. These reactions undergo phase separation, the reaction monitored is that occurring in the upper aqueous-organic phase.

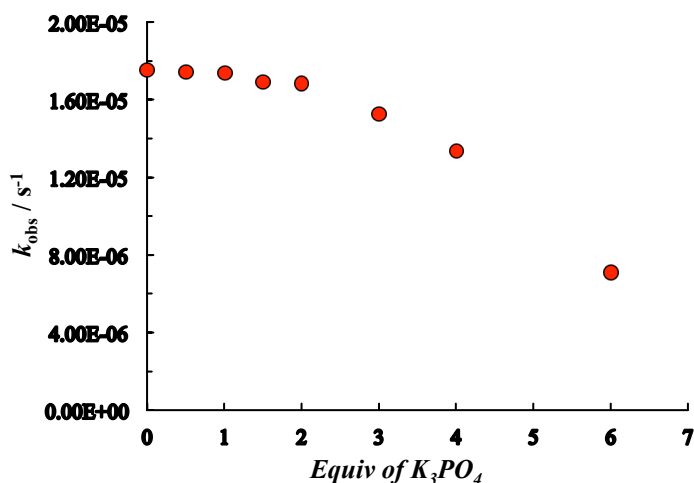

**Figure 6.** Effect of  $K_3PO_4$  on hydrolysis of 4-fluorophenyl MIDA boronate (**1a**) at room temperature in THF- $H_2O$  (5:1).

#### Effect of $H_2O$

Distilled degassed water was weighed into 10 mL volumetric flasks, then THF was added to complete the volume and the total weight of the solutions recorded (as shown in Table 3). 4-fluorophenyl MIDA boronate (**1a**) (12.5 mg, 0.0498 mmol) and 0.500 mL of the THF- $H_2O$  mixture were loaded in a J-Young valve NMR tube, the tube was shaken until the solid was fully dissolved. A capillary with DMSO- $d_6$  was placed in the tube and then the first  $^{19}F$  NMR spectrum was recorded.  $^{19}F$  NMR spectra were recorded at 300 K every 3 hours, the NMR tubes were kept at 21 °C between NMR measurements. Reactions were followed up to 15-90% conversion. Concentrations of 4-fluorophenyl MIDA boronate (**1a**) and 4-fluorophenyl boronic acid (**2a**) were calculated based on molar ratio. For each experiment  $k_{obs}$  was calculated from  $\ln\{[1a]_0/[1a]_t\}$  vs time. In all cases  $R^2 > 0.99$ , values are displayed in Table 3 and plotted in Figure 7.

| Entry | [H <sub>2</sub> O] / M | % w/w (H <sub>2</sub> O) | % w/w (THF) | mol fraction (H <sub>2</sub> O) | mol fraction (THF) | $k_{\text{obs}} / \text{s}^{-1}$ |
|-------|------------------------|--------------------------|-------------|---------------------------------|--------------------|----------------------------------|
| 1     | 0.000                  | 0.00                     | 0.00        | 0.000                           | 1.000              | 0                                |
| 2     | 0.528                  | 1.08                     | 98.9        | 0.042                           | 0.958              | $8.29 \times 10^{-7}$            |
| 3     | 0.986                  | 2.00                     | 98.0        | 0.076                           | 0.924              | $2.59 \times 10^{-6}$            |
| 4     | 2.00                   | 4.05                     | 96.0        | 0.144                           | 0.856              | $8.98 \times 10^{-6}$            |
| 5     | 2.99                   | 6.02                     | 94.0        | 0.204                           | 0.796              | $1.25 \times 10^{-5}$            |
| 6     | 3.02                   | 6.07                     | 93.9        | 0.206                           | 0.794              | $1.33 \times 10^{-5}$            |
| 7     | 4.99                   | 10.0                     | 90.0        | 0.204                           | 0.692              | $1.65 \times 10^{-5}$            |
| 8     | 7.05                   | 14.1                     | 86.0        | 0.396                           | 0.604              | $1.69 \times 10^{-5}$            |
| 9     | 9.06                   | 18.0                     | 82.0        | 0.467                           | 0.533              | $1.72 \times 10^{-5}$            |
| 10    | 11.0                   | 21.7                     | 78.3        | 0.525                           | 0.475              | $1.69 \times 10^{-5}$            |
| 11    | 19.9                   | 38.1                     | 61.9        | 0.711                           | 0.289              | $1.86 \times 10^{-5}$            |

**Table 3.** Pseudo-first order rate constants for hydrolysis of 4-fluorophenyl MIDA boronate (**1a**) at room temperature in THF-H<sub>2</sub>O mixtures.

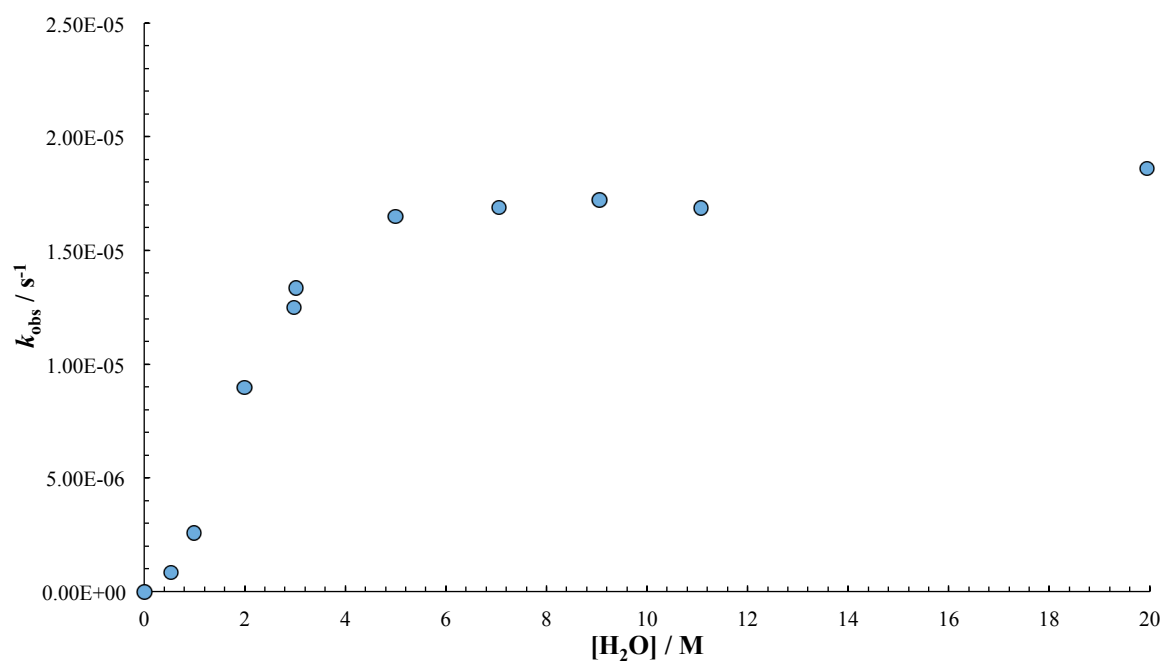

**Figure 7.** Effect of [H<sub>2</sub>O] on hydrolysis of 4-fluorophenyl MIDA boronate (**1a**) at room temperature.

A polynomial (eq 3) was fitted to reported values for water activity in THF/H<sub>2</sub>O. This equation was used with the experimental mol fraction of H<sub>2</sub>O ( $X_{\text{H}_2\text{O}}$ ) to calculate respective water activity ( $a_w$ ). These values are displayed in Table 4

$$a_w = -3.1378x^6 + 23.635x^5 - 53.676x^4 + 56.232x^3 - 30.272x^2 + 8.2124x + 0.0068 \quad (\text{Eq. 3})$$

Where  $x = \text{H}_2\text{O}$  mol fraction. This equation was obtained from the 6<sup>th</sup> order polynomial trend line of the data reported for water activity in mixtures with THF, shown in Figure 8.<sup>6</sup> A linear correlation between was obtained at plotting  $k_{\text{obs}}$  vs  $a_w^{2.8}$ , see Figure 9.

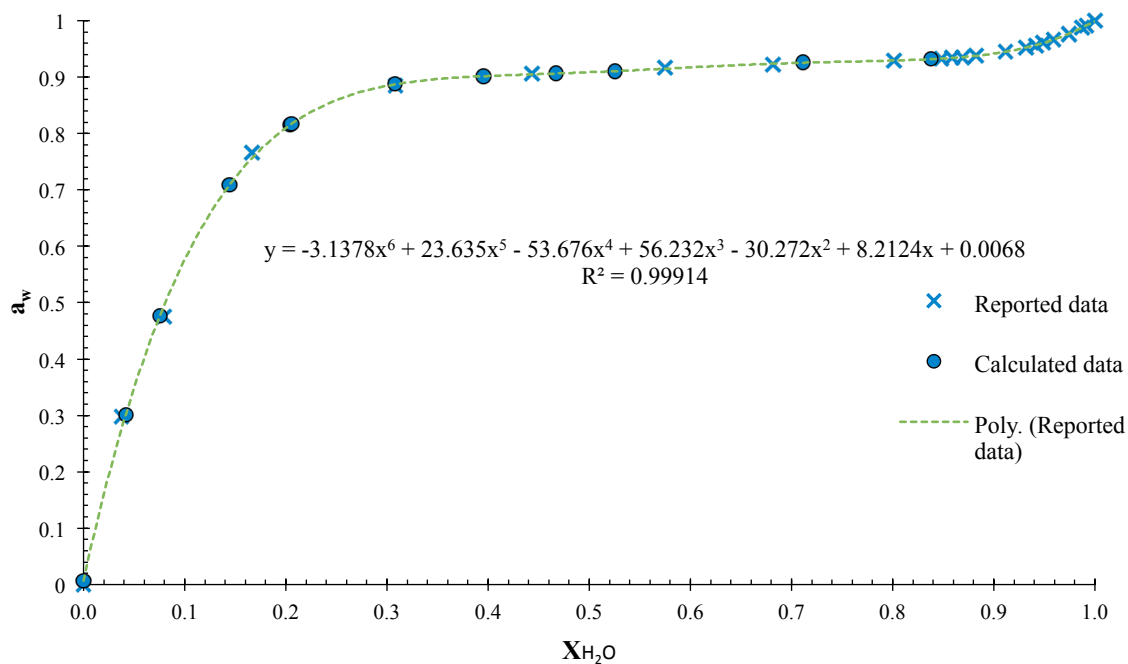

**Figure 8.** Water activity ( $a_w$ ) as a function of water mol fraction in THF-H<sub>2</sub>O mixtures.

| Entry | [H <sub>2</sub> O] / M | mol fraction (H <sub>2</sub> O) | a <sub>w</sub> | k <sub>obs</sub> / s <sup>-1</sup> |
|-------|------------------------|---------------------------------|----------------|------------------------------------|
| 1     | 0.000                  | 0.000                           | 0.0            | 0                                  |
| 2     | 0.528                  | 0.042                           | 0.30           | 8.29 × 10 <sup>-7</sup>            |
| 3     | 0.986                  | 0.076                           | 0.48           | 2.59 × 10 <sup>-6</sup>            |
| 4     | 2.00                   | 0.144                           | 0.71           | 8.98 × 10 <sup>-6</sup>            |
| 5     | 2.99                   | 0.204                           | 0.81           | 1.25 × 10 <sup>-5</sup>            |
| 6     | 3.02                   | 0.206                           | 0.81           | 1.33 × 10 <sup>-5</sup>            |
| 7     | 4.99                   | 0.204                           | 0.89           | 1.65 × 10 <sup>-5</sup>            |
| 8     | 7.05                   | 0.396                           | 0.90           | 1.69 × 10 <sup>-5</sup>            |
| 9     | 9.06                   | 0.467                           | 0.91           | 1.72 × 10 <sup>-5</sup>            |
| 10    | 11.0                   | 0.525                           | 0.91           | 1.69 × 10 <sup>-5</sup>            |
| 11    | 19.9                   | 0.711                           | 0.91           | 1.86 × 10 <sup>-5</sup>            |

**Table 4.** Calculated values of water activity in THF/H<sub>2</sub>O mixtures at room temperature.

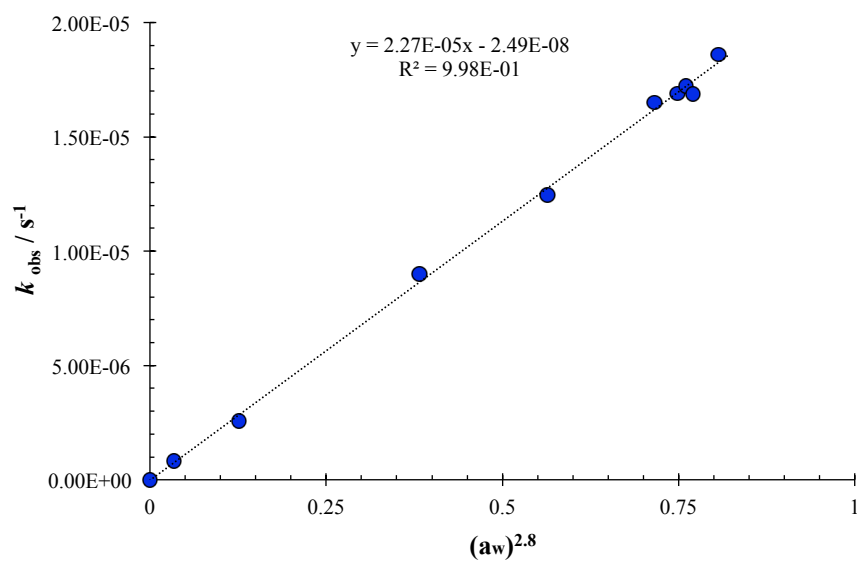

**Figure 9.** pseudo-first order rate constant as a function of a higher water activity term

### Thermodynamic Parameters

A stock solution of was made up with 5 mL of THF and 1 mL of H<sub>2</sub>O. 4-fluorophenyl MIDA boronate (**1a**) (approximately 15.3 mg, 0.0601 mmol) was placed in a J-Young valve NMR tube. The temperature in the NMR probe was established for 30 minutes to ensure stability. Then 0.600 mL of the THF/H<sub>2</sub>O solution and a capillary with DMSO-d<sub>6</sub> was added to the NMR tube, this was vigorously shaken before placing in the spectrometer. <sup>19</sup>F-NMR spectra were recorded every half hour, the NMR tubes were kept in the probe to keep the temperature constant. Reactions were followed up to 50-95 % conversion. A similar procedure was followed using a mixture containing 0.5 M water. For each experiment  $k_{\text{obs}}$  was calculated from  $\ln\{[\mathbf{1a}]_0/[\mathbf{1a}]_t\}$  vs time. In all cases  $R^2 > 0.99$ , values are displayed in Table 5. Activation parameters were calculated using the following constants:  $k_B=1.38 \times 10^{-23} \text{ J K}^{-1}$ ,  $h = 6.63 \times 10^{-34}$ , and  $R = 8.314 \text{ J mol K}^{-1}$ , and the slope and y-intercept of the Eyring analysis, Figure 10.

| Entry | Temp / K | $T^{-1} / \text{K}^{-1}$ | $k_{\text{obs}} / \text{s}^{-1}$ (9 M) | $k_{\text{obs}} / \text{s}^{-1}$ (0.5 M) |
|-------|----------|--------------------------|----------------------------------------|------------------------------------------|
| 1     | 294.15   | 0.00340                  | -                                      | $8.29 \times 10^{-7}$                    |
| 2     | 298.15   | 0.00335                  | $2.22 \times 10^{-5}$                  | -                                        |
| 3     | 303.15   | 0.00330                  | $4.08 \times 10^{-5}$                  | -                                        |
| 4     | 308.15   | 0.00325                  | $6.92 \times 10^{-5}$                  | $3.39 \times 10^{-6}$                    |
| 5     | 313.15   | 0.00319                  | $1.20 \times 10^{-4}$                  | $5.39 \times 10^{-6}$                    |
| 6     | 318.15   | 0.00314                  | $1.86 \times 10^{-4}$                  | $8.09 \times 10^{-6}$                    |
| 7     | 323.15   | 0.00309                  | $2.90 \times 10^{-4}$                  | $1.15 \times 10^{-5}$                    |

**Table 5.** Pseudo-first order rate constants for hydrolysis of 4-fluorophenyl MIDA boronate (**1a**) in THF-H<sub>2</sub>O (9.1 M and 0.5 M) at different temperatures.

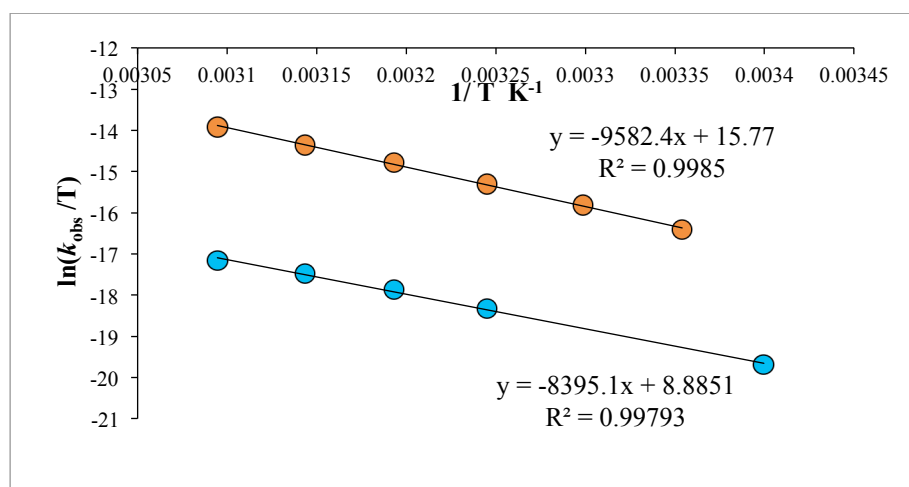

**Figure 10.** Eyring plot for hydrolysis of 4-fluorophenyl MIDA boronate (**1a**) in THF-H<sub>2</sub>O (9 M and 0.5 M)

**Proton inventory: Hydrolysis in  $L_2O$  : THF mixtures (L= H or D)**

A 5 mL stock solution (A) was made up with distilled  $H_2O$  (812.0 mg, 45.1 mmol) and THF to give a 9.02 M solution. A second solution (B) was prepared with  $D_2O$  (903.5 mg, 45.1 mmol) and THF to give a total volume of 5 mL. Approximately 0.05 mmol of 4-fluorophenyl MIDA boronate (**1a**) was placed in a J-Young valve NMR tube along with 0.5 mL of a mixture of solutions A and B. The solid was completely dissolved and a capillary with  $DMSO-d_6$  was put into the NMR tube.  $^{19}F$ -NMR spectra were recorded at 300 K every 3 hours, the NMR tubes were kept at 20 °C between NMR measurements. Reactions were followed up to approximately 90 % conversion. For each experiment  $k_{obs}$  was calculated  $\ln\{[1a]_0/[1a]_t\}$  vs time. In all cases  $R^2 > 0.99$ . The solvent compositions are displayed in Table 6 and the  $k_{obsL}/k_{obsH}$  ratios against mol fraction  $D_2O$  ( $X_{D_2O}$ ) are plotted in Figure 11.

| Entry | Solution A / mL | Solution B / mL | mol Fraction $D_2O$ | $[L_2O]_T$ /M | $k_{obs}$ ( $\times 10^{-5}$ ) / $s^{-1}$ |
|-------|-----------------|-----------------|---------------------|---------------|-------------------------------------------|
| 1     | 0               | 0.50            | 0                   | 9.0           | 1.63                                      |
| 2     | 0.05            | 0.45            | 0.1                 | 9.1           | 1.59                                      |
| 3     | 0.10            | 0.40            | 0.2                 | 9.1           | 1.56                                      |
| 4     | 0.15            | 0.35            | 0.3                 | 9.1           | 1.53                                      |
| 5     | 0.20            | 0.30            | 0.4                 | 9.1           | 1.47                                      |
| 6     | 0.25            | 0.25            | 0.5                 | 9.1           | 1.44                                      |
| 7     | 0.30            | 0.20            | 0.6                 | 9.1           | 1.41                                      |
| 8     | 0.35            | 0.15            | 0.7                 | 9.1           | 1.37                                      |
| 9     | 0.40            | 0.10            | 0.8                 | 9.1           | 1.33                                      |
| 10    | 0.45            | 0.05            | 0.9                 | 9.1           | 1.26                                      |
| 11    | 0.50            | 0.00            | 1.0                 | 9.1           | 1.20                                      |

**Table 6.** Pseudo-first order rate constants for hydrolysis of 4-fluorophenyl MIDA boronate (**1a**) in THF- $L_2O$  (9.1 M) at room temperature; L=H/D.



The theoretical values of the  $k_{\text{obsL}}/k_{\text{obsH}}$  were calculated with the equation:

$\frac{k_{\text{obsL}}}{k_{\text{obsH}}} = (1 - X_{\text{L}_2\text{O}} + X_{\text{L}_2\text{O}}\phi_1)(1 - X_{\text{L}_2\text{O}} + X_{\text{L}_2\text{O}}\phi_2)$  where  $X_{\text{L}_2\text{O}}$  is the mol fraction  $\text{D}_2\text{O}$  and  $\phi_1/\phi_2$  are fractionation factors for deuterium at two sites.

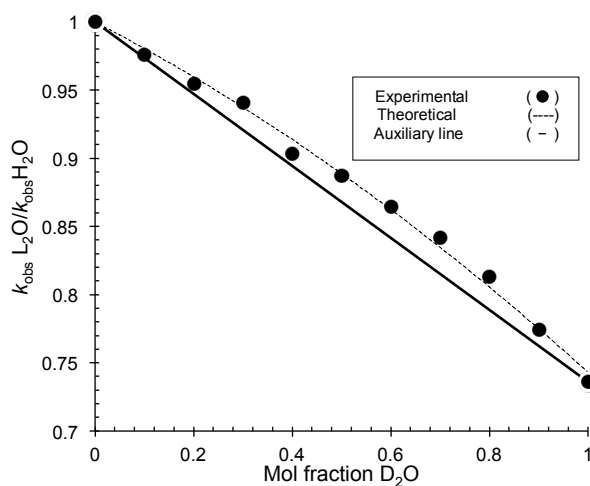

**Figure 11.** Proton inventory plot for hydrolysis of **1a** in THF- $\text{L}_2\text{O}$  mixtures at room temperature;  $\text{L}=\text{H}/\text{D}$ .

### Kinetic Isotope Effect Measurements

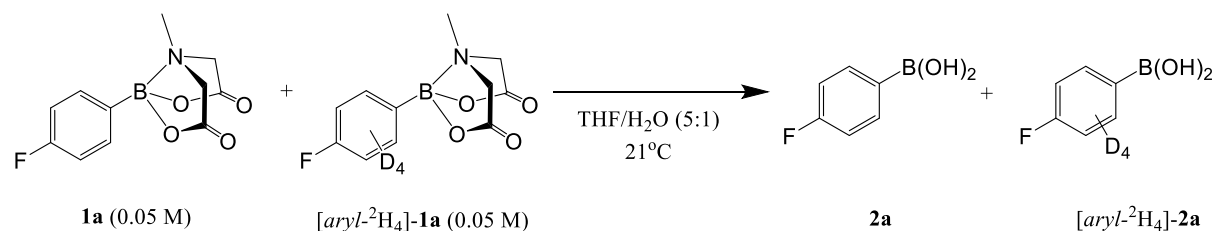

**1a** (0.05 mmol), the respective labelled reagent [*aryl*  $^2\text{H}_4$ ,  $^n\text{L}$ ]-**1a** (0.05 mmol), and 4- $\text{CF}_3\text{PhBr}$  as an internal standard were put in a J-Young valve NMR tube. Then, a mixture of THF/ $\text{H}_2\text{O}$  (5:1) (0.5 mL) was added and the tube was vigorously shaken. A capillary with  $\text{DMSO-d}_6$  was inserted and  $^{19}\text{F}$  NMR spectra were recorded approximately every 3 h. The NMR spectra were phased and baseline corrected manually. The concentration of reagents and products was calculated based on the integration against the internal standard. The isotopologue ratio and fractional conversions were calculated at different conversions and the data were fitted using a pseudo-first order competition.

| Entry | Reagents                                                                                                  | KIE                              | Measured | Corrected |
|-------|-----------------------------------------------------------------------------------------------------------|----------------------------------|----------|-----------|
| 1     | [ <sup>10</sup> B]- <b>1a</b> / [ <i>aryl</i> - <sup>2</sup> H <sub>4</sub> , <sup>11</sup> B]- <b>1a</b> | <sup>10</sup> B/ <sup>11</sup> B | 1.049    | 1.032     |
| 2     | [1- <sup>13</sup> C <sub>2</sub> ]- <b>1a</b> / [ <i>aryl</i> - <sup>2</sup> H <sub>4</sub> ]- <b>1a</b>  | <sup>12</sup> C/ <sup>13</sup> C | 1.015    | 0.999     |
| 3     | <b>1a</b> / [ <i>aryl</i> - <sup>2</sup> H <sub>4</sub> , <sup>15</sup> N]- <b>1a</b>                     | <sup>14</sup> N/ <sup>15</sup> N | 1.033    | 1.016     |
| 4     | <b>1a</b> / [ <i>aryl</i> - <sup>2</sup> H <sub>4</sub> ]- <b>1a</b>                                      | <sup>1</sup> H/ <sup>2</sup> H   | 1.017    | 1.000     |

**Table 7.** KIE measurements in neutral conditions.

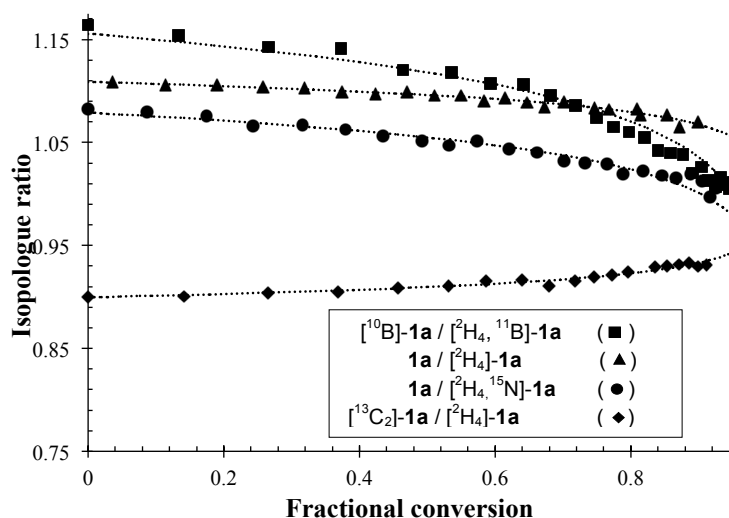

**Figure 12.** KIE determination in slow release conditions.

Crossover experiment - control for MIDA ligand / isotope exchange at high conversions

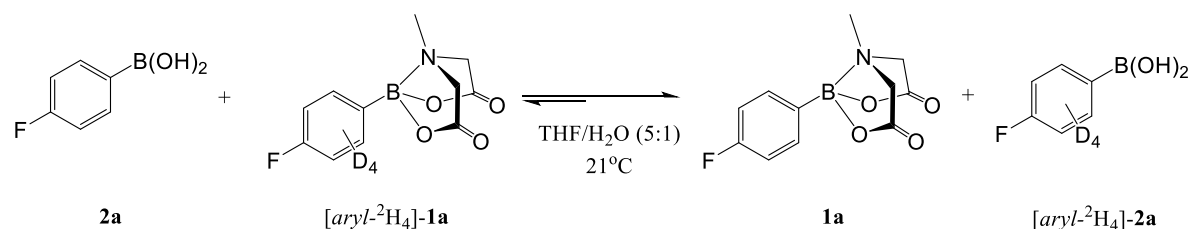

In a J-Young valve NMR tube: [*aryl*-<sup>2</sup>H<sub>4</sub>]-**1a** (0.0073 g, 0.0288 mmol, 1 equiv), **2a** (0.0041 g, 0.0297 mmol, 1.031 equiv), dry THF (0.5 mL), and H<sub>2</sub>O (0.1 mL) were mixed. Then, a capillary with DMSO-*d*<sub>6</sub> was placed in the tube and a <sup>19</sup>F NMR spectrum was recorded periodically. The tube was kept at room temperature (21 °C) when this was outside of the probe. Hydrolysis of [*aryl*-<sup>2</sup>H<sub>4</sub>]-**1a** was observed after few minutes however, formation of **1a** was observed after 20 h, as shown in Figure 13. Due to the phase splitting in the system, only a small amount of the ligand **3** remains in the organic layer however, this is enough to produce **1a**.

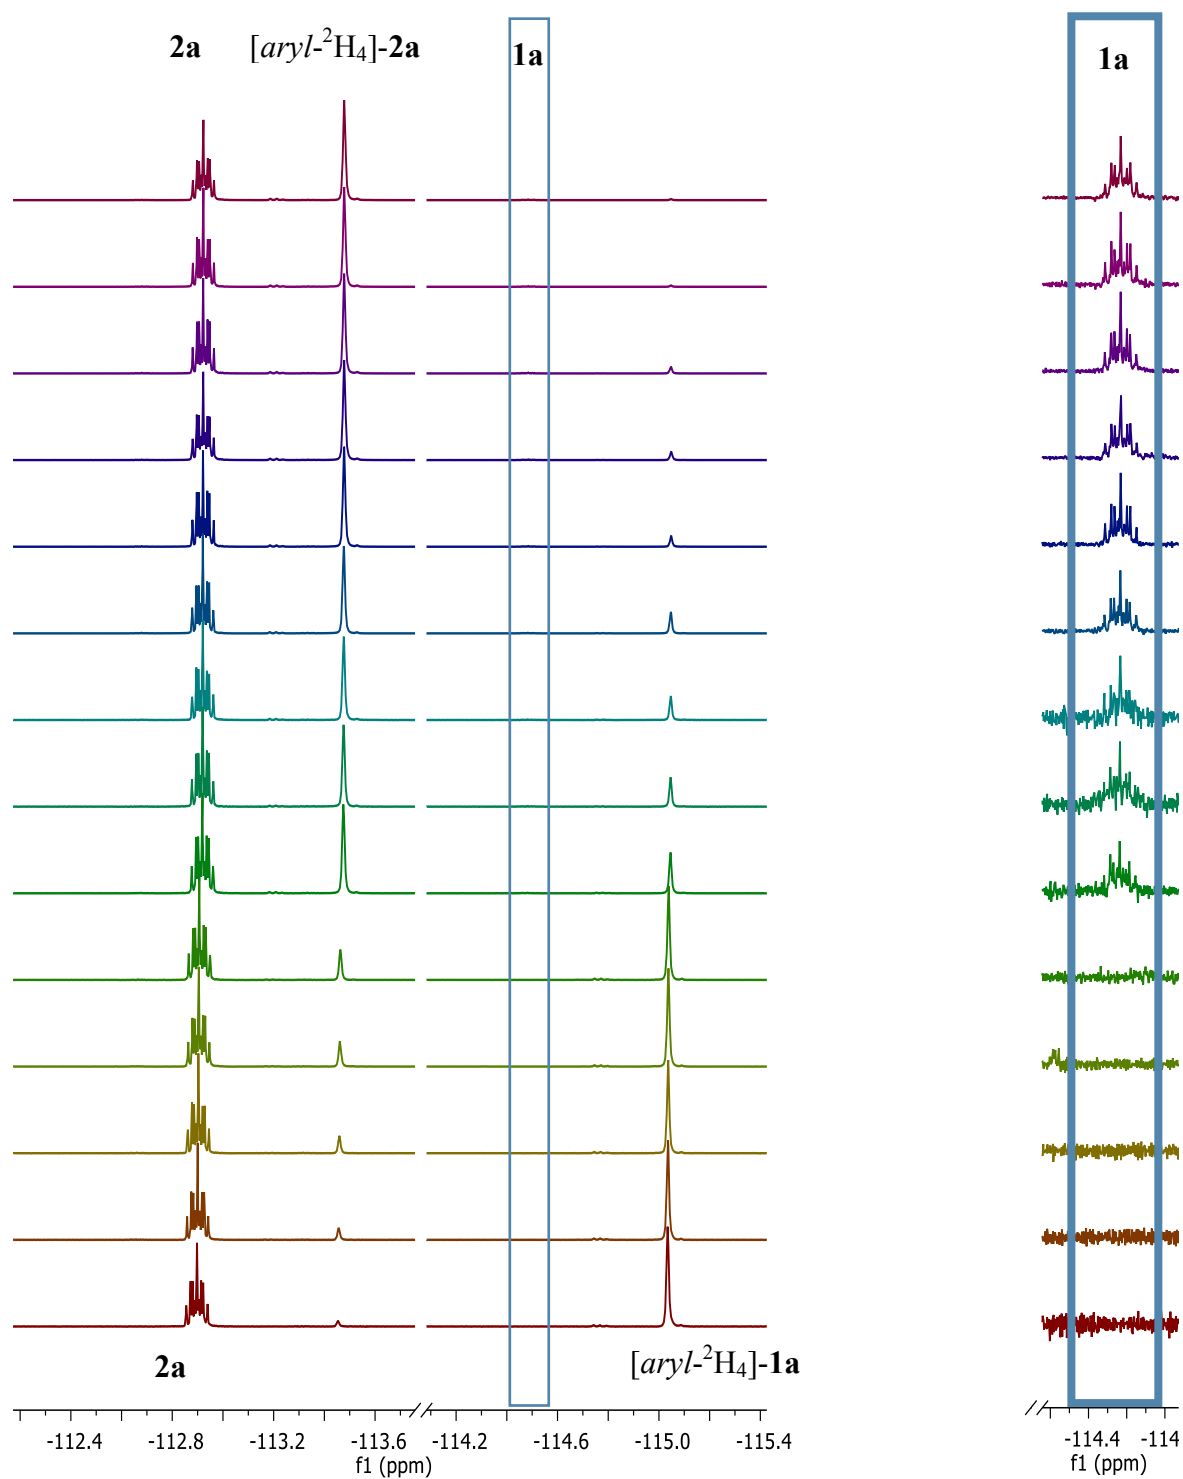

**Figure 13.** Cross-over experiment between **2a** + **3** and [aryl-<sup>2</sup>H<sub>4</sub>]-**1a** at room temperature in THF/H<sub>2</sub>O.

## Hammett Plots

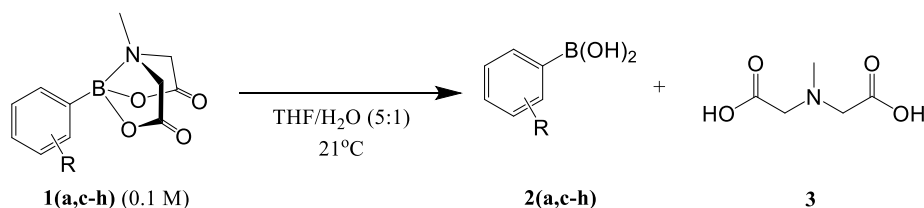

Approximately  $5 \times 10^{-5}$  mol of the aryl MIDA **1(a,c-h)** was put in a J-Young valve NMR tube and then a mixture of fresh prepared THF/H<sub>2</sub>O solution (5:1) (0.5 mL) was added. The tube was sealed and vigorously shaken for few seconds. A capillary with DMSO-d<sub>6</sub> was inserted and a <sup>11</sup>B NMR spectrum recorded immediately. Then, the sample was kept at 21 °C and the reaction was followed by <sup>11</sup>B NMR. Concentrations of the MIDA boronate and the respective boronic acid were calculated based on molar ratio. For each experiment  $k_{\text{obs}}$  was calculated by first order function and in all cases  $R^2 > 0.99$ . The rate constants and the  $k_{\text{obsX}}/k_{\text{obsH}}$  ratios against  $\sigma_{\text{Hammett}}$  values are shown in Table 8 and Figure 14.

| Substrate | R-                                    | $\sigma_{\text{Hammett}}$ | $k_{\text{obs}} / \text{s}^{-1}$ | $\log(k_{\text{obsX}}/k_{\text{obsH}})$ |
|-----------|---------------------------------------|---------------------------|----------------------------------|-----------------------------------------|
| <b>1c</b> | 4-CH <sub>3</sub> O-                  | -0.29                     | $6.57 \times 10^{-6}$            | -0.37                                   |
| <b>1d</b> | 4-CH <sub>3</sub> -                   | -0.14                     | $1.11 \times 10^{-5}$            | -0.14                                   |
| <b>1e</b> | H-                                    | 0                         | $1.53 \times 10^{-5}$            | 0                                       |
| <b>1a</b> | 4-F-                                  | 0.15                      | $1.79 \times 10^{-5}$            | 0.069                                   |
| <b>1f</b> | 4-CF <sub>3</sub> -                   | 0.53                      | $4.17 \times 10^{-5}$            | 0.44                                    |
| <b>1g</b> | 3-NO <sub>2</sub> -                   | 0.71                      | $4.73 \times 10^{-5}$            | 0.49                                    |
| <b>1h</b> | 3,5-(CF <sub>3</sub> ) <sub>2</sub> - | 0.92                      | $7.39 \times 10^{-5}$            | 0.69                                    |

**Table 8.** Pseudo-first order rate constants for aryl MIDA boronate hydrolysis in THF/H<sub>2</sub>O at 21°C.

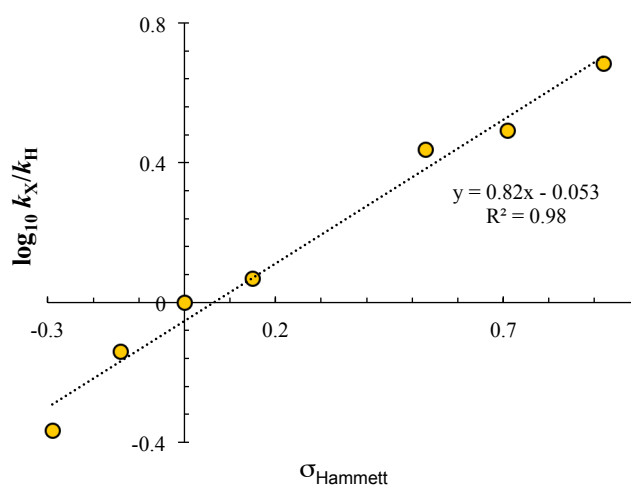

**Figure 14.** Hammett plot of neutral hydrolysis at 21 °C (upper 9.1 M H<sub>2</sub>O; lower: [H<sub>2</sub>O])

In additional experiments, the fluorinated aryl MIDA boronates: **1a** ( $3.0 \times 10^{-5}$  mol), **1f** ( $1.0 \times 10^{-6}$  mol) and **1h** ( $5 \times 10^{-4}$  mol) were put in a J-Young valve NMR tube and dissolved in a mixture of THF/H<sub>2</sub>O (0.5 mL). After insertion of a capillary of DMSO-d<sub>6</sub>, <sup>19</sup>F NMR spectra were recorded every 3 h.  $k_{\text{obs}}$  for each substrate was calculated from the slope at plotting  $\ln\{[\text{Ar}_\text{F}\text{B}(\text{MIDA})]_0/[\text{Ar}_\text{F}\text{B}(\text{MIDA})]\}$  vs time. The rate constants were used to calculate the gradient of a Hammett plot with three data points.

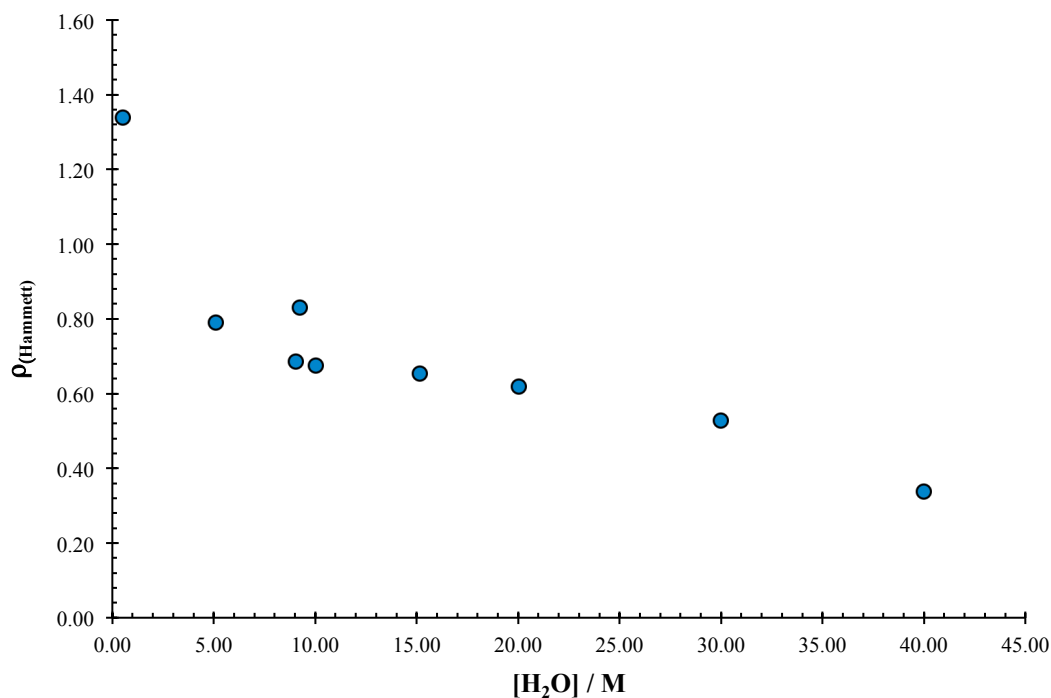

**Figure 15.** Hammett  $\rho$ (rho) values in different THF/H<sub>2</sub>O mixtures at 21 °C.

## VII. Base-Mediated Hydrolysis Kinetics and KIEs

### Kinetic order in substrate

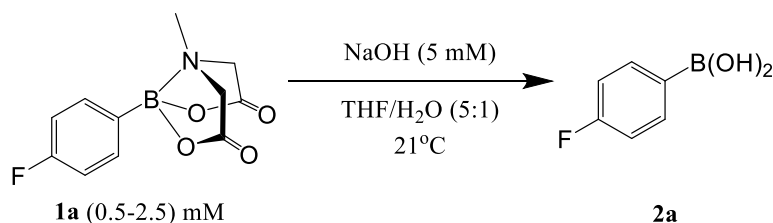

A 50 mL NaOH stock solution (10 mM) was prepared diluting aqueous NaOH (1.00 mL, 0.50 M) and topped up with THF/H<sub>2</sub>O (5:1). A set of solutions at different substrate concentrations was prepared with 4-fluorophenyl MIDA boronate **1a** (1-5 mM, 10 mL) as shown in Table 9. Blank solvent, THF/H<sub>2</sub>O (5:1), and the NaOH solution (10 mM) in THF/H<sub>2</sub>O (5:1) were loaded in the stopped flow reservoir syringes, then mixed to run the reference UV spectra and confirm the efficiency of the mixing at room temperature (21 °C). The blank solvent syringe was replaced with the freshly prepared substrate solution syringe (avoiding slow-release contribution), the system was purged 5 times with both solutions and then the absorbance was followed for the first five seconds, collecting 100 data points per second. Rate of absorbance change was plotted against base concentration as shown in Figure 16. Reaction order in substrate (**1a**) concentration

| Entry | Mass <b>1a</b> / mg | V <sub>tot</sub> / mL | [ <b>1a</b> ] / mM | [NaOH] / mM | ΔA / s <sup>-1</sup>    |
|-------|---------------------|-----------------------|--------------------|-------------|-------------------------|
| 1     | 2.66                | 10.00                 | 0.50               | 5.0         | 7.94 × 10 <sup>-3</sup> |
| 2     | 5.01                | 10.00                 | 1.0                | 5.0         | 1.46 × 10 <sup>-2</sup> |
| 3     | 7.51                | 10.00                 | 1.5                | 5.0         | 2.23 × 10 <sup>-2</sup> |
| 4     | 10.10               | 10.00                 | 2.0                | 5.0         | 2.93 × 10 <sup>-2</sup> |
| 5     | 12.61               | 10.00                 | 2.5                | 5.0         | 3.43 × 10 <sup>-2</sup> |

**Table 9.** Effect of substrate concentration on hydrolysis rate.

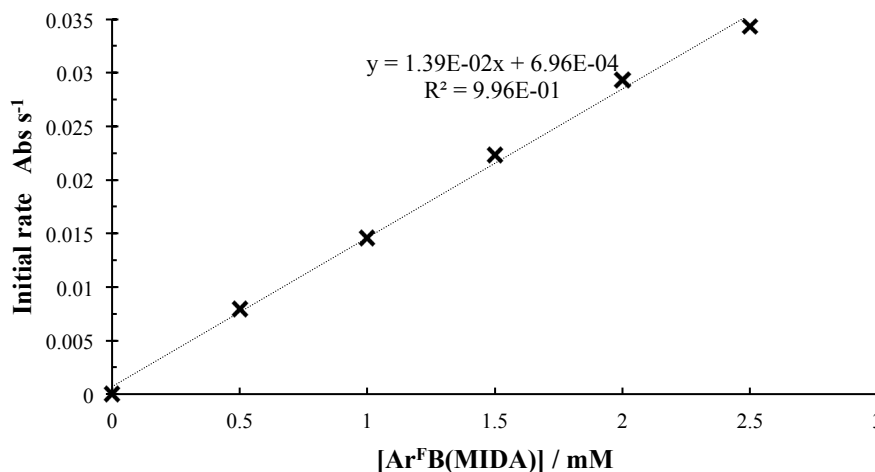

**Figure 16.** Reaction order in substrate (**1a**) concentration.

#### Kinetic order in NaOH

A 50 mL stock solution was made up with 4-fluorophenyl MIDA boronate **1a** (25.4 mg, 0.101 mmol) and THF/H<sub>2</sub>O (5:1). A second 50 mL stock solution was made up with NaOH (1.013 g, 25.3 mmol) and fresh distilled water, and from this solution, aliquots were diluted with H<sub>2</sub>O and the same THF/H<sub>2</sub>O (5:1) as shown in Table 10

| Entry | mL / NaOH | mL of H <sub>2</sub> O | Final volume / mL | [NaOH] / mM |
|-------|-----------|------------------------|-------------------|-------------|
| 1     | 0.250     | 1.250                  | 25.0              | 5.0         |
| 2     | 0.375     | 1.375                  | 25.0              | 7.5         |
| 3     | 0.500     | 1.000                  | 25.0              | 10.0        |
| 4     | 0.625     | 0.875                  | 25.0              | 12.5        |
| 5*    | 0.750     | 1.750                  | 25.0              | 15.0        |

**Table 10.** Preparation of NaOH solution in THF/H<sub>2</sub>O for fast release experiments.

Blank solvent, THF/H<sub>2</sub>O (5:1), and the respective base solution were loaded in the stopped flow reservoir syringes and mixed them to run the reference UV spectra and confirm the efficiency of the mixing at room temperature (21 °C). The blank solvent syringe was replaced with a substrate syringe, the stopped flow unit was purged 5 times with base and substrate solutions using single compressed air shots with a pressure of 80 psi. Once the system was purged, the absorbance was measured at different wavelength (250-450 nm) within the first 5 seconds using 5 ms for integration time (100 data points per second). Three experiments were recorded for each base concentration, and the average absorbance at 264 nm was used for kinetic analysis as well as the absorbance at 400 nm as a baseline correction. For each base concentration the absorbance was followed for 250 s to get the plateau ( $A_{\infty}$ ). The initial

change in absorbance was calculated with kinetic studio software at different base concentrations. The gradient of the best fit line and the absorbance at infinite time,  $A_{\infty}$ , were used to calculate the relative change in absorbance, as shown in Table 11.

| Entry | [NaOH] / mM | Initial rate / Abs s <sup>-1</sup> | Abs <sub>∞</sub> | ΔAbs <sub>rel</sub> s <sup>-1</sup> |
|-------|-------------|------------------------------------|------------------|-------------------------------------|
| 1     | 2.5         | $4.85 \times 10^{-3}$              | 0.333            | $1.45 \times 10^{-2}$               |
| 2     | 3.8         | $9.28 \times 10^{-3}$              | 0.373            | $2.49 \times 10^{-2}$               |
| 3     | 5.0         | $1.31 \times 10^{-2}$              | 0.399            | $3.28 \times 10^{-2}$               |
| 4     | 6.3         | $1.83 \times 10^{-2}$              | 0.440            | $4.16 \times 10^{-2}$               |
| 5*    | 7.5         | $2.37 \times 10^{-2}$              | 0.477            | $4.98 \times 10^{-2}$               |

**Table 11** Effect of base concentration on hydrolysis of 4-fluorophenyl MIDA boronate **1a** in fast release conditions

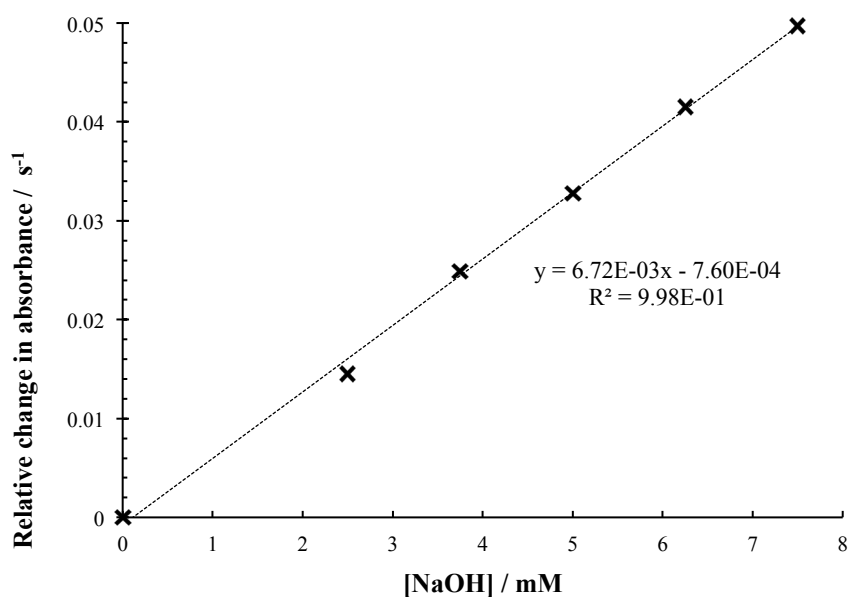

**Figure 17.** Determination of order reaction on NaOH concentration for hydrolysis of 4-fluorophenyl MIDA boronate **1a** in fast release conditions



## Hammett Correlation

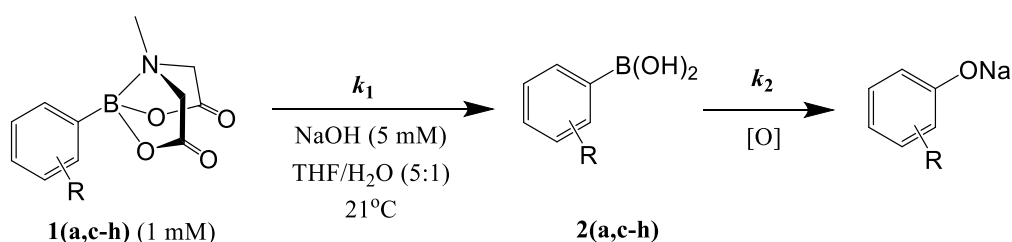

1 mM stock solutions were prepared with aryl MIDA boronates **1(a,c-h)** in THF/H<sub>2</sub>O (5:1) at room temperature.\* The same solvent mixture was used to make a 10 mM NaOH solution, the amount of hydroperoxides was below 50 mg/L at any time during the experiment to avoid extensive peroxide promoted oxidation of the boronic acid.

Reservoir syringes were charged, one with blank solvent and the other with the NaOH solution. The system was purged 5 times with base and substrate solutions using single compressed air shots with a pressure of 80 psi, after this the background spectrum was recorded. The blank solvent syringe was replaced by a substrate syringe; the system was purged again 5 times with base and substrate solutions. Then, the change in absorbance was measured from 0 – 250 s. The experiment was repeated three times and the average was used to calculate the pseudo-first order rate constant with kinetic studio software at the wavelength shown in Table 12. Relative rate constants were used to get a Hammett plot shown in Fig 18.

| Entry | Substrate | R                                     | $\rho_{\text{Hammett}}$ | $\lambda / \text{nm}$ | $k_1 / \text{s}^{-1}$ | $k_2 / \text{s}^{-1}$ | $\log(k_{1X}/k_{1H})$ |
|-------|-----------|---------------------------------------|-------------------------|-----------------------|-----------------------|-----------------------|-----------------------|
| 1     | <b>1c</b> | CH <sub>3</sub> O-                    | -0.29                   | 243.1                 | $1.17 \times 10^{-2}$ | -                     | -0.33                 |
| 2     | <b>1d</b> | CH <sub>3</sub> -                     | -0.14                   | 302.8                 | $1.74 \times 10^{-2}$ | $9.21 \times 10^{-3}$ | -0.16                 |
| 3     | <b>1e</b> | H-                                    | 0                       | 251.6                 | $2.59 \times 10^{-2}$ | $6.08 \times 10^{-3}$ | 0.00                  |
| 4     | <b>1a</b> | 4-F-                                  | 0.15                    | 264.5                 | $2.96 \times 10^{-2}$ | -                     | 0.073                 |
| 5     | <b>1f</b> | 4-CF <sub>3</sub> -                   | 0.53                    | -                     | -                     | -                     | -                     |
| 6     | <b>1g</b> | 3-NO <sub>2</sub> -                   | 0.71                    | 307                   | $5.88 \times 10^{-2}$ | -                     | 0.37                  |
| 7     | <b>1h</b> | 3,5-(CF <sub>3</sub> ) <sub>2</sub> - | 0.92                    | 262.3                 | $5.31 \times 10^{-2}$ | -                     | 0.33                  |

**Table 12.** Relative pseudo-first order rate constants for aryl MIDA boronates in base-promoted hydrolysis. *k*<sub>1</sub> is hydrolysis, *k*<sub>2</sub> is oxidation to phenol(ate).

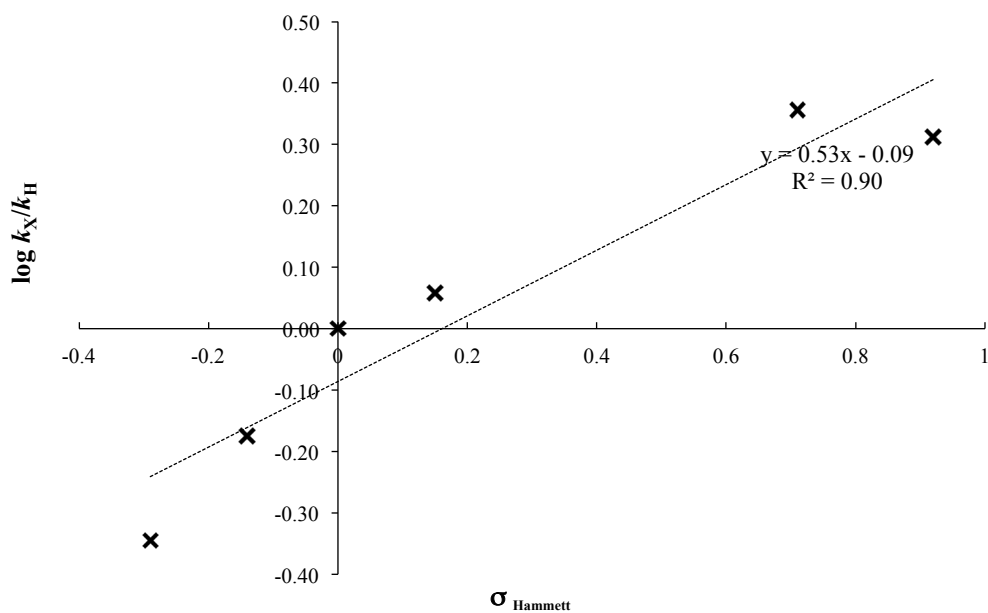

Figure 18. Hammett plot of base-promoted hydrolysis at room temperature.

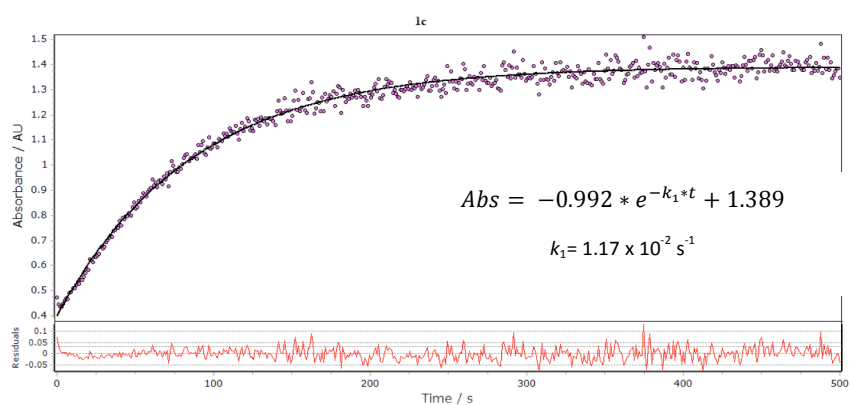

Figure 19. Experimental and fitted data for *1c* at 243.1 nm

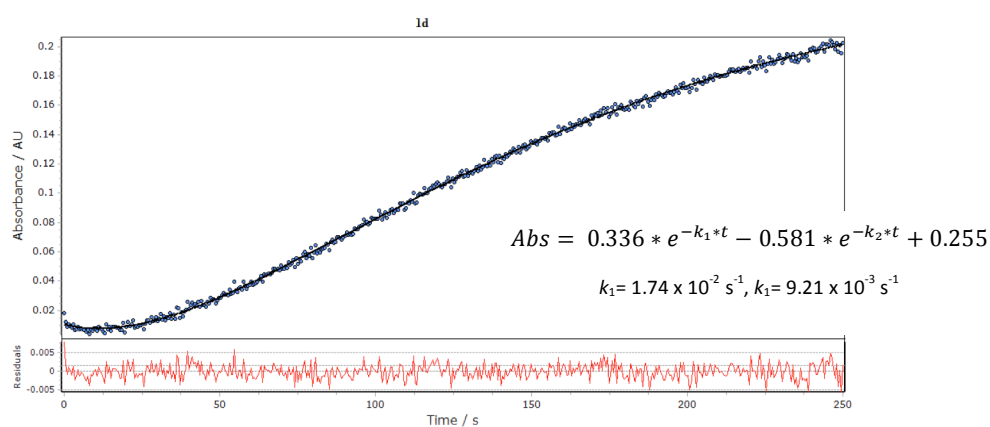

Figure 20. Experimental and fitted data for *1d* at 302.8 nm.

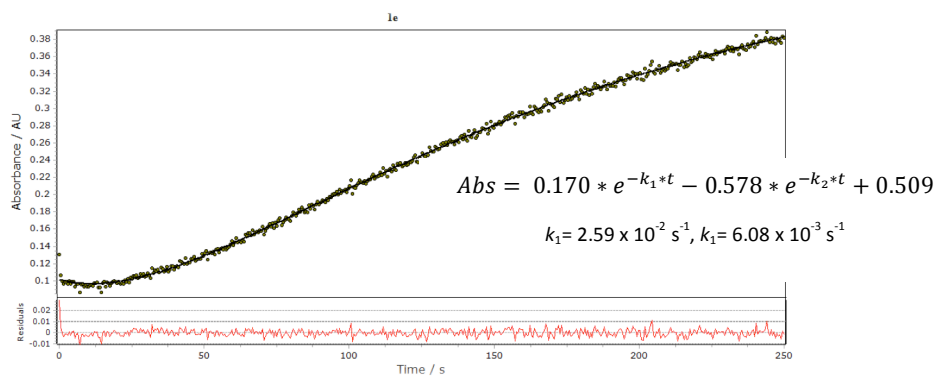

**Figure 21.** Experimental and fitted data for **1e** at 251.6 nm.

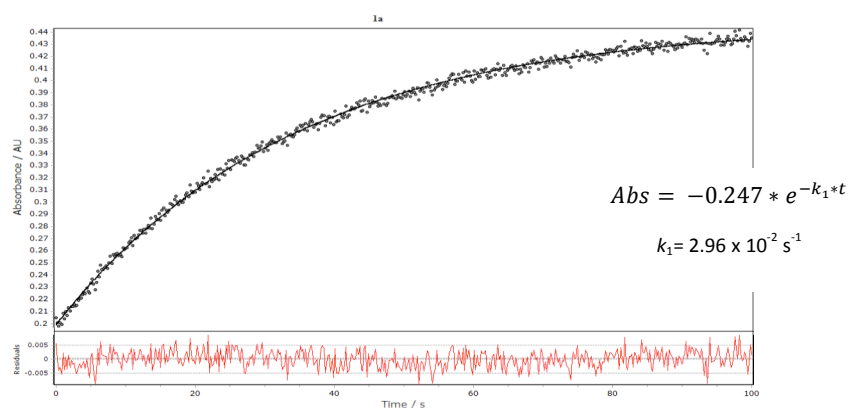

**Figure 22.** Experimental and fitted data for **1a** at 264.5 nm.

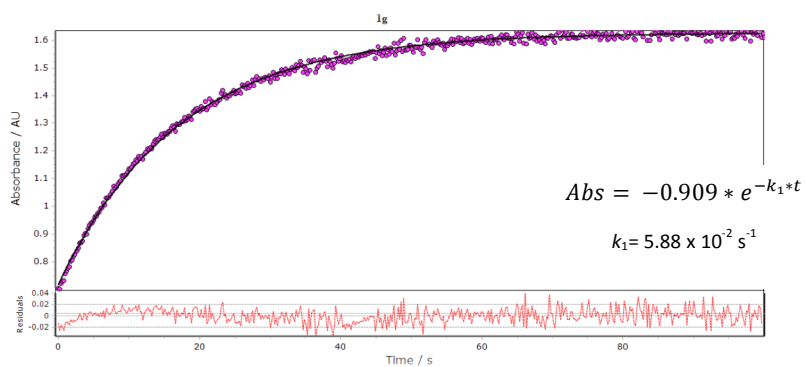

**Figure 23.** Experimental and fitted data for **1d** at 307 nm.

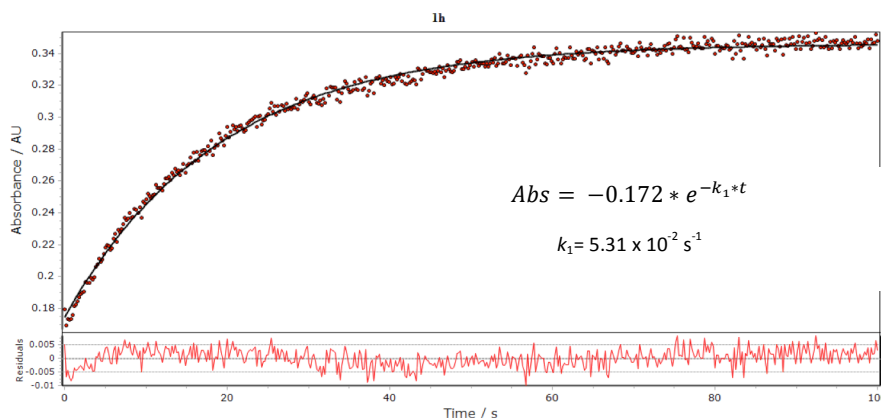

Figure 24. Experimental and fitted data for **1d** at 262.3 nm.

### Kinetic isotope measurements

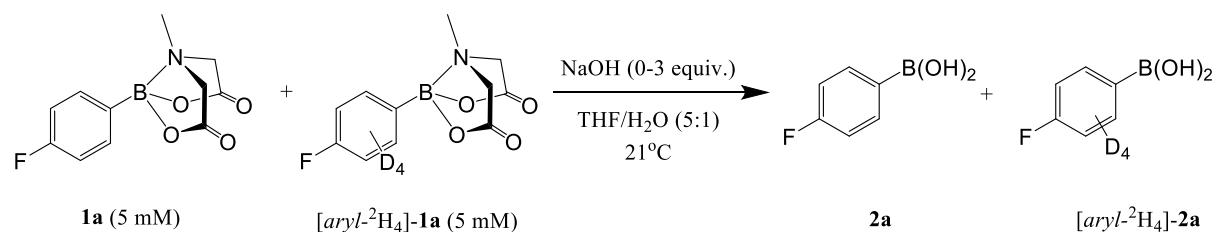

### General procedure

A 50.00 mL stock solution was made up with approximately **1a** (0.25 mmol), [*aryl*-<sup>2</sup>H<sub>4</sub>]-**1a** (0.25 mmol), and bis[(4-CF<sub>3</sub>Ph)<sub>2</sub>] (0.020 mmol) as internal standard in THF. Then, a 5.0 mL aliquot was transferred to a 10 mL round-bottomed flask previously charged with a magnetic stirrer. The system was put in a water bath at 21°C and stirred at 1000 rpm. A solution of NaOH (0-3 equiv., 1.0 mL) was loaded in a syringe adapted with a fine needle. The needle tip was collocated on the surface of the vortex generated due to the stirring. The aqueous hydroxide solution was added slowly with a syringe pump (0.2 mL min<sup>-1</sup>). Once addition was completed, the system was put in an ice-water bath and then enough MgSO<sub>4</sub> was added to dry the solution. The solution was then filtered through a cotton wool plugged glass Pasteur pipette and received in a round-bottom flask. The solution was subsequently concentrated *in vacuo* (40°C, 150 mbar) to 0.5 mL. After transfer to an NMR tube, a capillary with DMSO-d<sub>6</sub> was added and the solution analysed by <sup>19</sup>F NMR.

The concentration of both products and reagents was calculated based on integrations and concentration against the internal standard. The above was repeated to obtain each data point. The isotopologue ratios were plotted against total fractional conversion, see Figure 25.

The kinetic isotope value was determined by non-linear regression minimising the square error between experimental and theoretical values. The model consisted of a standard first-

order competition ( $k_{\text{rel}}$ ) to correlate the change in isotopologue ratio, as a function of overall fractional conversion (0 to 1).

| Entry | Reagents                                                                          | KIE                           | Measured | Corrected |
|-------|-----------------------------------------------------------------------------------|-------------------------------|----------|-----------|
| 1     | $[^{10}\text{B}]\text{-1a} / [\text{aryl-}^2\text{H}_4, ^{11}\text{B}]\text{-1a}$ | $^{10}\text{B}/^{11}\text{B}$ | 1.004    | 0.999     |
| 2     | $[1\text{-}^{13}\text{C}_2]\text{-1a} / [\text{aryl-}^2\text{H}_4]\text{-1a}$     | $^{12}\text{C}/^{13}\text{C}$ | 1.043    | 1.049     |
| 3     | $\mathbf{1a} / [\text{aryl-}^2\text{H}_4, ^{15}\text{N}]\text{-1a}$               | $^{14}\text{N}/^{15}\text{N}$ | 1.004    | 0.999     |
| 4     | $\mathbf{1a} / [\text{aryl-}^2\text{H}_4]\text{-1a}$                              | $^1\text{H}/^2\text{H}$       | 1.005    | 1.000     |

*Table 13. KIE measurements in fast release conditions.*

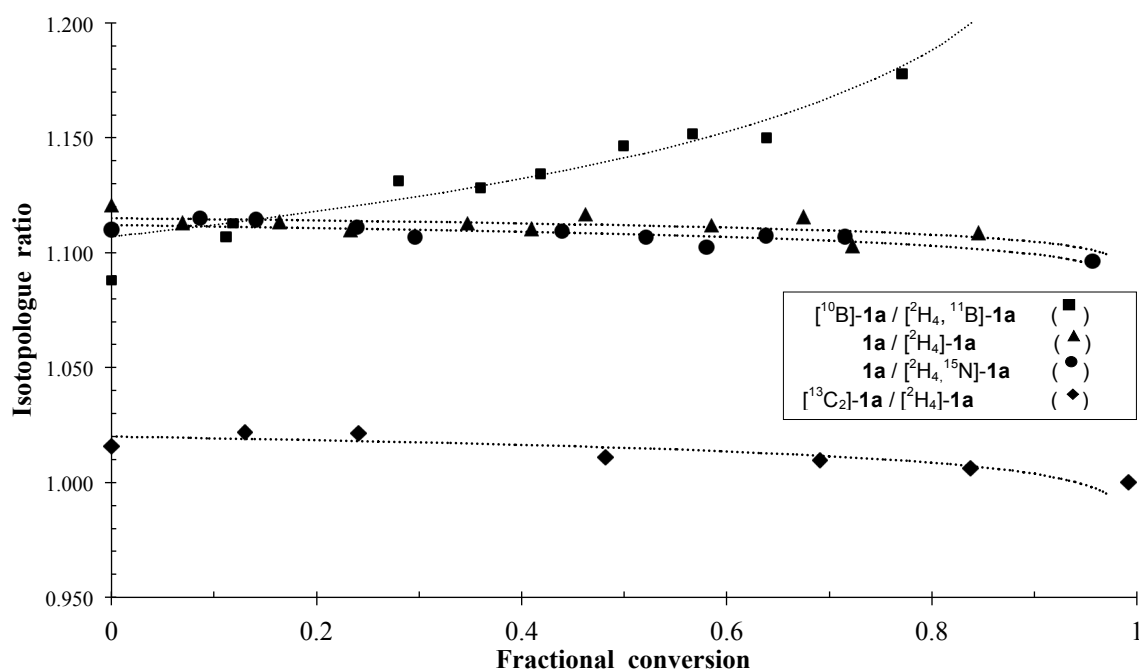

*Figure 25. KIE determination in fast release conditions.*

## VIII. Acid promoted hydrolysis

### Order in acid

A 5 mL solution was prepared with **1a** (130.94 mg, 0.523 mmol), 4-trifluoromethylbromobenzene (18.2 mg, 0.081 mmol) and THF. From this solution, aliquots (0.500 mL) were placed in NMR tubes. Then, an aqueous solution of HCl (0.3 – 6 M, 0.100 mL) was added to the system, the solution was vigorously shaken for 1 minute and a capillary full with DMSO- $d_6$  was inserted in the NMR tube.

An initial  $^{19}\text{F}$  NMR experiment was run and subsequent experiments were recorded at different times. In all cases a pseudofirst order rate constant was calculated from the gradient at plotting plotting  $\text{Ln}\{[\text{Ar}_\text{F}\text{B}(\text{MIDA})]_0/[\text{ArB}(\text{MIDA})]\}$  vs time at different  $[\text{HCl}]$ . The  $k_{\text{obs}}$  values are summarized below.

| Entry | $[\text{HCl}]$ | $k_{\text{obs}} / \text{s}^{-1}$ | $R^2$ |
|-------|----------------|----------------------------------|-------|
| 1     | 0              | $1.76 \times 10^{-5}$            | 0.99  |
| 2     | 0.051          | $1.59 \times 10^{-5}$            | 0.99  |
| 3     | 0.102          | $1.73 \times 10^{-5}$            | 0.99  |
| 4     | 0.203          | $2.05 \times 10^{-5}$            | 0.99  |
| 5     | 0.407          | $3.30 \times 10^{-5}$            | 0.99  |
| 6     | 0.813          | $7.62 \times 10^{-5}$            | 0.99  |
| 7     | 1.017          | $9.38 \times 10^{-5}$            | 0.99  |

**Table 14.** Pseudo-first order rate constants for hydrolysis of **1a** aryl MIDA boronates in THF/ $\text{H}_2\text{O}$  (5:1 v/v) at 21 °C in presence of HCl.

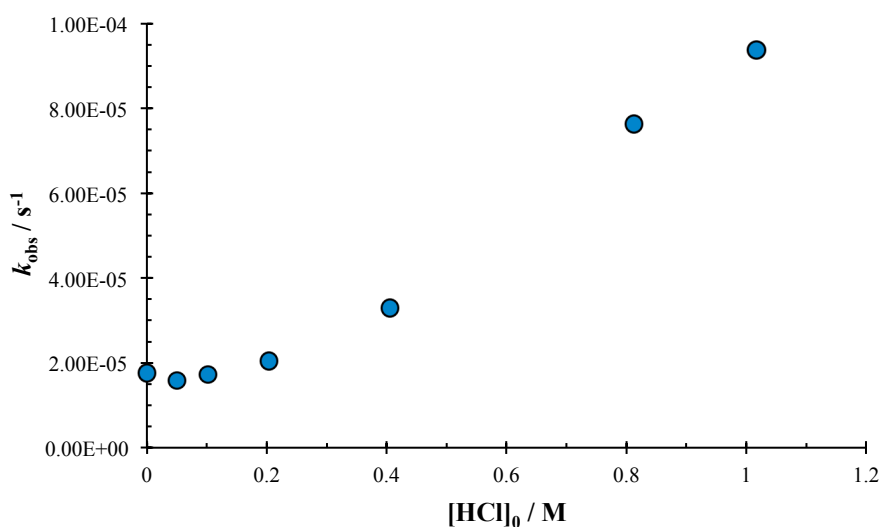

**Figure 26** Pseudo-first order rate constants for hydrolysis of **1a** aryl MIDA boronates in THF/ $\text{H}_2\text{O}$  (5:1 v/v) at 21 °C in presence of HCl.

## Hammett Plot

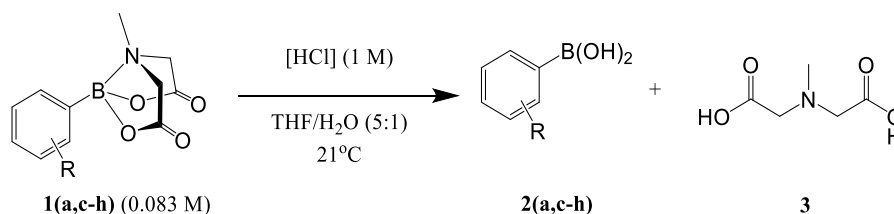

The aryl MIDA boronate (0.05 mmol) was placed in a J-Young valve NMR tube with THF (0.5 mL). The sample was vigorously shaken and then an aqueous HCl solution (0.1 mL, 6 M) added and the tube shaken again for 30 seconds. A capillary with DMSO- $d_6$  was inserted in the tube and the hydrolysis reaction was followed by  $^{11}\text{B}$  NMR. Experiments were recorded every hour up to 98 % of conversion for each substrate. Since the system was homogeneous,  $^{11}\text{B}$  was used to calculate the conversions. Pseudo-first order rate constants ( $k_{\text{obs}}$ ) were calculated at plotting  $\ln\{[\text{Ar}_\text{F}\text{B(MIDA)}]_0/[\text{Ar}_\text{F}\text{B(MIDA)}]\}$  vs time. The  $k_{\text{obs}}$  values are presented in Table 15. Due to the background reaction ( $\text{H}_2\text{O}$  promoted hydrolysis) a correction was applied (data Table 8) to obtain the rates of the acid promoted hydrolysis.

| Substrate | R-                         | $\sigma_{\text{Hammett}}$ | $k_0 + k_{\text{H}}[\text{HCl}]$<br>/ $\text{s}^{-1}$ | $k_0 / \text{s}^{-1}$ | $k_{\text{H}}[\text{HCl}]$<br>/ $\text{s}^{-1}$ | $\log(k_{\text{Hrel}})$ |
|-----------|----------------------------|---------------------------|-------------------------------------------------------|-----------------------|-------------------------------------------------|-------------------------|
| <b>1c</b> | 4- $\text{CH}_3\text{O}$ - | -0.27                     | $8.46 \times 10^{-5}$                                 | $6.6 \times 10^{-6}$  | $7.8 \times 10^{-5}$                            | -0.016                  |
| <b>1d</b> | 4- $\text{CH}_3$ -         | -0.14                     | $1.17 \times 10^{-4}$                                 | $1.2 \times 10^{-5}$  | $1.1 \times 10^{-4}$                            | 0.12                    |
| <b>1e</b> | H-                         | 0                         | $9.63 \times 10^{-5}$                                 | $1.5 \times 10^{-5}$  | $8.1 \times 10^{-5}$                            | 0                       |
| <b>1a</b> | 4-F-                       | 0.15                      | $1.18 \times 10^{-4}$                                 | $1.8 \times 10^{-5}$  | $1.0 \times 10^{-4}$                            | 0.10                    |
| <b>1f</b> | 4- $\text{CF}_3$ -         | 0.53                      | $1.52 \times 10^{-4}$                                 | $4.2 \times 10^{-5}$  | $1.1 \times 10^{-4}$                            | 0.13                    |
| <b>1g</b> | 3- $\text{NO}_2$ -         | 0.71                      | $1.39 \times 10^{-4}$                                 | $4.7 \times 10^{-5}$  | $9.2 \times 10^{-5}$                            | 0.05                    |
| <b>1h</b> | 3-( $\text{CF}_3$ ) $_2$ - | 0.92                      | $1.52 \times 10^{-4}$                                 | $7.4 \times 10^{-5}$  | $7.8 \times 10^{-5}$                            | -0.02                   |

**Table 15** Rate constants for aryl MIDA boronate hydrolysis in 6M HCl, THF/ $\text{H}_2\text{O}$  at 21°C.

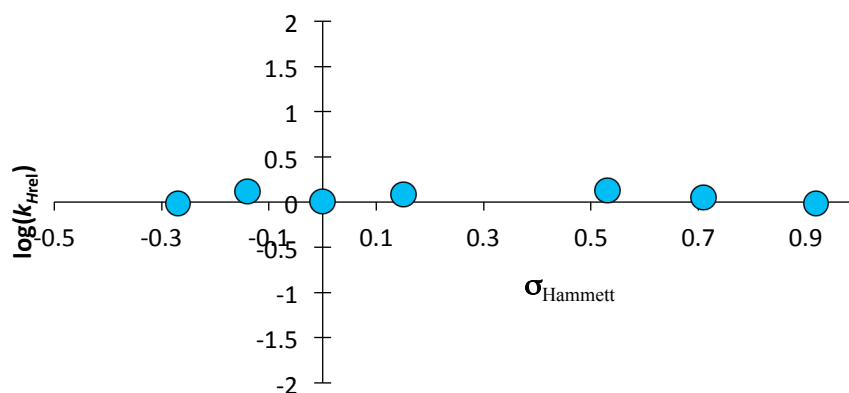

**Figure 27.** Hammett plot: acid hydrolysis (1 M HCl in THF/ $\text{H}_2\text{O}$  (5:1 v/v) at 21 °C)

**Kinetic isotope measurements**

A 25 mL solution was made up with 4-CF<sub>3</sub>PhBr (41.47 mg, 0.184 mmol) in degassed THF. Then a sample (0.50 mL) of the solvent solution was transferred to J-Young valve NMR tube containing a mixture of the isotopologues (approximately 0.024 mmol of each isotopologue). The sample was vigorously shaken and a capillary with DMSO-d<sub>6</sub> was placed in the tube before running the initial <sup>19</sup>F NMR experiment. An aqueous solution of HCl (0.10 mL, 6 M) was added to the solution in the NMR tube and shaken again for 30 seconds. The sample was inserted in the spectrometer at 21 °C and <sup>19</sup>F NMR spectra recorded every 15 minutes for 12 h. Spectra were processed, phased and baseline corrected. Integrations of the starting materials and products were compared against the internal to calculate isotopologue ratio and fractional conversion. Experimental KIEs were corrected for approximately 19 % contribution from H<sub>2</sub>O promoted hydrolysis.

| Entry | Reagents                                                                                                  | KIE                              | Measured | Corrected |
|-------|-----------------------------------------------------------------------------------------------------------|----------------------------------|----------|-----------|
| 1     | [ <sup>10</sup> B]- <b>1a</b> / [ <i>aryl</i> - <sup>2</sup> H <sub>4</sub> , <sup>11</sup> B]- <b>1a</b> | <sup>10</sup> B/ <sup>11</sup> B | 1.008    | 0.999     |
| 2     | [1- <sup>13</sup> C <sub>2</sub> ]- <b>1a</b> / [ <i>aryl</i> - <sup>2</sup> H <sub>4</sub> ]- <b>1a</b>  | <sup>12</sup> C/ <sup>13</sup> C | 1.036    | 1.041     |
| 3     | <b>1a</b> / [ <i>aryl</i> - <sup>2</sup> H <sub>4</sub> , <sup>15</sup> N]- <b>1a</b>                     | <sup>14</sup> N/ <sup>15</sup> N | 1.004    | 0.998     |
| 4     | <b>1a</b> / [ <i>aryl</i> - <sup>2</sup> H <sub>4</sub> ]- <b>1a</b>                                      | <sup>1</sup> H/ <sup>2</sup> H   | 1.001    | 0.997     |

**Table 16** KIE data for hydrolysis in HCl (1M); corrected for H<sub>2</sub>O promoted hydrolysis.

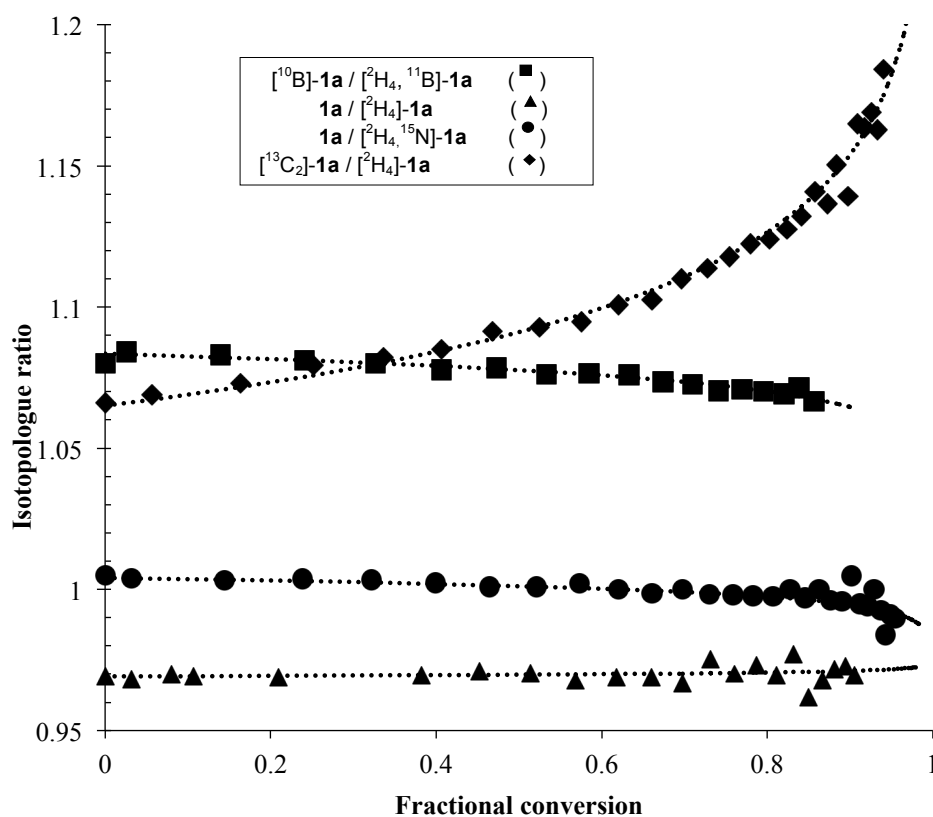

**Figure 28** - Isotopologue ratio versus conversion for acidic hydrolysis (pH = 0).



## IX. Tests for "open-1a"

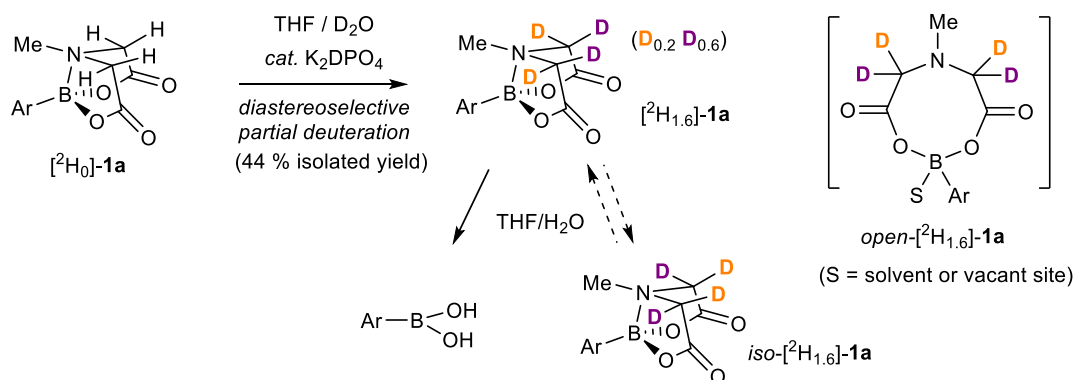*Equilibrium vs hydrolysis*

A 1 mL solvent stock solution was prepared with (4-CF<sub>3</sub>PH)<sub>2</sub> (0.60 mg, 0.002 mmol), D<sub>2</sub>O (10.98 mg, 0.549 mmol) and THF-d<sub>8</sub>. Then [*methylene*-<sup>2</sup>H<sub>1.6</sub>]-**1a** (0.043 mmol) was placed in a J-Young valve NMR tube with the solvent solution (0.5 mL). The hydrolysis reaction was followed by <sup>1</sup>H NMR over a week, the sample being kept at 21° C. The spectra were analysed: the integration of the internal standard and the aromatic protons were used to monitor the hydrolysis reaction while the signal of the methylene protons was compared against the signal of the aromatic protons to calculate the equilibration with the diastereomer. A second experiment was run with (4-CF<sub>3</sub>Ph)<sub>2</sub> (0.52 mg, 0.002 mmol), D<sub>2</sub>O (184.43 mg, 9.22 mmol) and THF-d<sub>8</sub> to make up 1 mL stock solution. A similar analysis compares hydrolysis vs equilibration. The result are summarised below.

| <i>Conditions</i>              | <i>% of equilibration</i> | <i>% of hydrolysis</i> |
|--------------------------------|---------------------------|------------------------|
| 0.55 M D <sub>2</sub> O in THF | Less than 1%              | 52 %                   |
| 9.22 D <sub>2</sub> O in THF   | Less than 1.5 %           | 77 %                   |

**Table 17.** Comparison of hydrolysis and equilibrium of [<sup>2</sup>H<sub>1.6</sub>]-**1a** at room temperature.

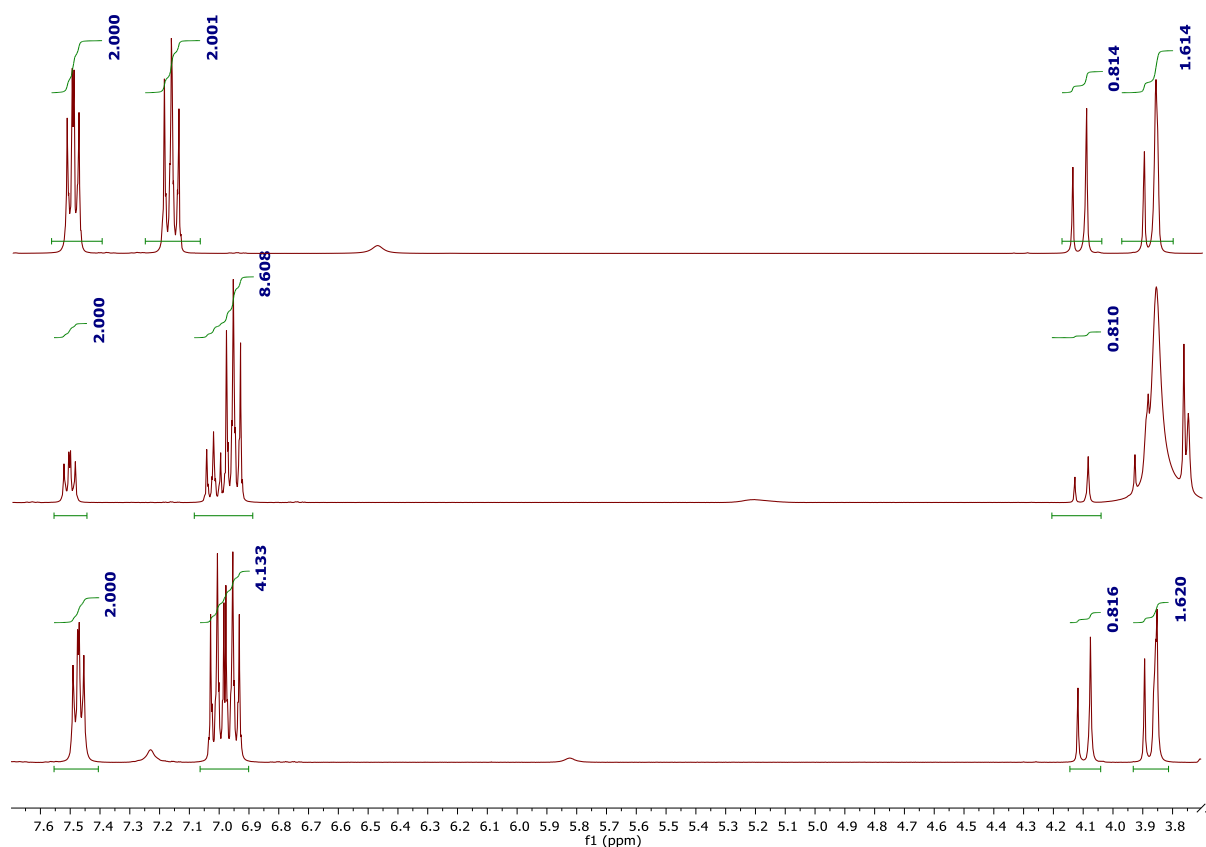

**Fig 29.**  $^1\text{H}$  NMR spectra of the equilibration of  $[\text{methylene-}^2\text{H}_{1,6}]\text{-1a}$ , (aromatic protons were used as an internal standard) **a)** initial spectra in DMSO- $d_6$  **b)** Reaction in THF( $d_8$ )/ $D_2O$  (9.2 M) after 77 % of hydrolysis. **c)** Reaction in THF( $d_8$ )/ $D_2O$  (0.55 M) after 52 % hydrolysis.

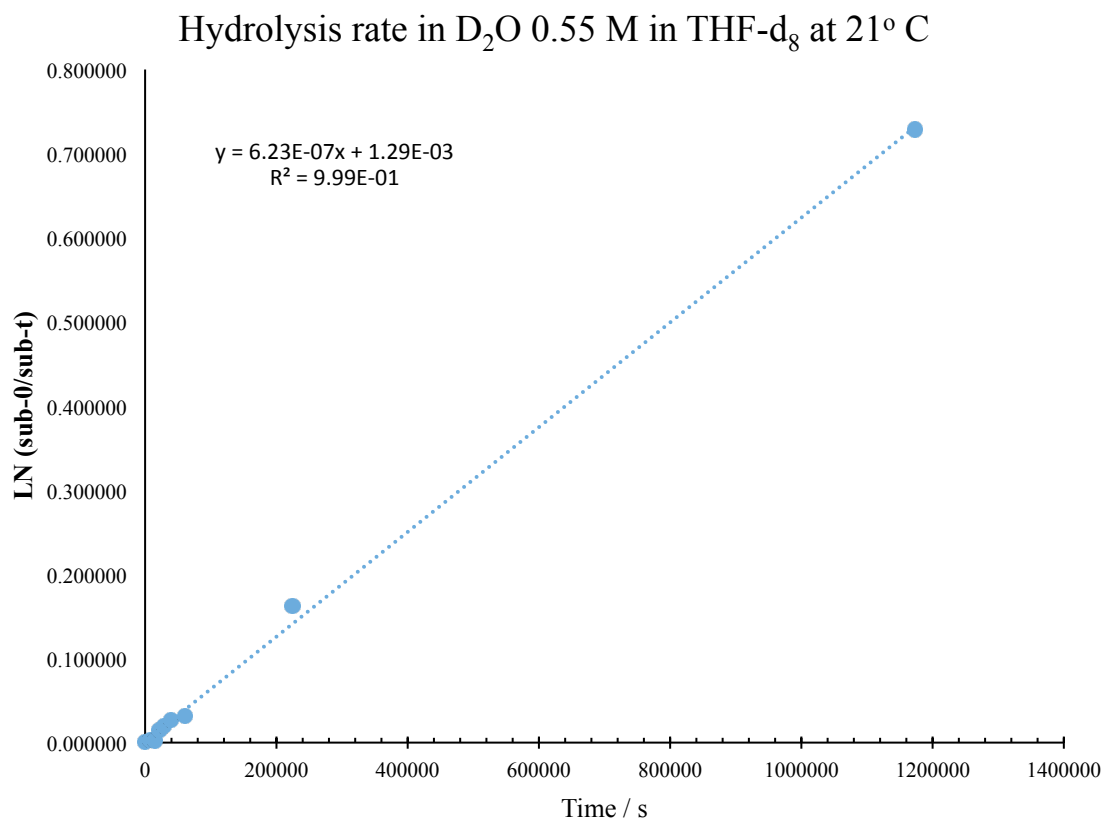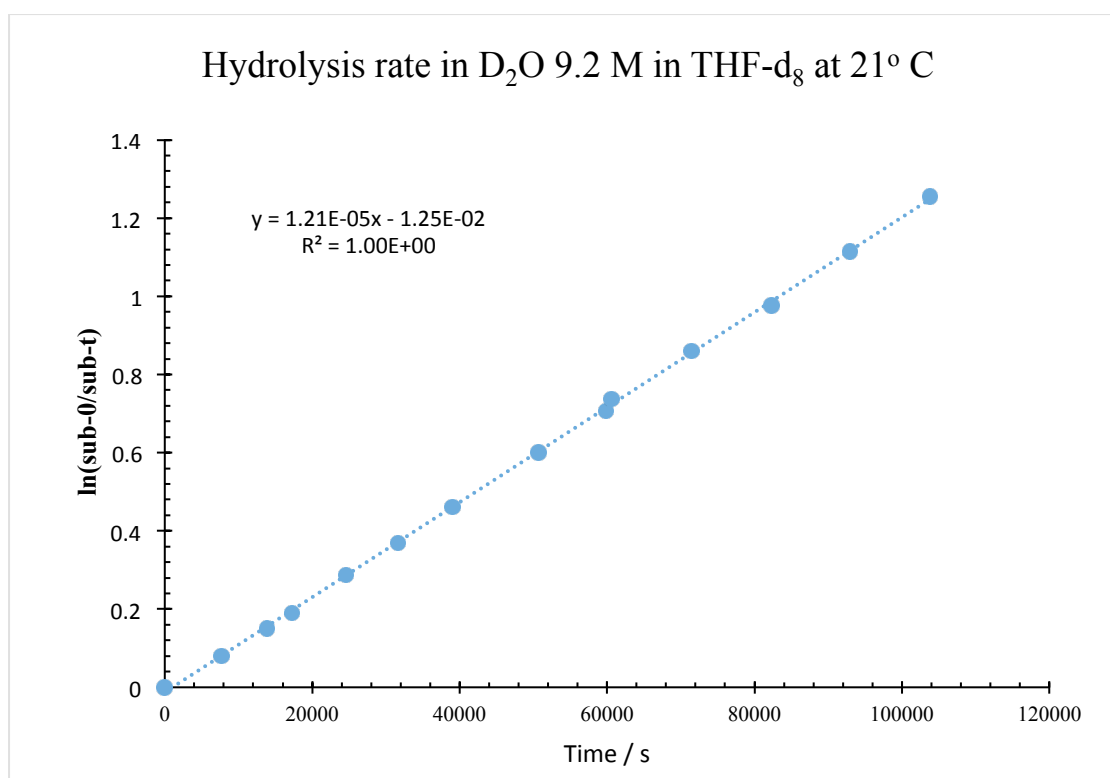

**Figure 30** - Hydrolyses in D<sub>2</sub>O/d<sub>8</sub>-THF; rates are affected by solvent kinetic isotope effects.

## Thermal equilibration

In a J-Young valve NMR tube, [*methylene*- $^2\text{H}_{3,4}$ ]-**1a** (10.3 mg, 0.041 mmol) was dissolved in THF- $\text{d}_8$ . A  $^1\text{H}$  NMR experiment was run for this sample at room temperature. Then, the NMR tube was put in an oil bath ( $100^\circ\text{C}$ ), the sample was removed from the oil bath at specific times, cooled to room temperature and analysed approximately every 90 minutes by  $^1\text{H}$  NMR. The spectra were processed, and the integration of the peaks was used to calculate the molar ratio of all species. Aromatic protons were used as an internal standard to quantify the change in integrations. The amount of hydrolysis was calculated based on the signals in the aromatic region in the  $^1\text{H}$  NMR spectra. Data were fitted to calculate the rate constant of the thermal equilibration, the graph is shown in Fig 31.

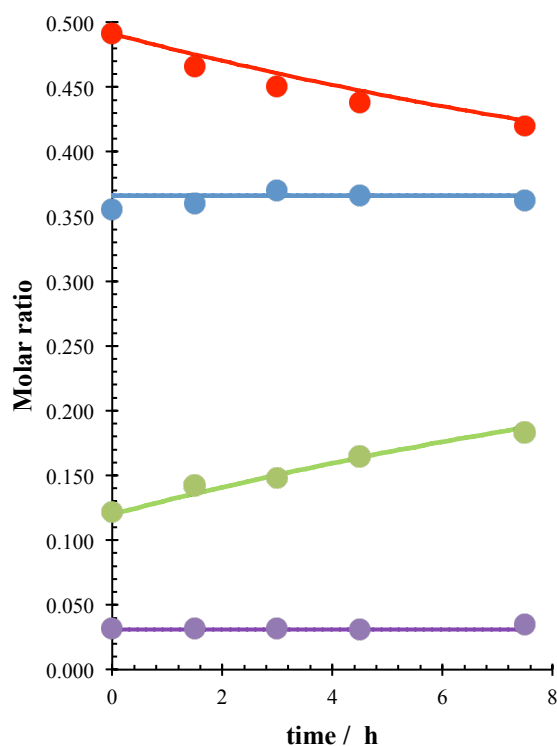

s

**Fig 31.** Thermal equilibration of [*methylene*- $^2\text{H}_{3,4}$ ]-**1a** in THF- $\text{d}_8$  at  $100^\circ\text{C}$ . Hydrolysis was not detected. Blue and Purple data points are CH2 and CD2 signals and are constant, showing there to be no CH/D exchange. Red and green datapoints are CHD and CDH signals.

## X. $T_1$ Measurements and Quantitation

A solution of **1a** (12.25 mg, 0.049 mmol) and  $[aryl\text{-}^2\text{H}_4]\text{-1a}$  (12.27 mg, 0.048 mmol) in THF (0.5 mL) was prepared in a NMR tube. Then a capillary with DMSO- $d_6$  was placed in the tube. The  $T_1$  relaxation time was measured using an inversion recovery experiment. The experiment consists of the relaxation delay, an  $180^\circ$  inversion pulse, delay period  $\tau$ , a  $90^\circ$  pulse and an acquisition time where the data is collected. The logarithmic decay of  $z$ -magnetisation against time is plotted in Figure 32. Once the experiment was finished, water was added to the sample (0.1 mL) and then a second inversion recovery experiment was conducted to measure  $T_1$  under these conditions (THF/H $_2$ O 5:1 v/v) at 21  $^\circ\text{C}$ .

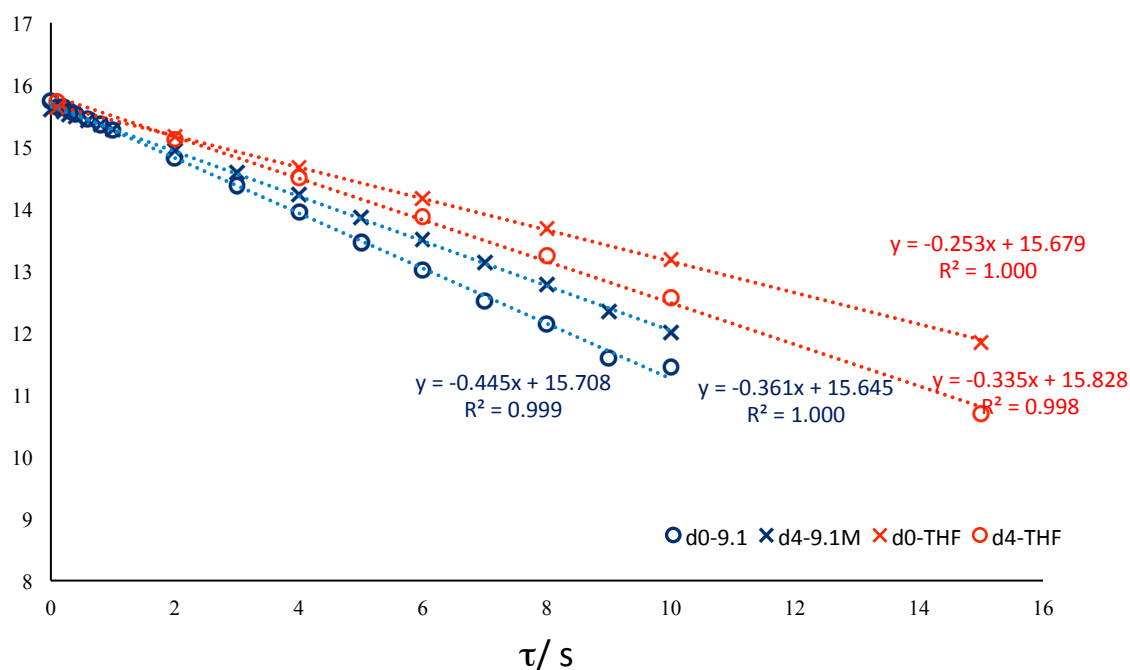

**Fig 32** Inversion recovery experiments on **1a**.

Calculations of  $T_1$  and quantitation in NMR measurements of the species of interest are given below.

|                                                          | <b>T<sub>1</sub> in THF</b> | <b>T<sub>1</sub> in THF/H<sub>2</sub>O</b> |
|----------------------------------------------------------|-----------------------------|--------------------------------------------|
| <b>1a</b>                                                | 3.00 s                      | 2.18 s                                     |
| [ <i>aryl</i> - <sup>2</sup> H <sub>4</sub> ]- <b>1a</b> | 3.95 s                      | 2.99 s                                     |

**Table 18.** T<sub>1</sub> values calculated for **1a** and [*aryl*-<sup>2</sup>H<sub>4</sub>]-**1a**.

The standard <sup>19</sup>F NMR experiment employed for kinetics and KIEs etc. presented herein, consists of a 30° pulse ( $\emptyset$ ) and a delay of 7.5 s ( $T_r$ ), with these parameters and the  $T_1$  measurements, the fraction of the population that is quantified ( $f$ ) can be calculated with the following equation:

$$\text{Ln} \frac{(f - 1)}{(\cos \emptyset - 1)} = -\frac{T_r}{T_1}$$

|                                                          | <b><i>f</i> in THF</b> | <b><i>f</i> in THF/H<sub>2</sub>O</b> |
|----------------------------------------------------------|------------------------|---------------------------------------|
| <b>1a</b>                                                | 0.99                   | 0.99                                  |
| [ <i>aryl</i> - <sup>2</sup> H <sub>4</sub> ]- <b>1a</b> | 0.98                   | 0.99                                  |

**Table 19.** Estimation of fractional quantitation of **1a** and [*aryl*-<sup>2</sup>H<sub>4</sub>]-**1a** by <sup>19</sup>F NMR.

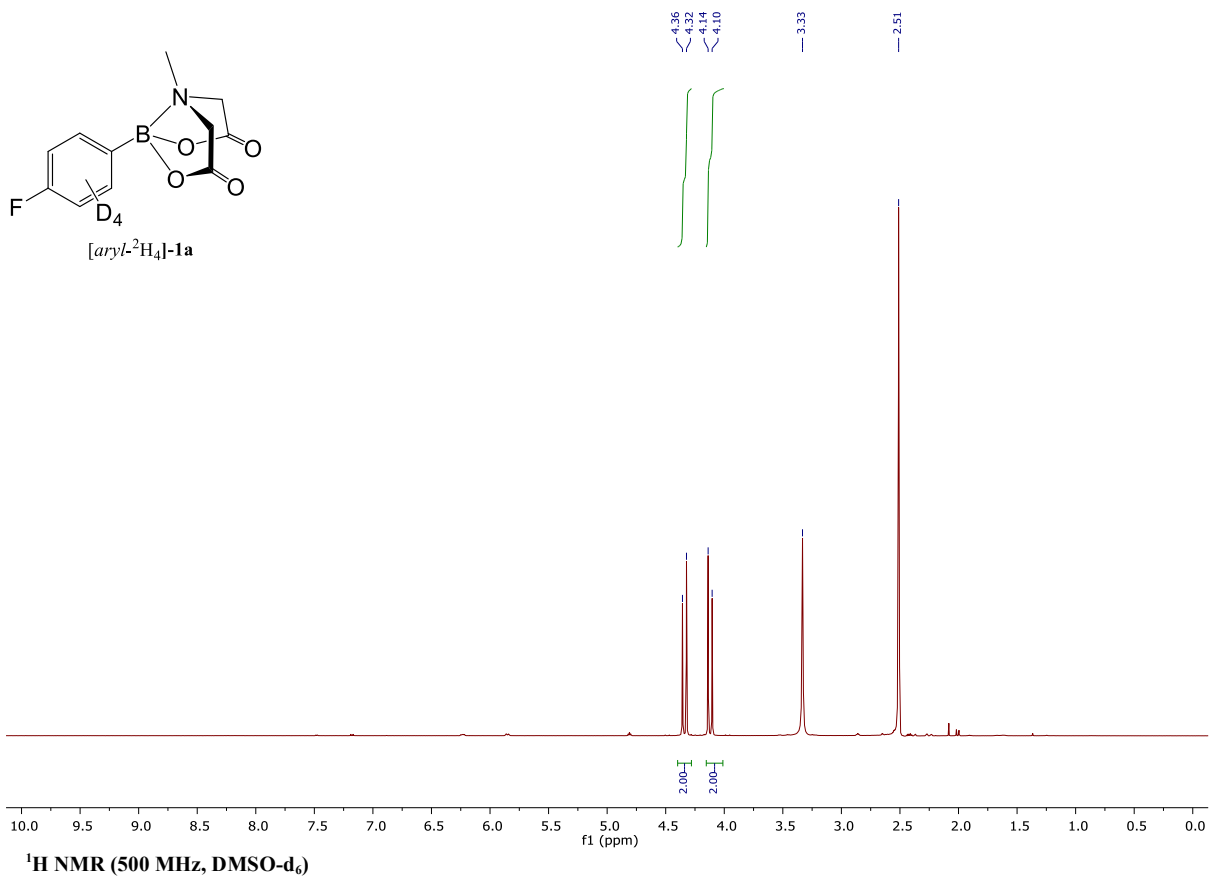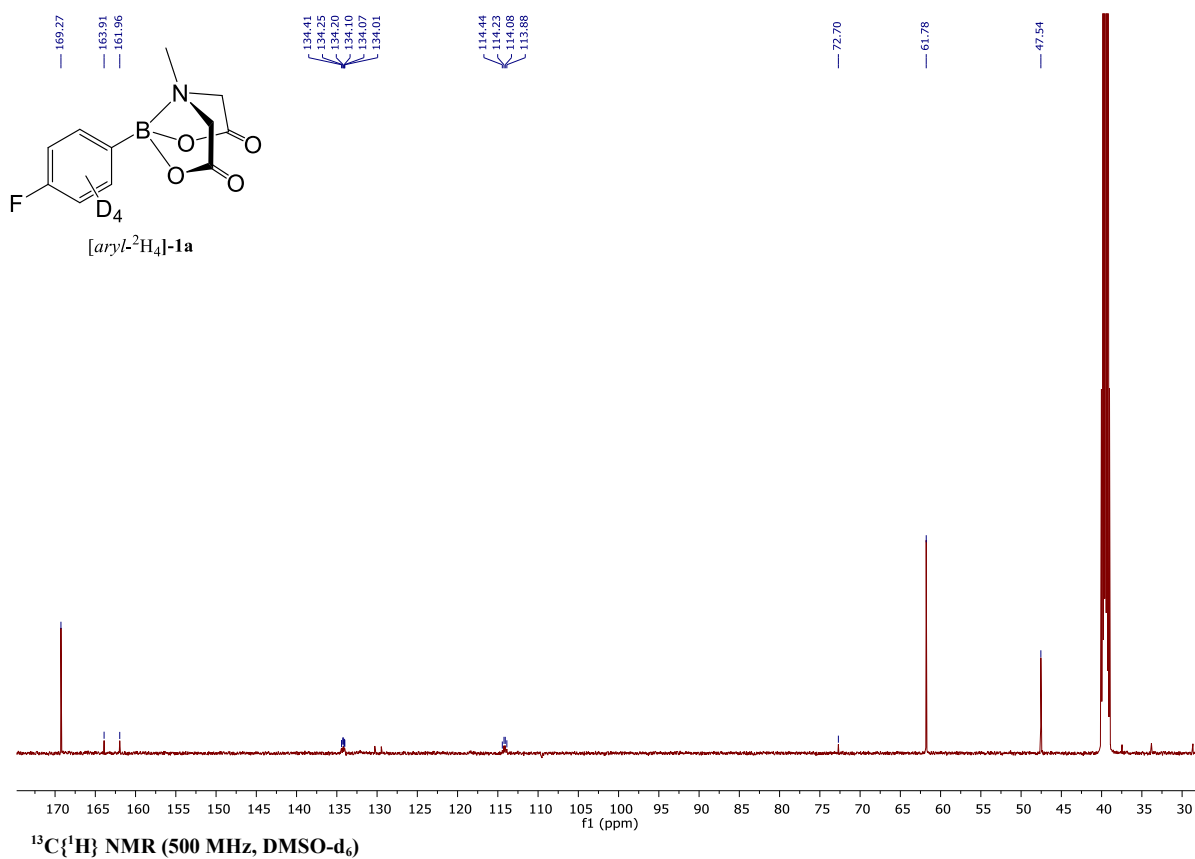

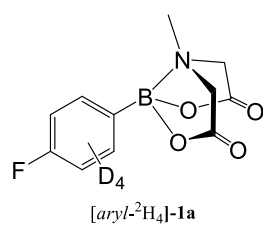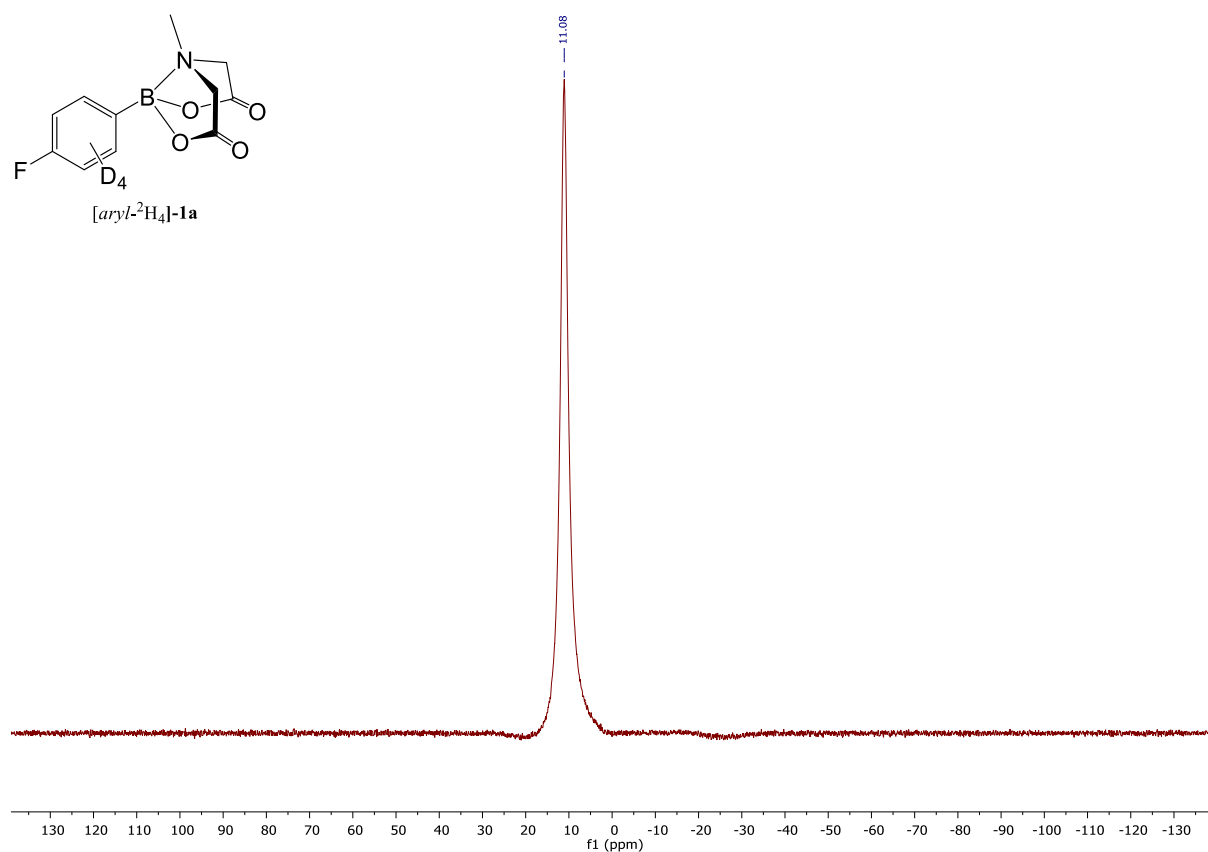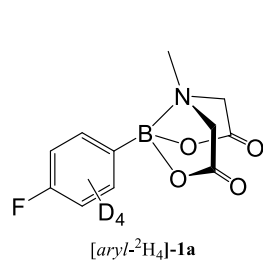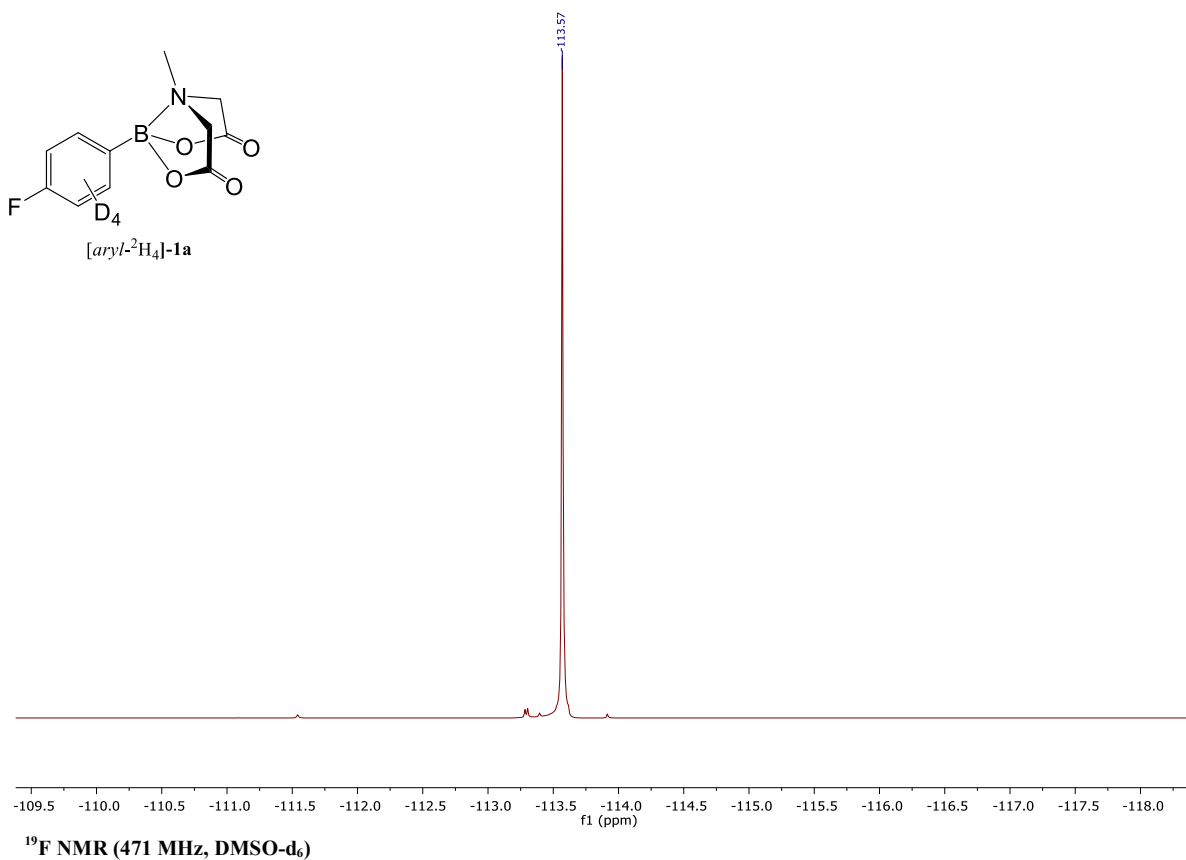



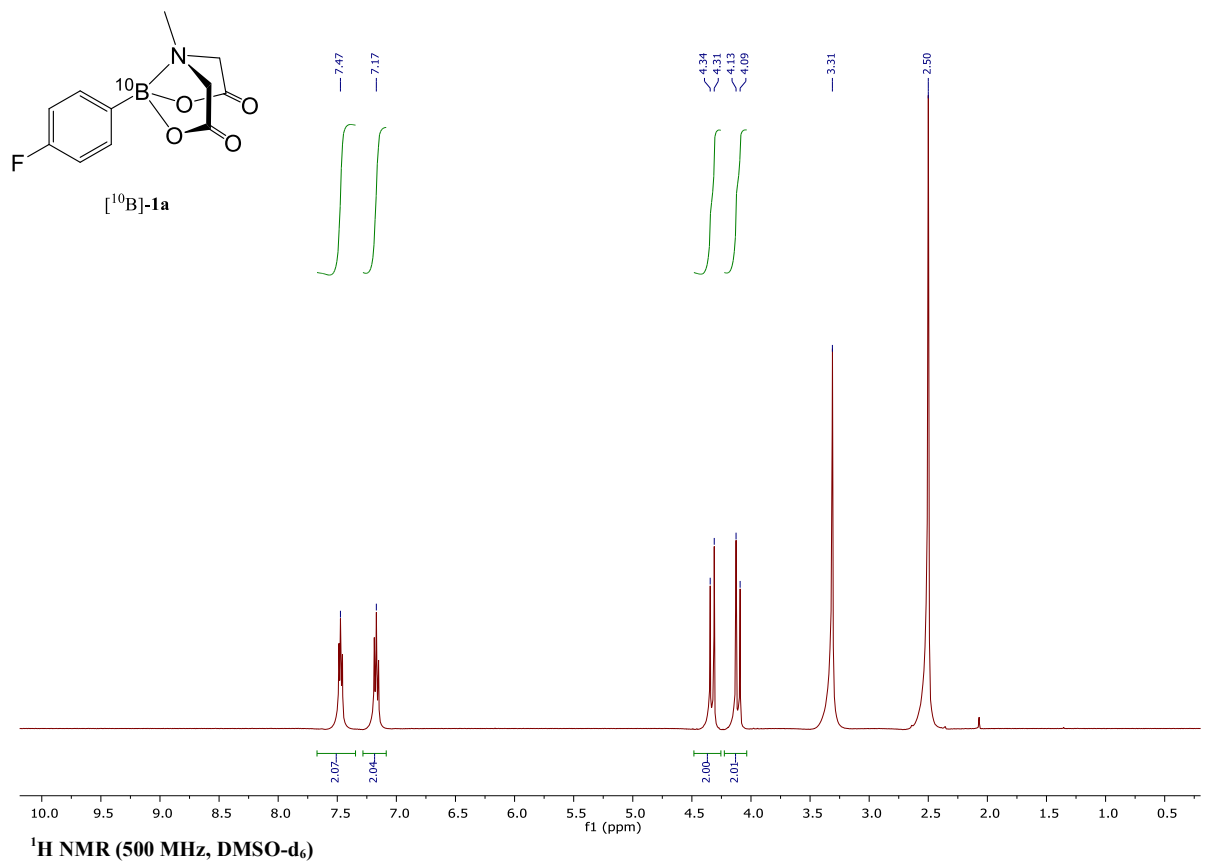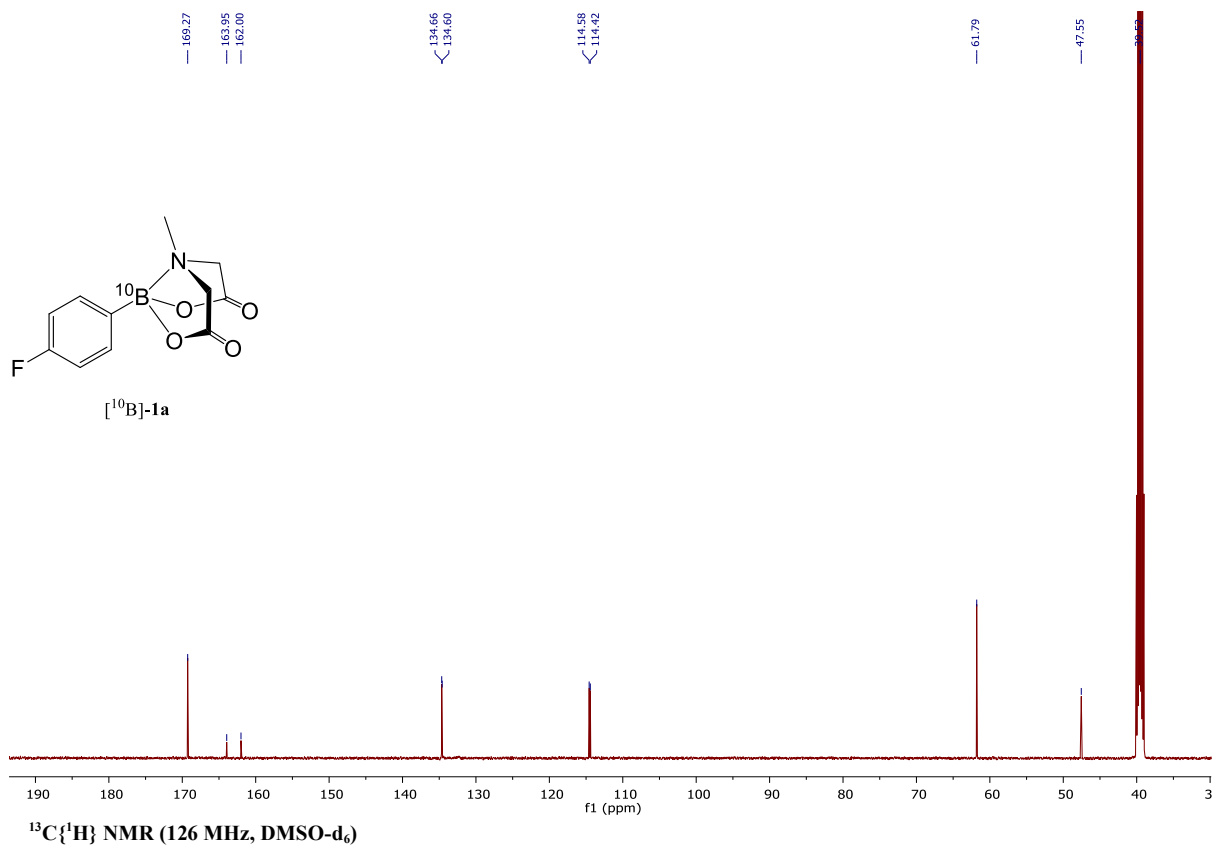

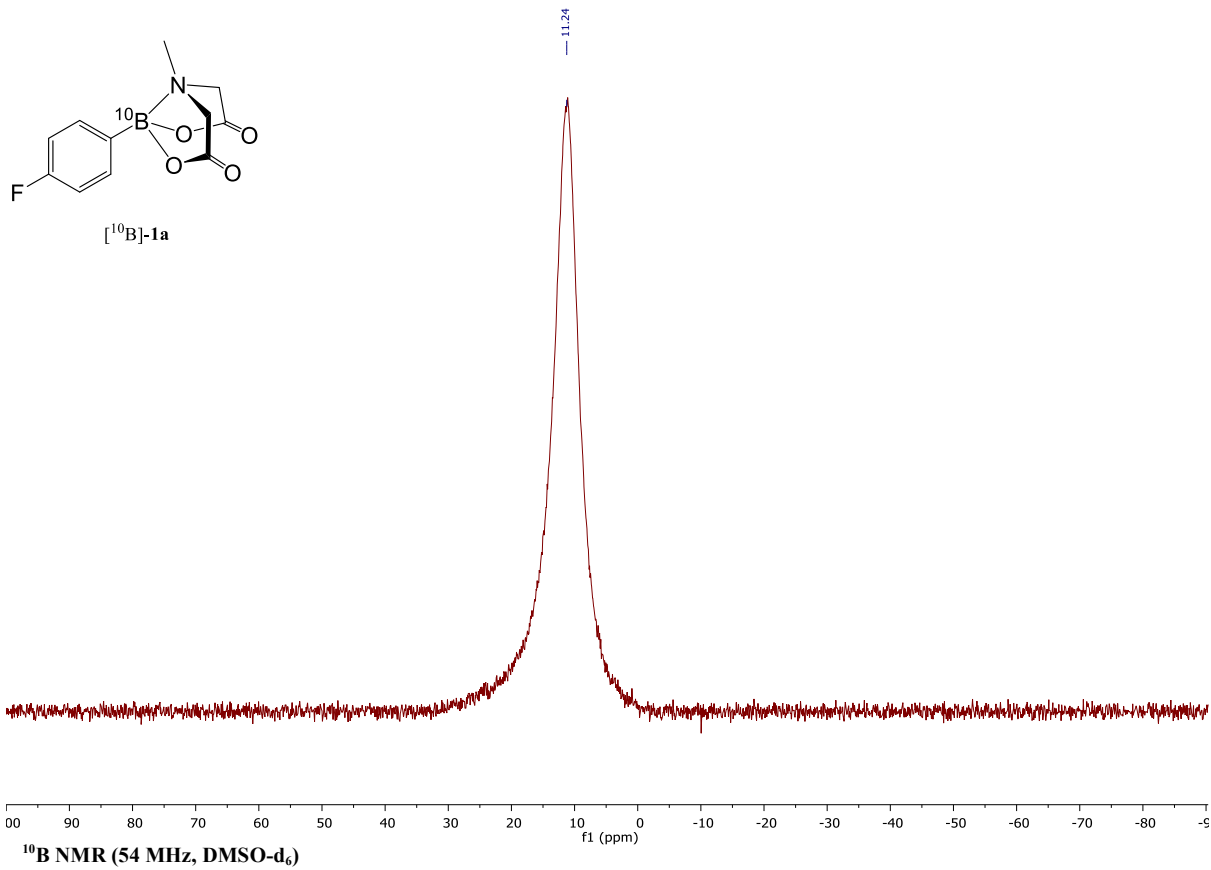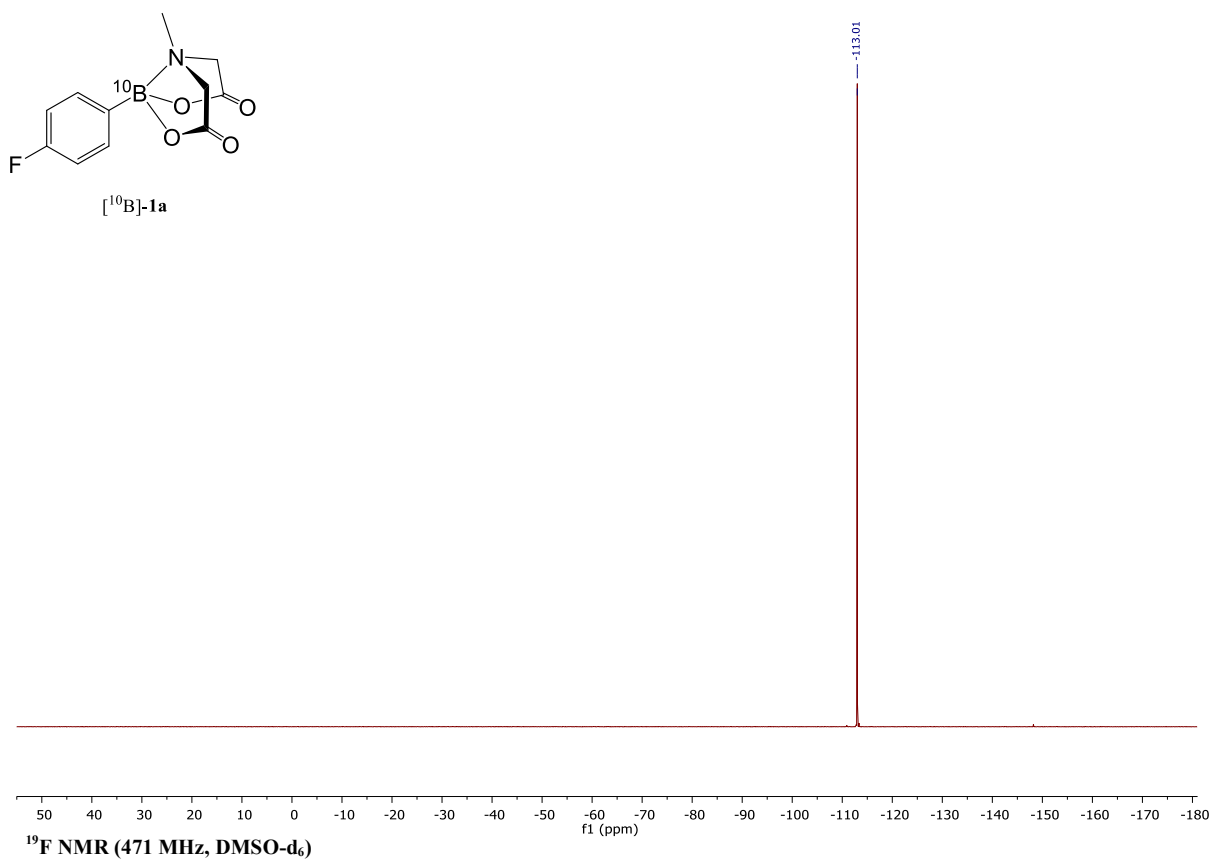

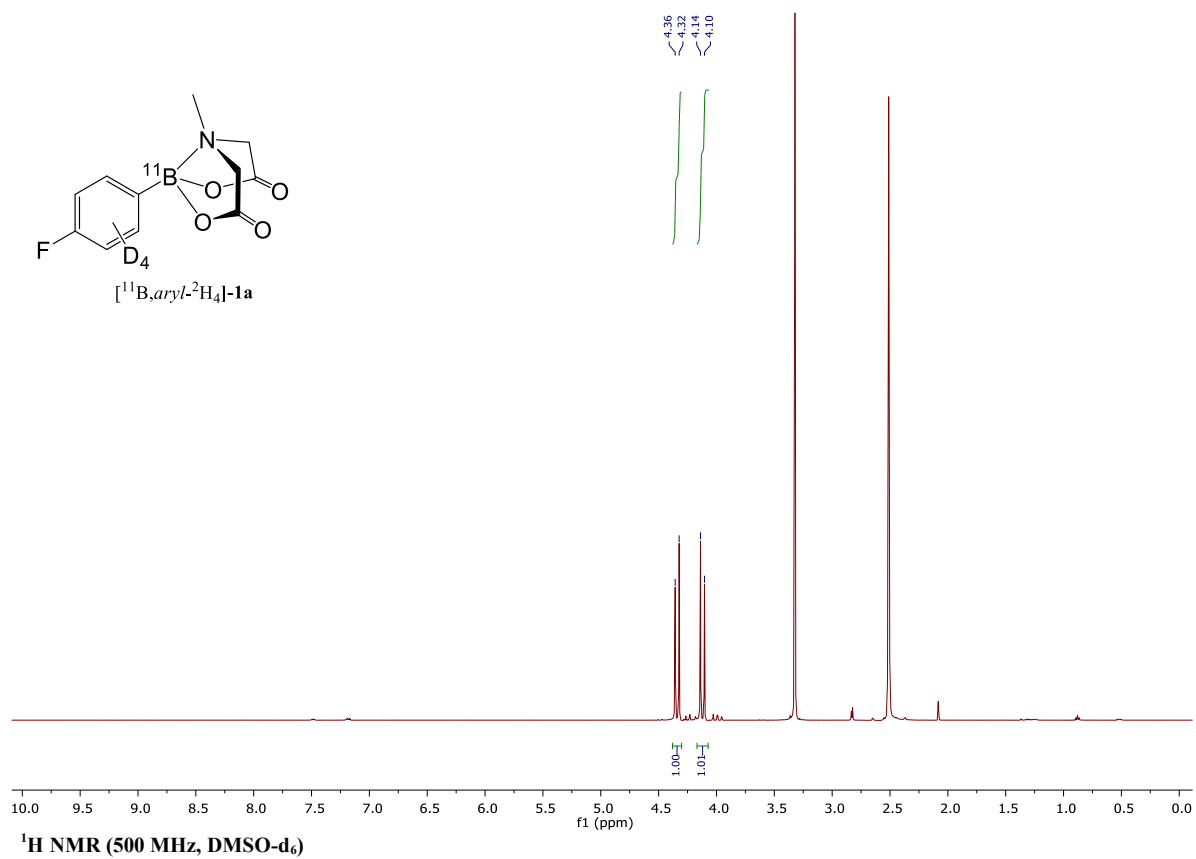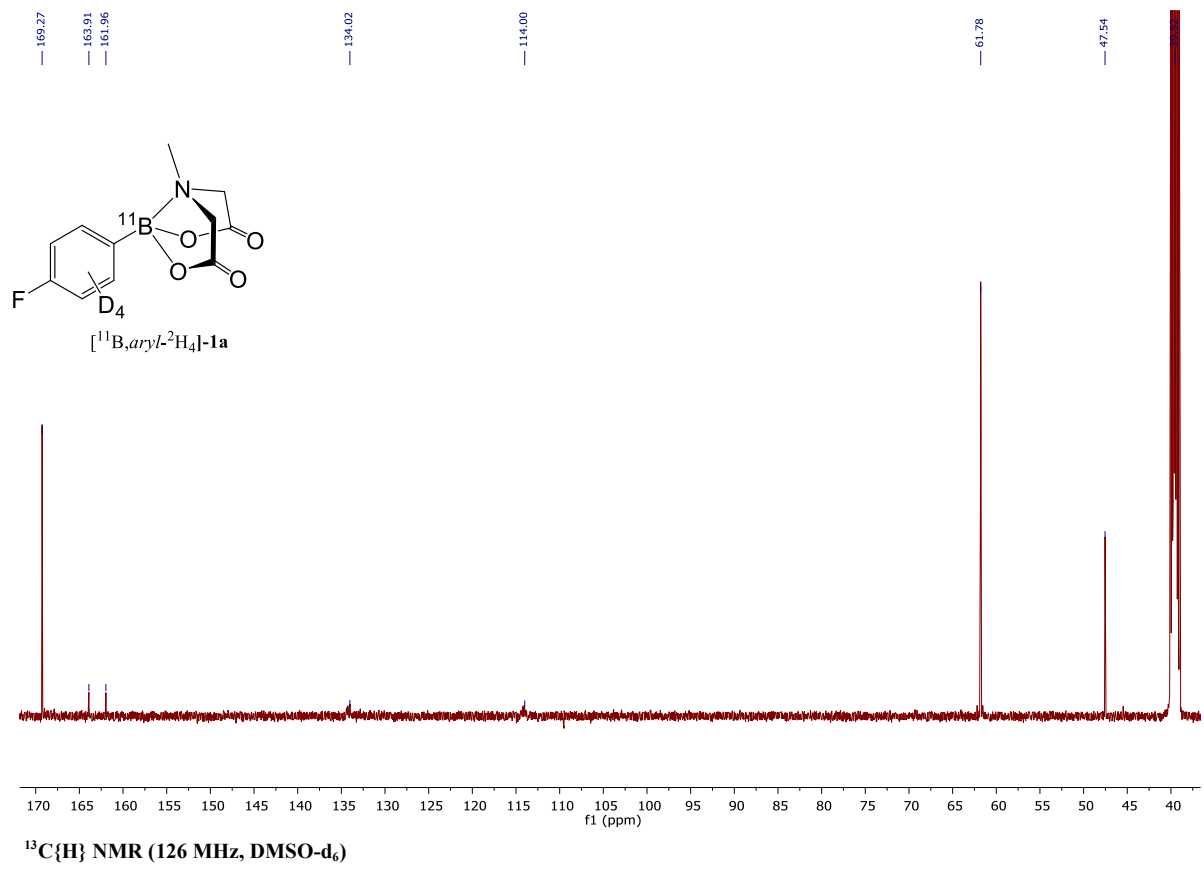

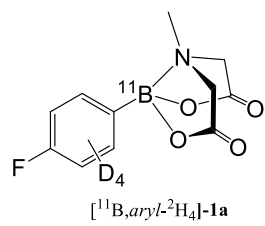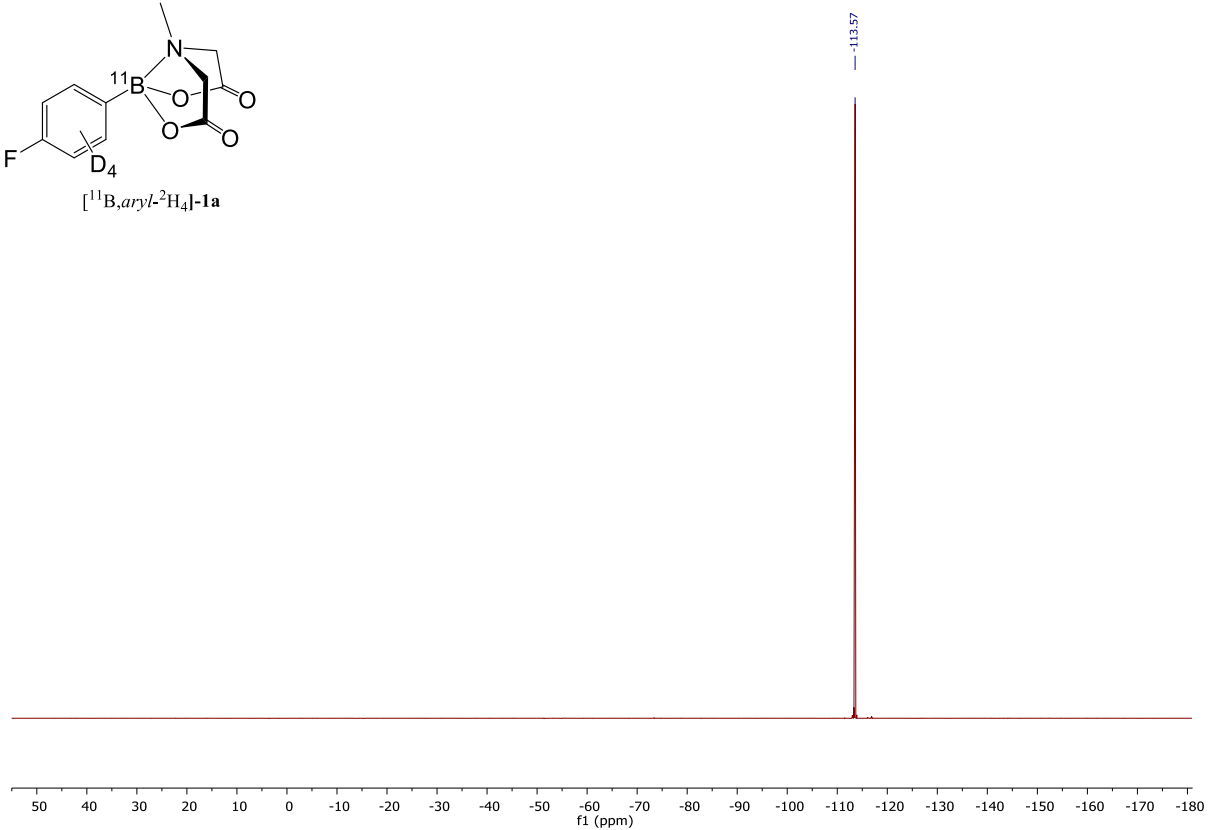

<sup>19</sup>F NMR (471 MHz, DMSO-d<sub>6</sub>)

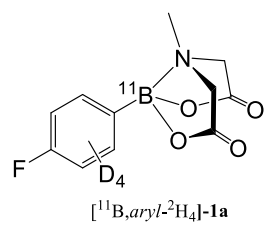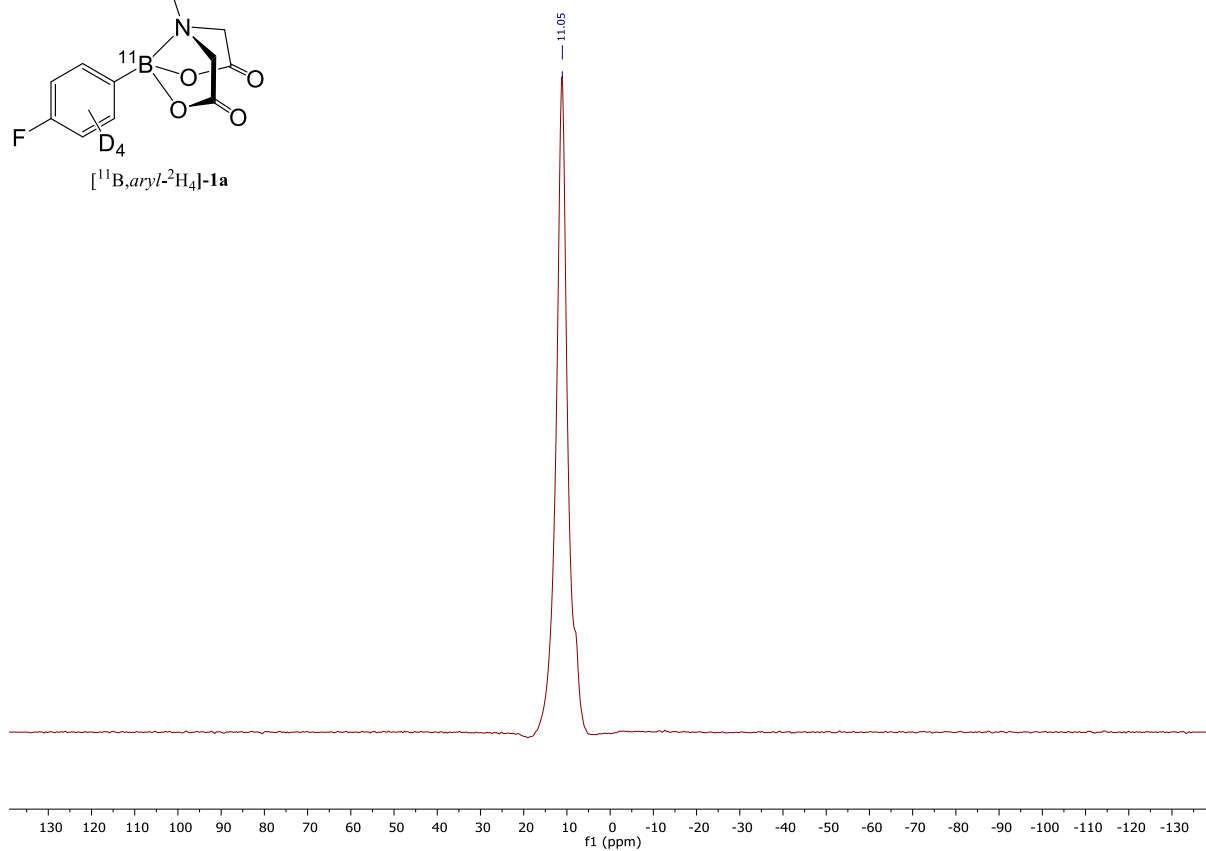

<sup>11</sup>B NMR (160 MHz, DMSO-d<sub>6</sub>)

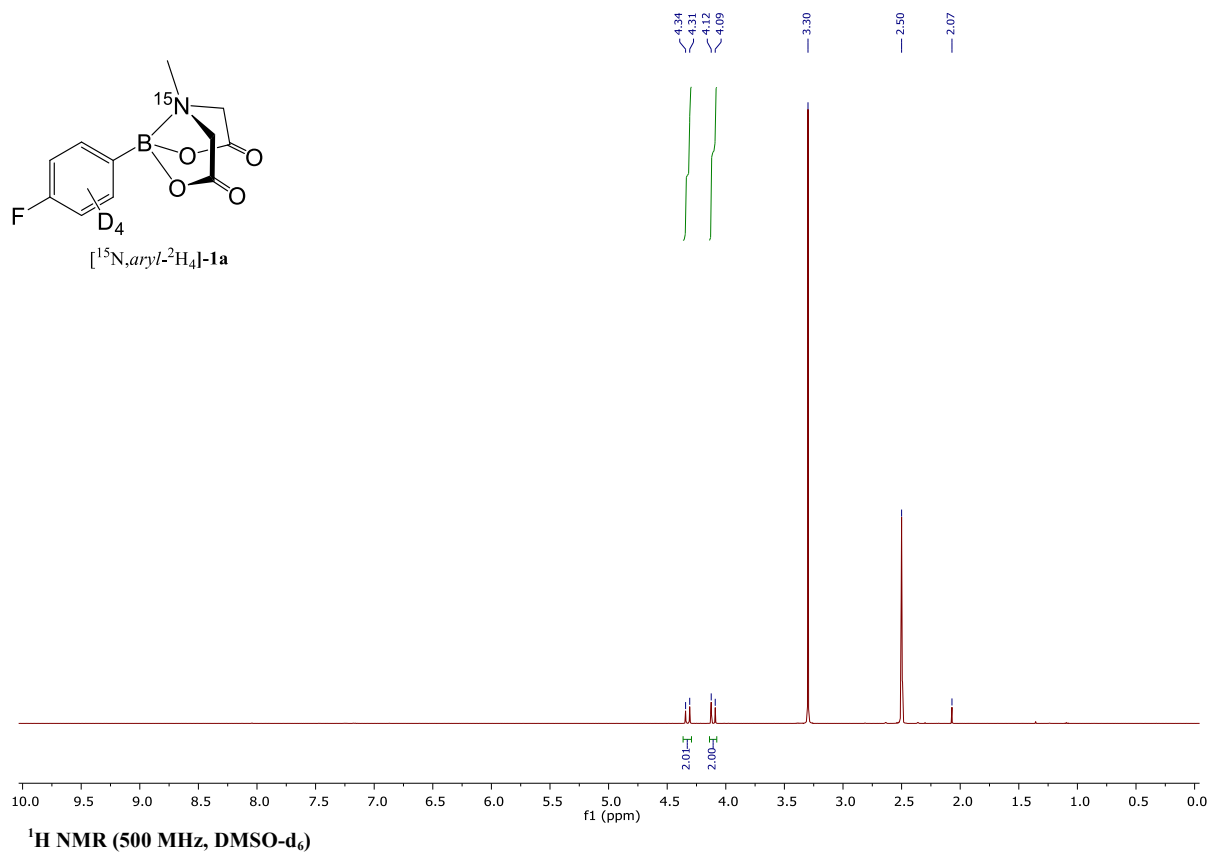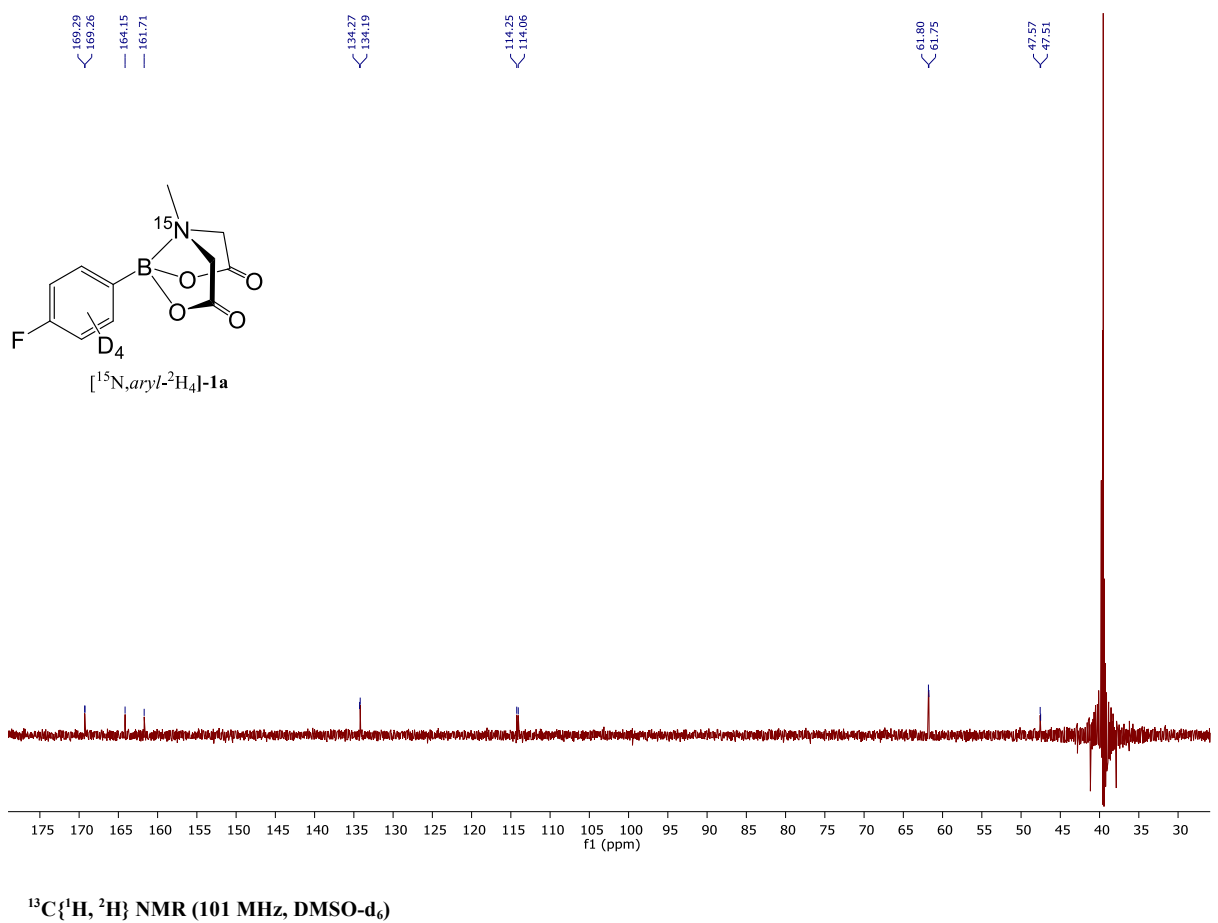

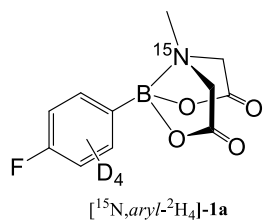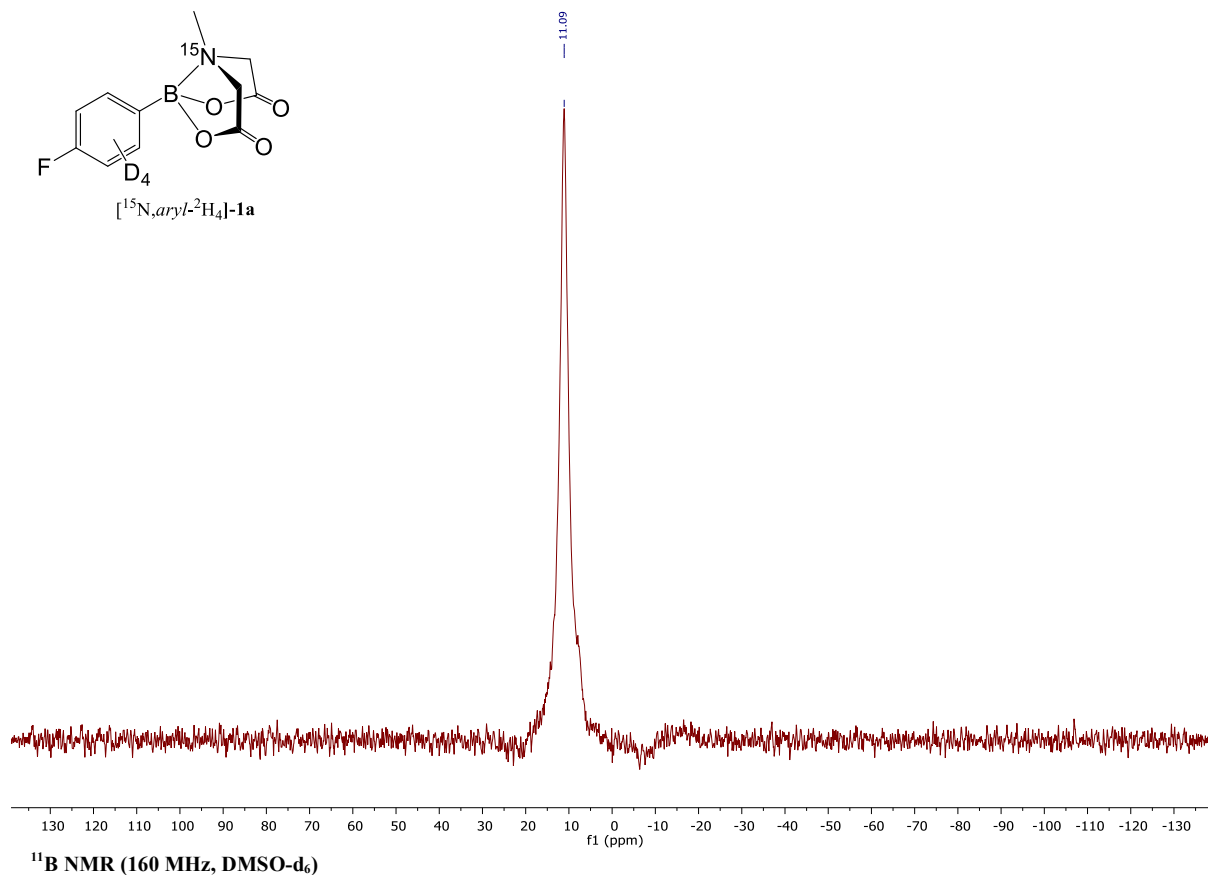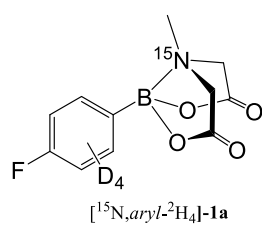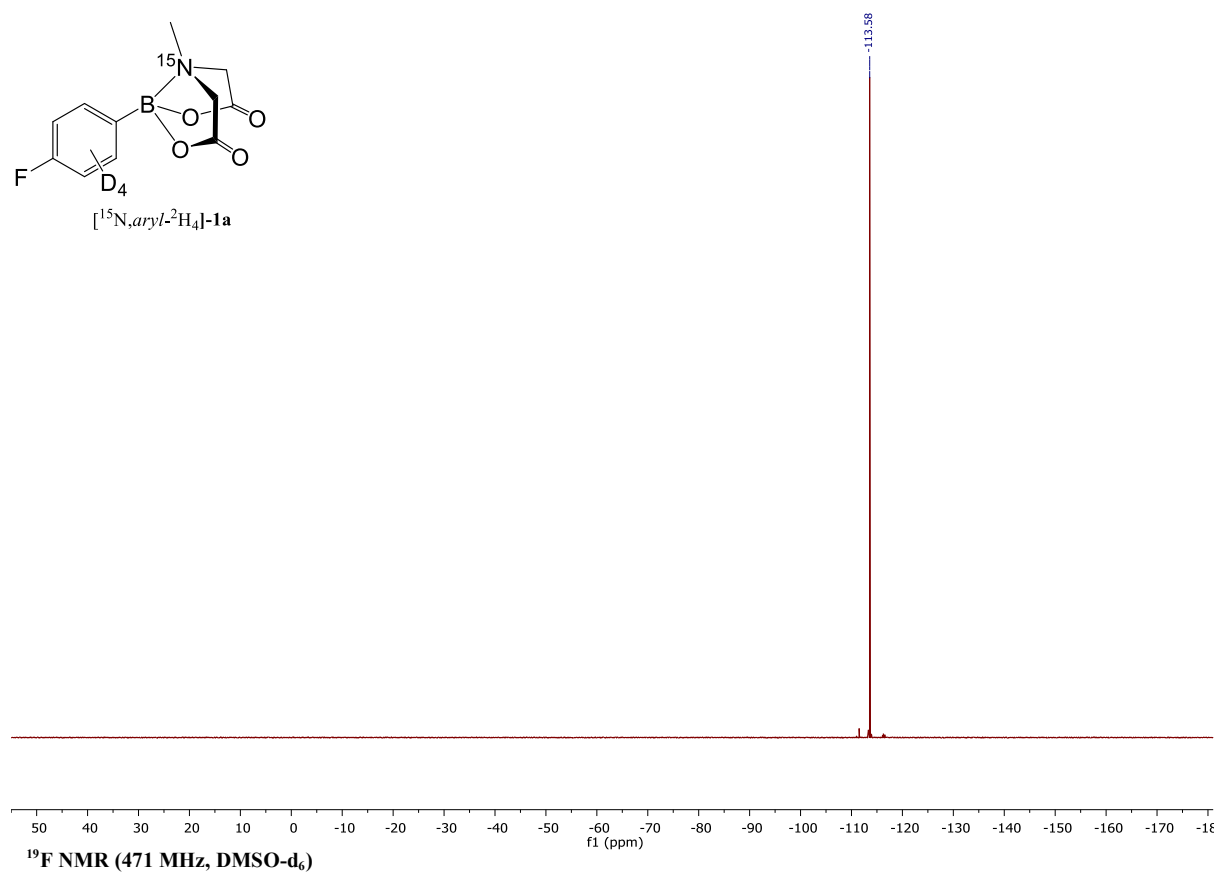

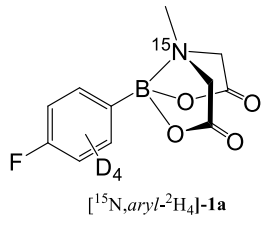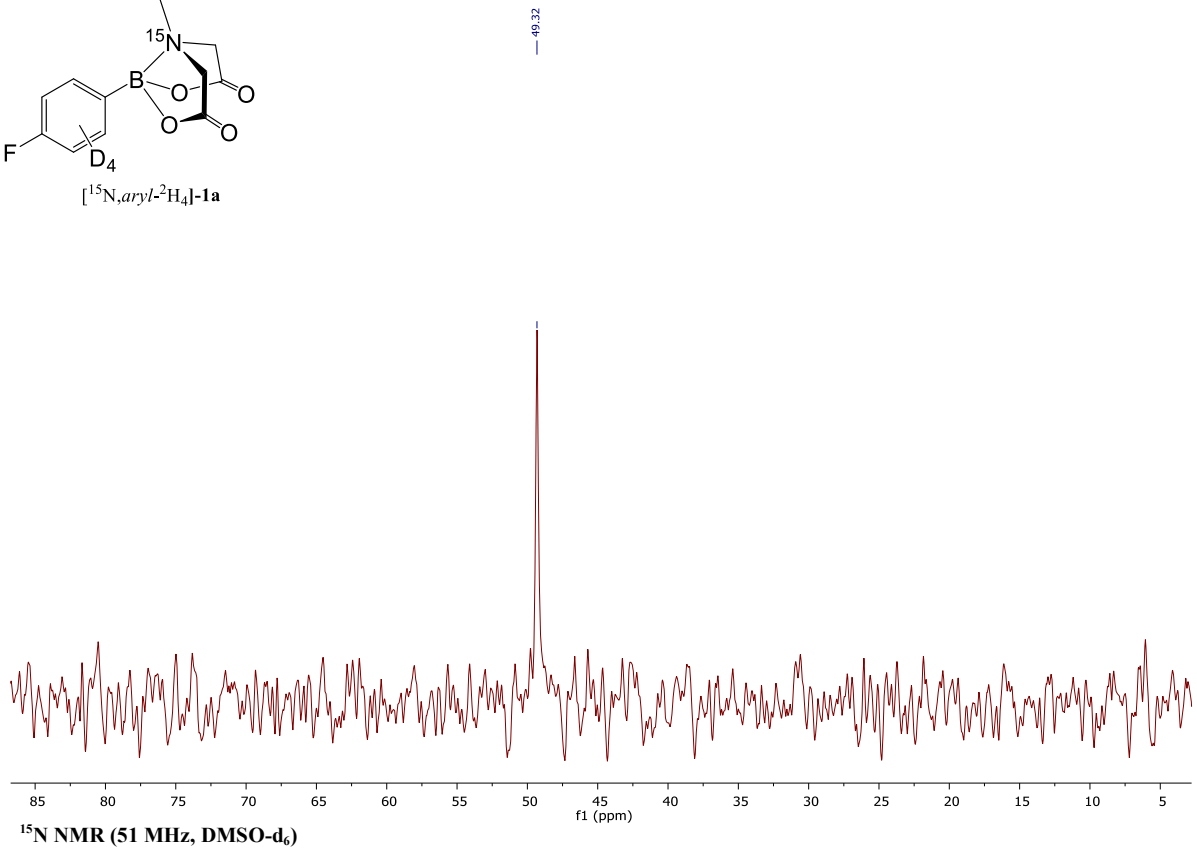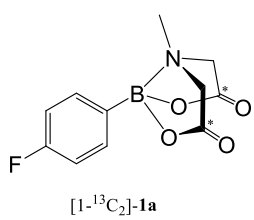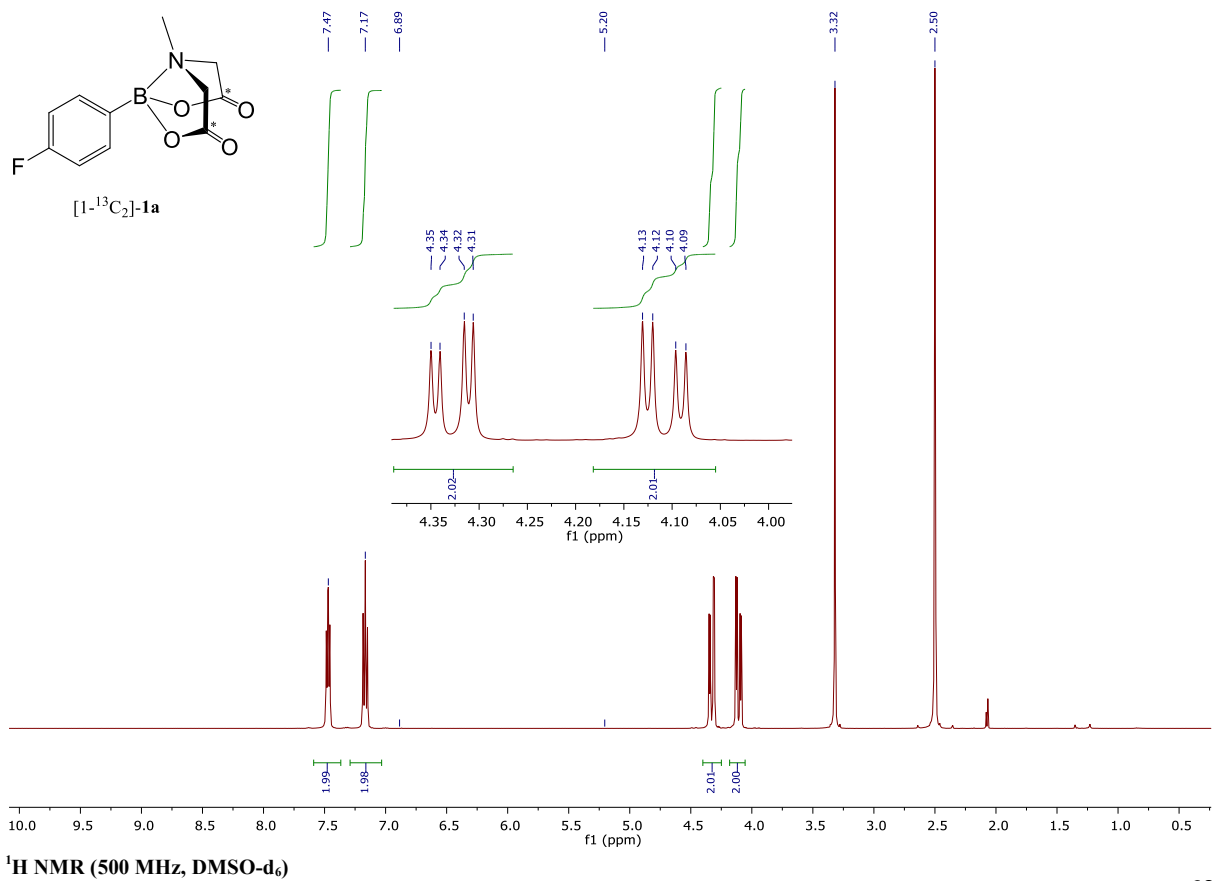

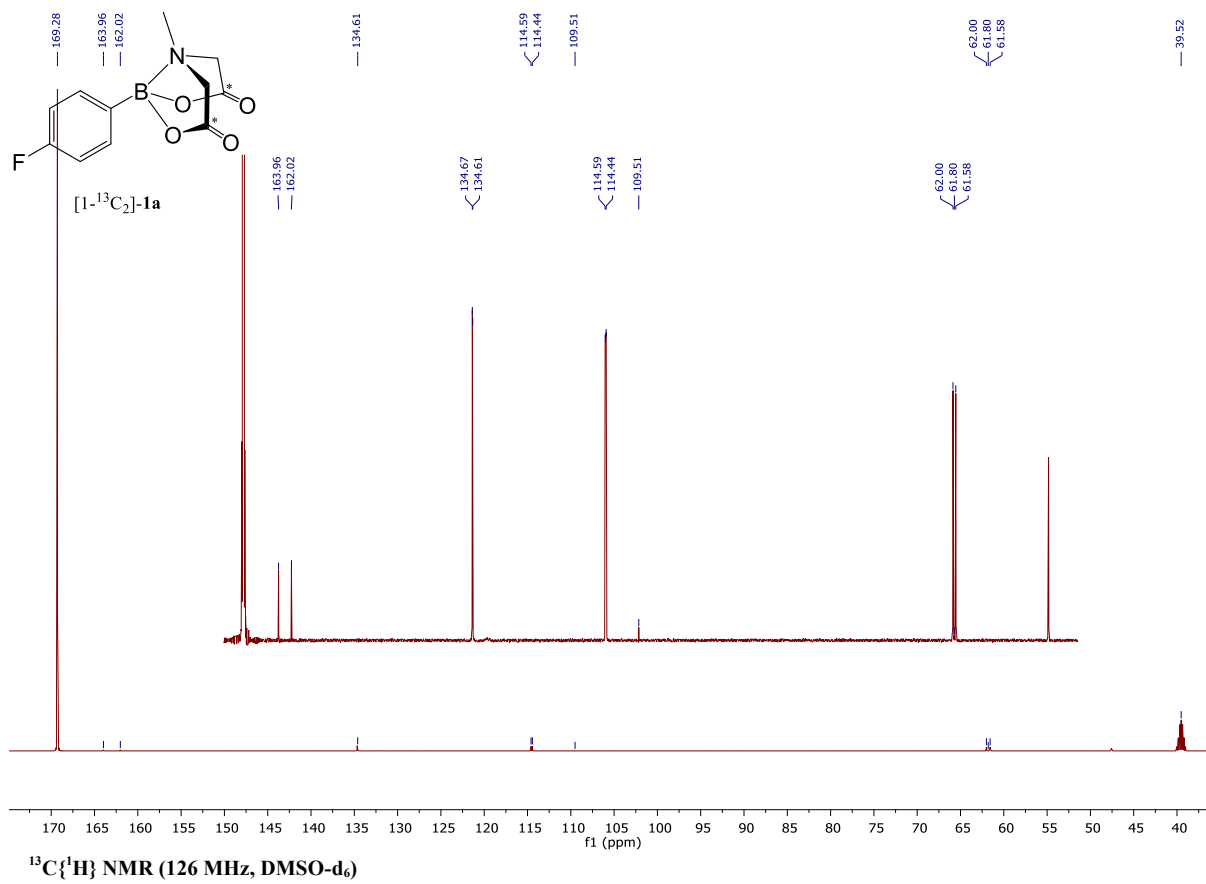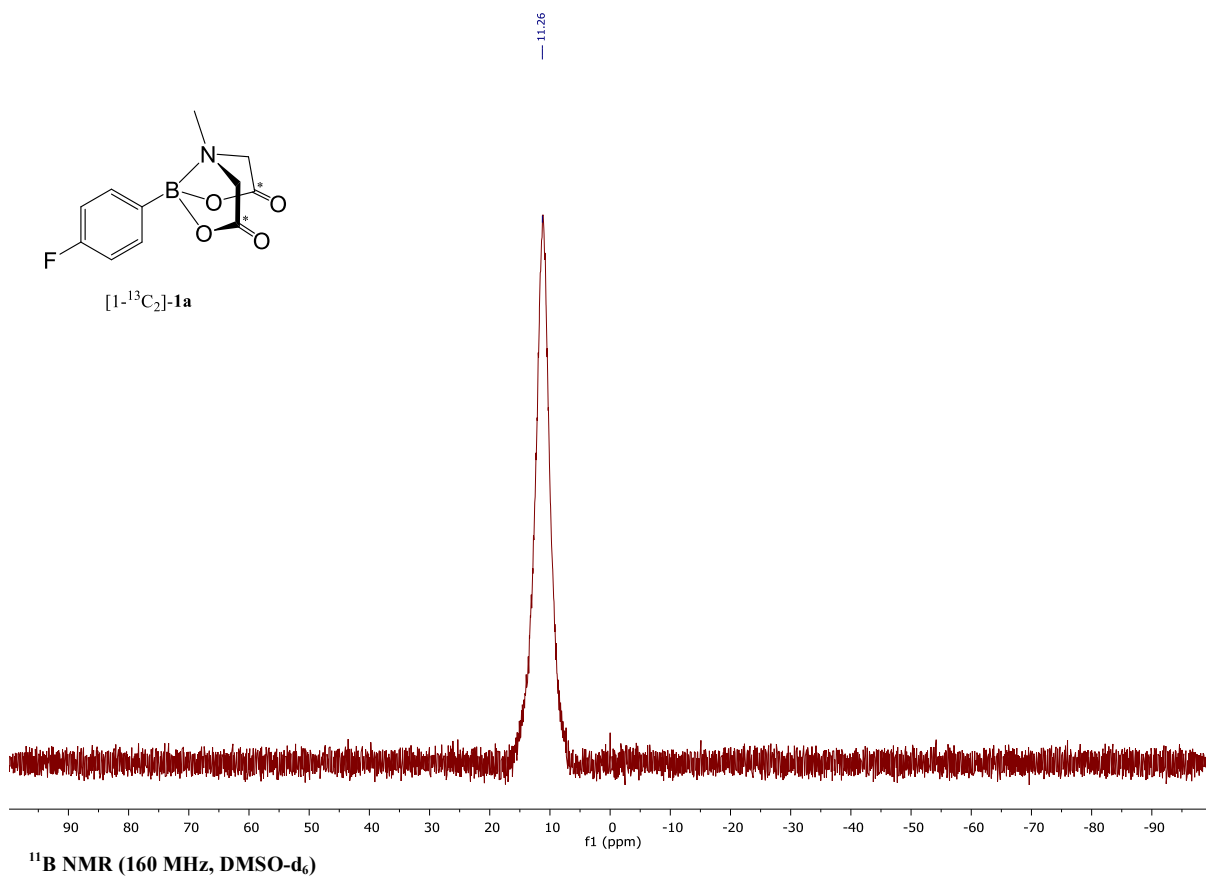



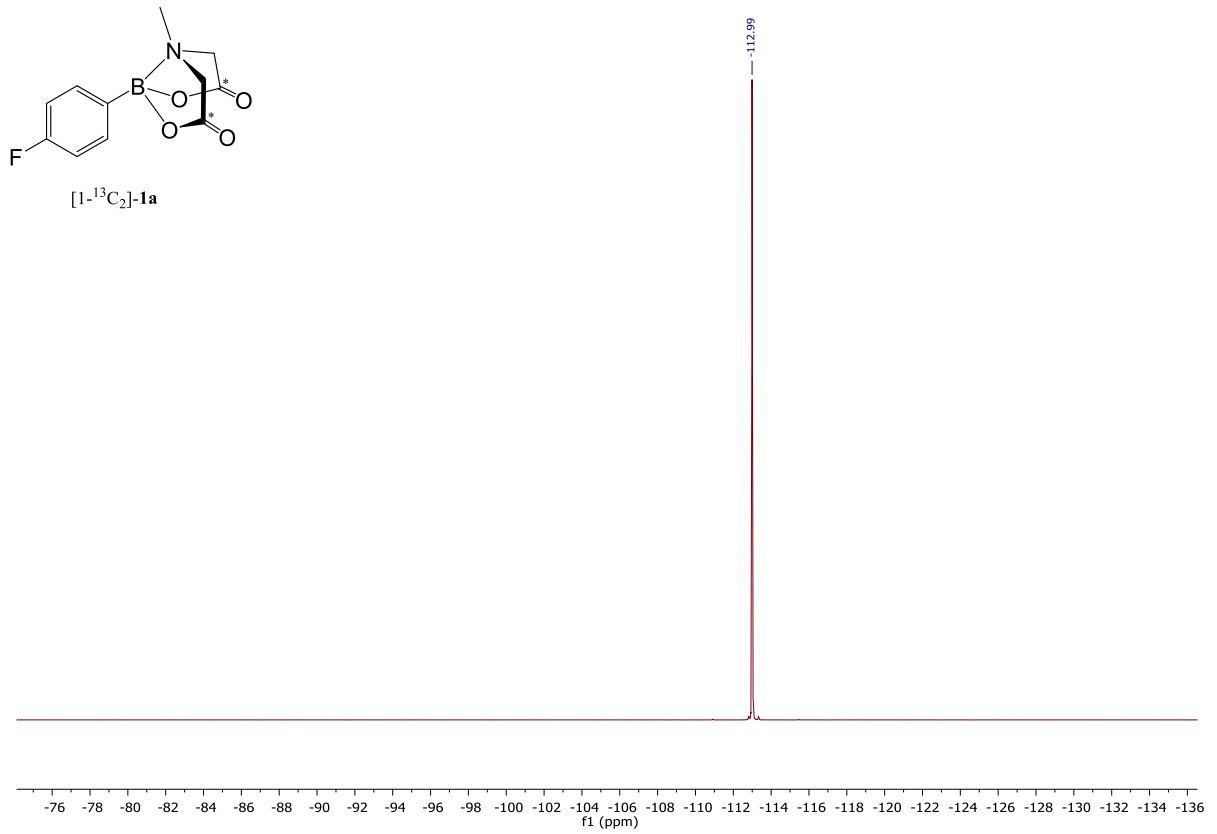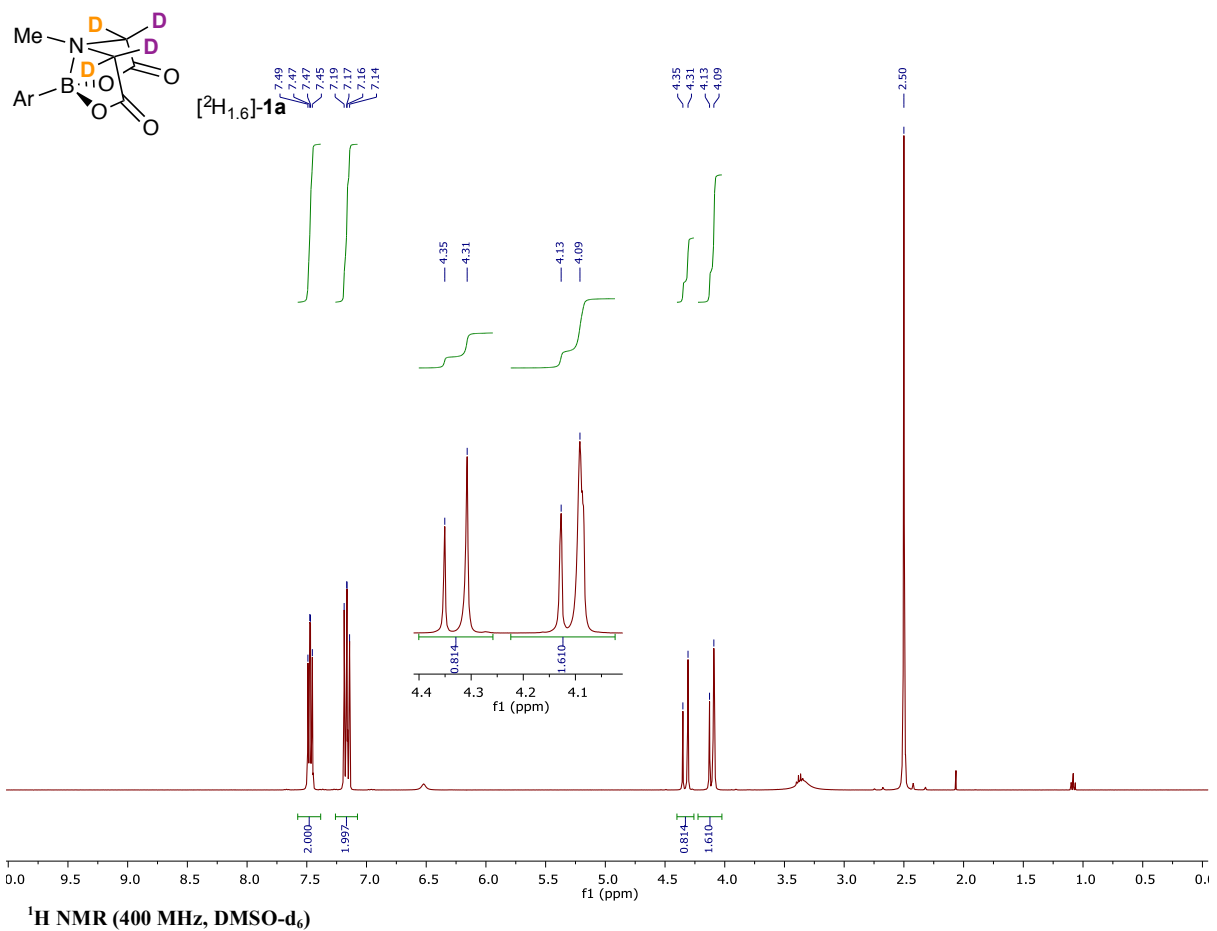

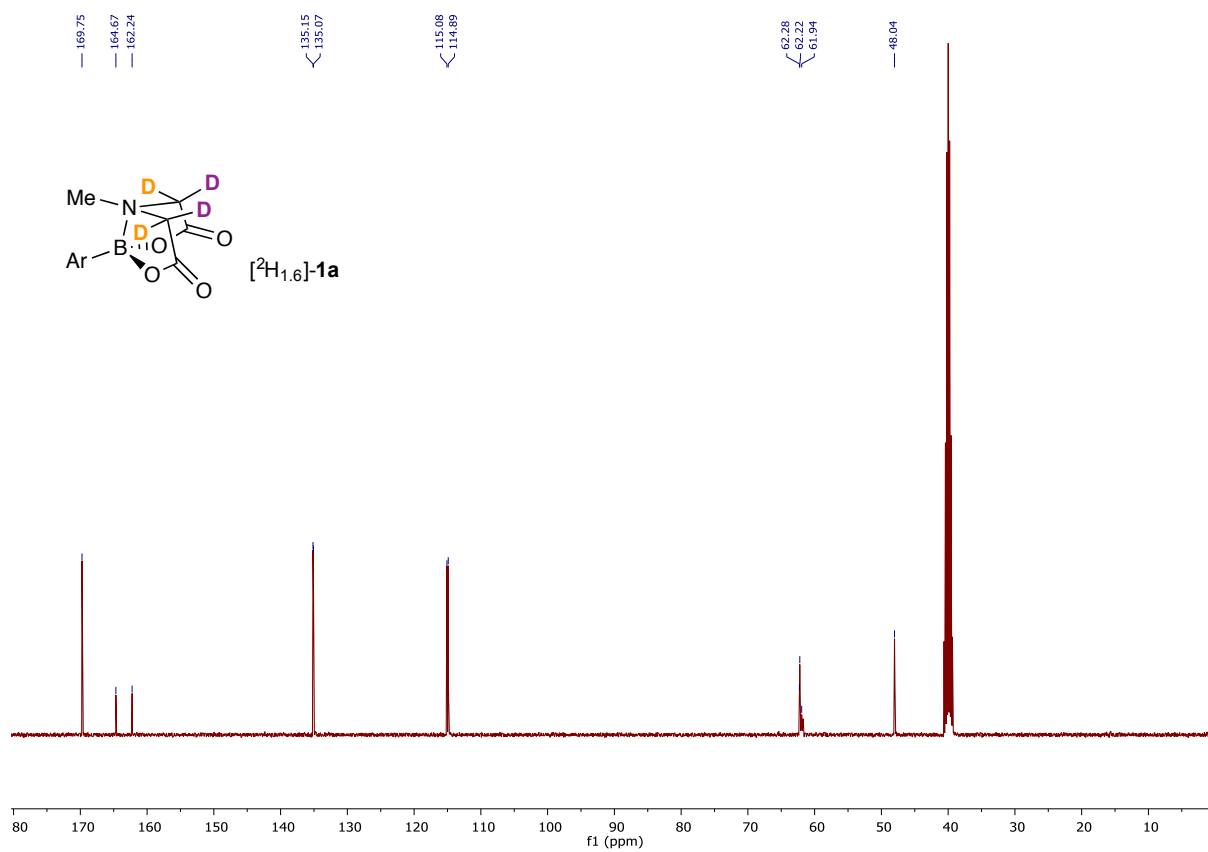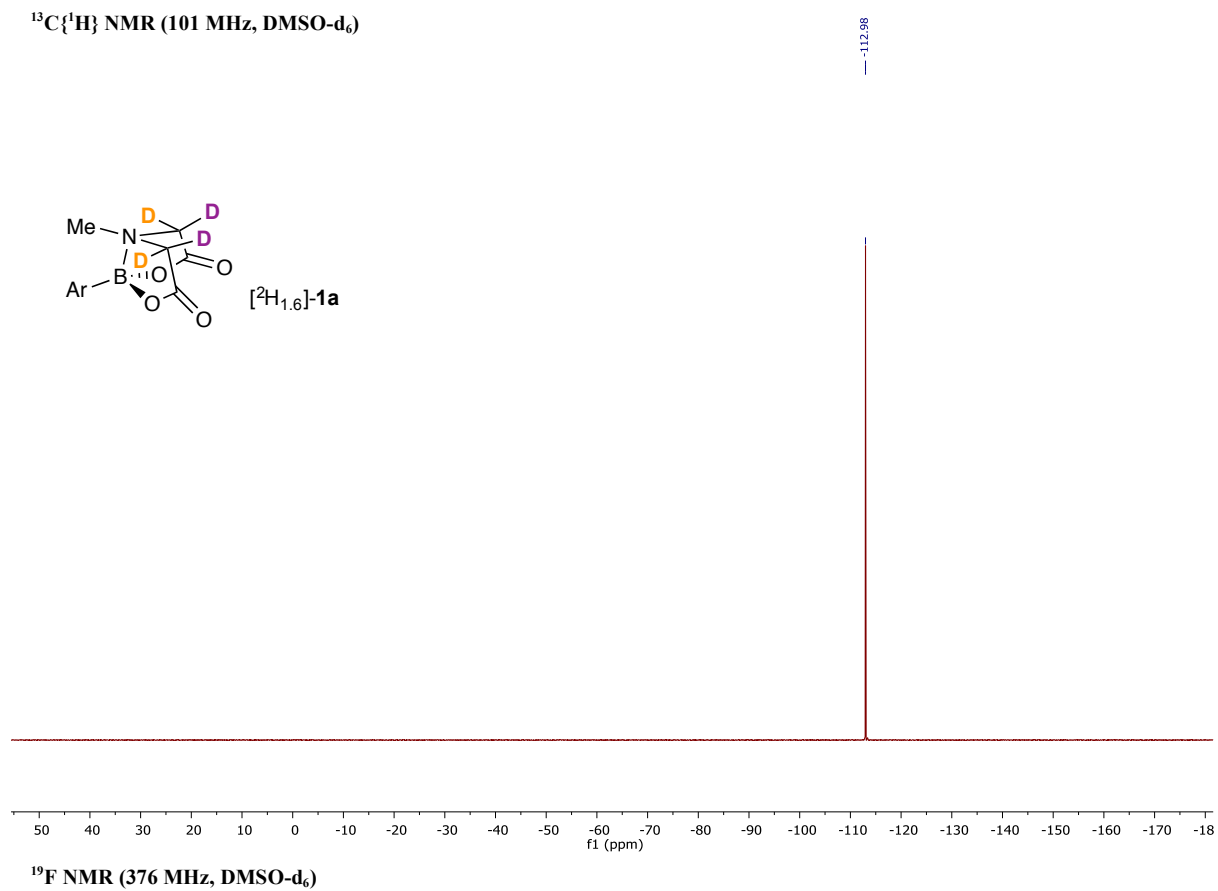

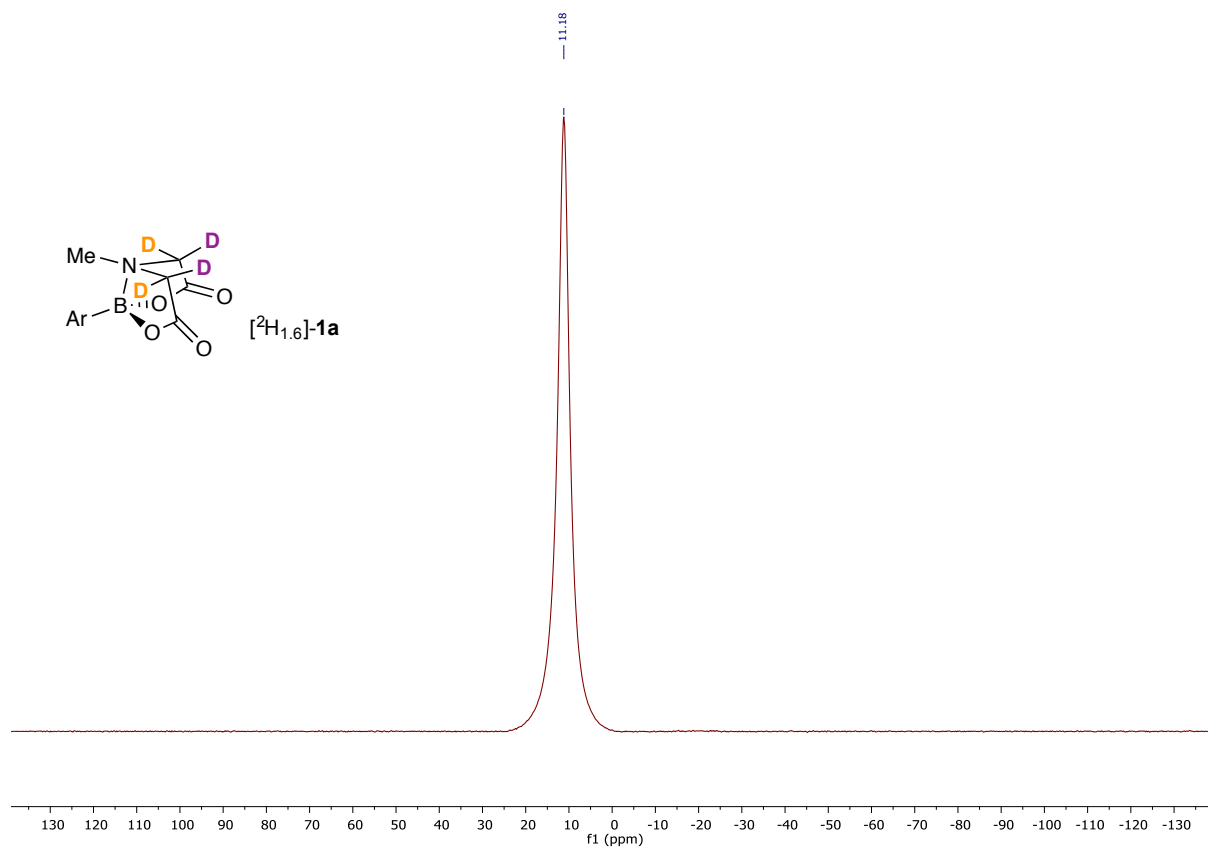

$^{11}\text{B}$  NMR (128 MHz,  $\text{DMSO-d}_6$ )

## VII. Computational Studies

### 1. Full Authorship of Gaussian 09

Gaussian 09 - Gaussian 09, Revision A.1, Frisch, M. J.; Trucks, G. W.; Schlegel, H. B.; Scuseria, G. E.; Robb, M. A.; Cheeseman, J. R.; Scalmani, G.; Barone, V.; Mennucci, B.; Petersson, G. A.; Nakatsuji, H.; Caricato, M.; Li, X.; Hratchian, H. P.; Izmaylov, A. F.; Bloino, J.; Zheng, G.; Sonnenberg, J. L.; Hada, M.; Ehara, M.; Toyota, K.; Fukuda, R.; Hasegawa, J.; Ishida, M.; Nakajima, T.; Honda, Y.; Kitao, O.; Nakai, H.; Vreven, T.; Montgomery, Jr., J. A.; Peralta, J. E.; Ogliaro, F.; Bearpark, M.; Heyd, J. J.; Brothers, E.; Kudin, K. N.; Staroverov, V. N.;

Kobayashi, R.; Normand, J.; Raghavachari, K.; Rendell, A.; Burant, J. C.; Iyengar, S. S.; Tomasi, J.; Cossi, M.; Rega, N.; Millam, N. J.; Klene, M.; Knox, J. E.; Cross, J. B.; Bakken, V.; Adamo, C.; Jaramillo, J.; Gomperts, R.; Stratmann, R. E.; Yazyev, O.; Austin, A. J.; Cammi, R.; Pomelli, C.; Ochterski, J. W.; Martin, R. L.; Morokuma, K.; Zakrzewski, V. G.; Voth, G. A.; Salvador, P.; Dannenberg, J. J.; Dapprich, S.; Daniels, A. D.; Farkas, Ö.; Foresman, J. B.; Ortiz, J. V.; Cioslowski, J.; Fox, D. J. Gaussian, Inc., Wallingford CT, **2009**

2. B-N Cleavage of MIDA Boronate **1a**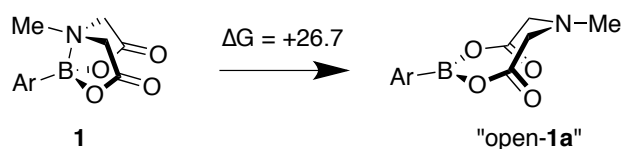

**Figure 33.** B-N cleavage of **1a** results in an open intermediate "open" **1a** disfavored by 26.7 kcal/mol.

## Geometries, Energies, and Thermal Corrections

|                                                                                                                                                                                                                                                                                                                                                                                                                                                                                                                                                                                                                                                                                                                                                                                                                                    |                                                                                                                                                                                                                                                                                                                                                                                                                                                                                                                                                                                                                                                                                                                                                                                                                                                                                                                                                                                                                                                                                                                                                                                        |
|------------------------------------------------------------------------------------------------------------------------------------------------------------------------------------------------------------------------------------------------------------------------------------------------------------------------------------------------------------------------------------------------------------------------------------------------------------------------------------------------------------------------------------------------------------------------------------------------------------------------------------------------------------------------------------------------------------------------------------------------------------------------------------------------------------------------------------|----------------------------------------------------------------------------------------------------------------------------------------------------------------------------------------------------------------------------------------------------------------------------------------------------------------------------------------------------------------------------------------------------------------------------------------------------------------------------------------------------------------------------------------------------------------------------------------------------------------------------------------------------------------------------------------------------------------------------------------------------------------------------------------------------------------------------------------------------------------------------------------------------------------------------------------------------------------------------------------------------------------------------------------------------------------------------------------------------------------------------------------------------------------------------------------|
| <pre> <b>1a</b> ----- Using Gaussian 09: AM64L-G09RevD.01 24- Apr-2013 ===== ===== ==== # opt=maxcycle=250 freq=noraman 6-31g(d) scrf=(solvent=thf,pcm) geom=connectivity density=current m062x scf=(maxcycle=300,direct,tight) #N Geom=AllCheck Guess=TCheck SCRF=Check GenChk RM062X/6-31G(d) Freq ----- Pointgroup= C1  Stoichiometry= C11H11BFNO4 C1[X(C11H11BFNO4)] #Atoms= 29 Charge = 0      Multiplicity = 1 ----- SCF Energy= -905.937028796      Predicted Change= -4.446002D-09 ===== ===== ==== Optimization completed.      {Found  2 times} Item  Max Val.  Criteria  Pass?  RMS Val. Criteria  Pass? Force  0.00000    0.00045 [YES]  0.00000    0.00030 [YES] Displ  0.00040    0.00180 [YES]  0.00040    0.00180 [YES] ----- Atomic      Coordinates (Angstroms) Type        X          Y          Z ----- </pre> | <pre> N  -1.437453  0.027498  0.966851 C  -0.728690 -0.589285  2.113599 C  -2.696113 -0.705833  0.662403 C  -2.348568 -1.671120 -0.468692 O  -3.029703 -2.602646 -0.803643 O  -1.196597 -1.324203 -1.034361 B  -0.631582 -0.089951 -0.498799 C   0.947558 -0.099845 -0.362520 O  -1.179886  1.115880 -1.153321 C  -1.685972  2.013426 -0.317733 O  -2.097436  3.098811 -0.633108 C  -1.644096  1.484279  1.116014 C   1.652584 -1.302902 -0.218709 C   3.033071 -1.324979 -0.044648 C   3.709864 -0.114686 -0.014377 C   3.061277  1.101905 -0.158475 C   1.679865  1.094437 -0.335388 H   0.228133 -0.086118  2.250736 H  -0.549139 -1.642521  1.887115 H  -1.341894 -0.500098  3.012867 H  -3.459347 -0.010215  0.301703 H  -3.081915 -1.229160  1.538431 H  -2.548733  1.725229  1.676267 H  -0.777869  1.915398  1.627120 H   1.111764 -2.245527 -0.254181 H   3.586293 -2.251941  0.061414 H   3.635719  2.021730 -0.140008 H   1.170124  2.045804 -0.471890 F   5.043471 -0.122269  0.155899 ----- Statistical Thermodynamic Analysis Temperature= 298.150 Kelvin  Pressure= 1.00000 Atm ===== ===== ==== SCF Energy= -905.937028796      Predicted Change= -4.446002D-09 </pre> |
|------------------------------------------------------------------------------------------------------------------------------------------------------------------------------------------------------------------------------------------------------------------------------------------------------------------------------------------------------------------------------------------------------------------------------------------------------------------------------------------------------------------------------------------------------------------------------------------------------------------------------------------------------------------------------------------------------------------------------------------------------------------------------------------------------------------------------------|----------------------------------------------------------------------------------------------------------------------------------------------------------------------------------------------------------------------------------------------------------------------------------------------------------------------------------------------------------------------------------------------------------------------------------------------------------------------------------------------------------------------------------------------------------------------------------------------------------------------------------------------------------------------------------------------------------------------------------------------------------------------------------------------------------------------------------------------------------------------------------------------------------------------------------------------------------------------------------------------------------------------------------------------------------------------------------------------------------------------------------------------------------------------------------------|

Zero-point correction (ZPE)= -905.7142  
0.22276

Internal Energy (U)= -905.6996  
0.23740

Enthalpy (H)= -905.6986  
0.23834

Gibbs Free Energy (G)= -905.7565  
0.18043

-----  
Frequencies -- 48.9865 52.9343  
60.5363

### “open” 1a

-----  
Using Gaussian 09: AM64L-G09RevD.01 24-  
Apr-2013

=====  
# opt=maxcycle=250 freq=norman 6-31g(d)  
scrf=(solvent=thf,pcm)  
geom=connectivity density=current m062x  
scf=(maxcycle=300,direct,tight)  
#N Geom=AllCheck Guess=TCheck  
SCRF=Check GenChk RM062X/6-31G(d) Freq

-----  
Pointgroup= C1 Stoichiometry= C11H11BFNO4  
C1[X(C11H11BFNO4)] #Atoms= 29  
Charge = 0 Multiplicity = 1

-----  
SCF Energy= -905.890547477 Predicted  
Change= -1.263980D-08

=====  
Optimization completed. {Found 2  
times}  
Item Max Val. Criteria Pass? RMS Val.  
Criteria Pass?  
Force 0.00000 || 0.00045 [ YES ] 0.00000  
|| 0.00030 [ YES ]  
Displ 0.00160 || 0.00180 [ YES ] 0.00160 ||  
0.00180 [ YES ]

-----  
Atomic Coordinates (Angstroms)  
Type X Y Z

-----  
N 3.527223 0.194494 0.070837  
C 4.505470 -0.608874 -0.656473  
C 2.672784 0.929227 -0.856613  
C 1.731008 1.816437 -0.059767  
O 2.021650 2.909707 0.331705  
O 0.494739 1.318819 0.218334  
B -0.083132 0.069552 0.091189  
C -1.630682 0.010136 0.031613  
O 0.592105 -1.132470 0.011818  
C 1.838550 -1.568599 0.350316  
O 2.170792 -2.674684 0.024936  
C 2.765540 -0.582677 1.045743  
C -2.399596 1.183825 0.068837  
C -3.786987 1.138224 0.010479  
C -4.397958 -0.104545 -0.086258  
C -3.680550 -1.292341 -0.125131  
C -2.294344 -1.222683 -0.065562  
H 5.153015 -1.117918 0.061495  
H 5.119002 0.056645 -1.268963  
H 4.045121 -1.365054 -1.311427  
H 2.106145 0.275458 -1.542186  
H 3.303391 1.586538 -1.459012  
H 3.464522 -1.159893 1.653041  
H 2.208170 0.087909 1.706677  
H -1.901723 2.145931 0.146985  
H -4.396577 2.034524 0.036961  
H -4.209446 -2.235831 -0.201720  
H -1.713171 -2.139581 -0.097082  
F -5.736340 -0.159744 -0.146001

-----  
Statistical Thermodynamic Analysis  
Temperature= 298.150 Kelvin Pressure=  
1.00000 Atm

=====  
SCF Energy= -905.890547477 Predicted  
Change= -1.263980D-08  
Zero-point correction (ZPE)= -905.6691  
0.22140  
Internal Energy (U)= -905.6535  
0.23695  
Enthalpy (H)= -905.6526  
0.23790  
Gibbs Free Energy (G)= -905.7141  
0.17643

-----  
Frequencies -- 14.2117 45.1276  
53.7393

## 3. NaOH Mediated Hydrolysis C-Attack First Pathway

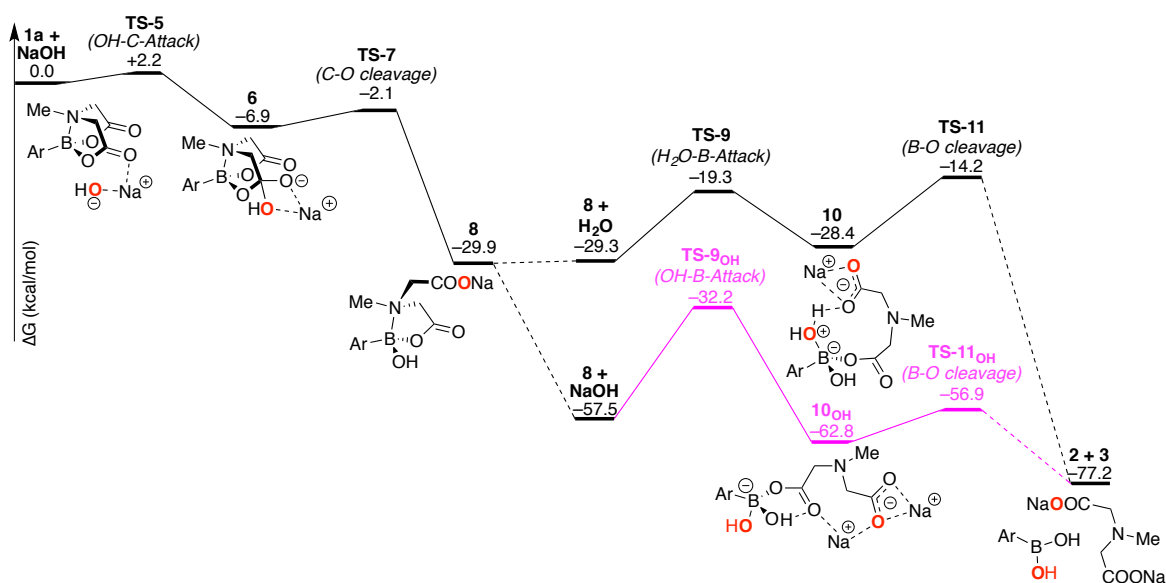

**Figure 34.** Minimum energy pathway for the NaOH-mediated hydrolysis of MIDA boronate **1a**.

## Geometries, Energies, and Thermal Corrections

**1a + NaOH**

Using Gaussian 09: AM64L-G09RevD.01 24-Apr-2013

```
#M062X/6-31G(d)
scf=(maxcycle=300,direct,tight) density=current
SCRF=(PCM,SOLVENT=THF)
opt=(maxcycle=250) freq=noraman
#N Geom=AllCheck Guess=TCheck
SCRF=Check GenChk RM062X/6-31G(d) Freq
```

```
Pointgroup= C1 Stoichiometry=
C11H12BFNNaO5 C1[X(C11H12BFNNaO5)]
#Atoms= 32
Charge = 0 Multiplicity = 1
```

```
SCF Energy= -1144.05117475 Predicted
Change= -1.124972D-07
```

```
Optimization completed. {Found 2
times}
```

| Item  | Max Val. | Criteria | Pass?   | RMS Val. |
|-------|----------|----------|---------|----------|
| Force | 0.00010  | 0.00045  | [ YES ] | 0.00001  |
| Displ | 0.00161  | 0.00180  | [ YES ] | 0.00161  |

| Atomic Type | Coordinates (Angstroms) |           |           |
|-------------|-------------------------|-----------|-----------|
|             | X                       | Y         | Z         |
| N           | -1.100609               | 0.831855  | 0.965589  |
| C           | -0.494270               | 0.138491  | 2.138925  |
| C           | -2.439703               | 0.247571  | 0.662281  |
| C           | -2.276398               | -0.562370 | -0.609481 |
| O           | -3.137679               | -1.291913 | -1.060817 |
| O           | -1.128109               | -0.321267 | -1.196579 |
| B           | -0.284999               | 0.650263  | -0.490292 |
| C           | 1.224058                | 0.187901  | -0.351645 |
| O           | -0.464843               | 1.998307  | -1.065517 |
| C           | -0.940798               | 2.907203  | -0.229215 |
| O           | -1.153159               | 4.059983  | -0.506446 |
| C           | -1.134506               | 2.300780  | 1.155152  |
| C           | 1.515994                | -1.153456 | -0.054961 |

|    |           |           |           |
|----|-----------|-----------|-----------|
| C  | 2.828725  | -1.590243 | 0.091423  |
| C  | 3.853177  | -0.666692 | -0.066536 |
| C  | 3.613879  | 0.665404  | -0.361173 |
| C  | 2.290179  | 1.080724  | -0.501486 |
| H  | 0.547012  | 0.448930  | 2.226930  |
| H  | -0.592579 | -0.936741 | 1.946447  |
| H  | -1.052359 | 0.427928  | 3.033692  |
| H  | -3.175941 | 1.038179  | 0.494134  |
| H  | -2.767693 | -0.409094 | 1.467322  |
| H  | -2.055045 | 2.639033  | 1.633007  |
| H  | -0.284348 | 2.595025  | 1.777561  |
| H  | 0.685964  | -1.846844 | 0.088428  |
| H  | 3.072164  | -2.621875 | 0.324538  |
| H  | 4.448860  | 1.347871  | -0.478863 |
| H  | 2.088568  | 2.121414  | -0.743709 |
| O  | -1.368096 | -2.513185 | 0.955434  |
| Na | -2.503413 | -3.448547 | -0.574659 |
| H  | -0.616724 | -2.999398 | 1.323419  |
| F  | 5.126888  | -1.081333 | 0.074708  |

-----

Statistical Thermodynamic Analysis  
 Temperature= 298.150 Kelvin Pressure=  
 1.000000 Atm

=====

SCF Energy= -1144.05117475 Predicted  
 Change= -1.124972D-07  
 Zero-point correction (ZPE)= -1143.8143  
 0.23680  
 Internal Energy (U)= -1143.7958  
 0.25532  
 Enthalpy (H)= -1143.7949  
 0.25626  
 Gibbs Free Energy (G)= -1143.8610  
 0.19012

-----

Frequencies -- 46.0313 52.0689  
 62.4743

## TS-5

-----

Using Gaussian 09: AM64L-G09RevD.01 24-  
 Apr-2013

=====

#M062X/6-31G(d)  
 scf=(maxcycle=300,direct,tight) density=current  
 SCRF=(PCM,SOLVENT=THF)  
 opt=(maxcycle=250,ts,calcfc,noeigentest)  
 freq=noraman  
 #N Geom=AllCheck Guess=TCheck  
 SCRF=Check GenChk RM062X/6-31G(d) Freq

-----

Pointgroup= C1 Stoichiometry=  
 C11H12BFNNaO5 C1[X(C11H12BFNNaO5)]  
 #Atoms= 32  
 Charge = 0 Multiplicity = 1

-----

SCF Energy= -1144.04647939 Predicted  
 Change= -2.087281D-09

=====

Optimization completed. {Found 2  
 times}

| Item     | Max Val. | Criteria | Pass?   | RMS Val. |
|----------|----------|----------|---------|----------|
| Criteria | Pass?    |          |         |          |
| Force    | 0.00001  | 0.00045  | [ YES ] | 0.00000  |
|          | 0.00030  | [ YES ]  |         |          |
| Displ    | 0.00148  | 0.00180  | [ YES ] | 0.00148  |
| 0.00180  | [ YES ]  |          |         |          |

-----

| Atomic<br>Type | Coordinates (Angstroms) |           |           |
|----------------|-------------------------|-----------|-----------|
|                | X                       | Y         | Z         |
| N              | -0.967497               | 0.898918  | 0.946093  |
| C              | -0.420639               | 0.221099  | 2.154524  |
| C              | -2.370577               | 0.470048  | 0.670888  |
| C              | -2.302675               | -0.515526 | -0.486184 |
| O              | -3.297799               | -1.022367 | -0.990304 |
| O              | -1.140274               | -0.399362 | -1.131441 |
| B              | -0.222453               | 0.539455  | -0.513374 |
| C              | 1.271448                | 0.015412  | -0.374690 |
| O              | -0.310796               | 1.871316  | -1.171059 |
| C              | -0.653837               | 2.870193  | -0.378067 |
| O              | -0.767859               | 4.021359  | -0.717936 |
| C              | -0.837372               | 2.370061  | 1.049630  |
| C              | 1.577312                | -1.346421 | -0.483247 |
| C              | 2.876933                | -1.822208 | -0.325756 |
| C              | 3.880926                | -0.907223 | -0.050491 |
| C              | 3.634484                | 0.453363  | 0.057309  |
| C              | 2.327269                | 0.899808  | -0.113537 |
| H              | 0.651111                | 0.415813  | 2.206624  |
| H              | -0.638799               | -0.843905 | 2.046262  |
| H              | -0.920131               | 0.631902  | 3.036572  |
| H              | -2.953575               | 1.336522  | 0.342007  |
| H              | -2.829836               | 0.024972  | 1.551144  |
| H              | -1.693927               | 2.829935  | 1.544998  |
| H              | 0.067185                | 2.607108  | 1.618172  |
| H              | 0.781795                | -2.048611 | -0.719427 |
| H              | 3.120958                | -2.875340 | -0.416164 |
| H              | 4.455285                | 1.132971  | 0.260168  |
| H              | 2.134474                | 1.969371  | -0.051635 |
| O              | -1.687043               | -2.140344 | 0.872560  |
| Na             | -3.273765               | -3.135002 | -0.201598 |
| H              | -0.817731               | -2.414298 | 0.546919  |
| F              | 5.141099                | -1.351952 | 0.108814  |

-----

Statistical Thermodynamic Analysis  
 Temperature= 298.150 Kelvin Pressure=  
 1.000000 Atm

=====

SCF Energy= -1144.04647939 Predicted  
 Change= -2.087281D-09  
 Zero-point correction (ZPE)= -1143.8108  
 0.23562  
 Internal Energy (U)= -1143.7929  
 0.25348  
 Enthalpy (H)= -1143.7920  
 0.25443  
 Gibbs Free Energy (G)= -1143.8575  
 0.18892

-----



Frequencies -- -236.2815 24.5821  
39.3362

**6**

Using Gaussian 09: AM64L-G09RevD.01 24-Apr-2013

```
=====
#M062X/6-31G(d)
scf=(maxcycle=300,direct,tight) density=current
SCRFF=(PCM,SOLVENT=THF)
opt=(maxcycle=250) freq=noraman
#N Geom=AllCheck Guess=TCheck
SCRFF=Check GenChk RM062X/6-31G(d) Freq
=====
```

```
Pointgroup= C1 Stoichiometry=
C11H12BFNNaO5 C1[X(C11H12BFNNaO5)]
#Atoms= 32
Charge = 0 Multiplicity = 1
=====
```

SCF Energy= -1144.06344097 Predicted  
Change= -2.721340D-08

Optimization completed. {Found 2  
times}

| Item  | Max Val. | Criteria | Pass?   | RMS Val. |
|-------|----------|----------|---------|----------|
| Force | 0.00005  | 0.00045  | [ YES ] | 0.00000  |
|       | 0.00030  | [ YES ]  |         |          |
| Displ | 0.00123  | 0.00180  | [ YES ] | 0.00123  |
|       | 0.00180  | [ YES ]  |         |          |

| Atomic Type | Coordinates (Angstroms) |           |           |
|-------------|-------------------------|-----------|-----------|
|             | X                       | Y         | Z         |
| N           | -0.780572               | 0.830996  | 1.011949  |
| C           | -0.322449               | 0.043049  | 2.177287  |
| C           | -2.232276               | 0.623597  | 0.736880  |
| C           | -2.350329               | -0.553916 | -0.261999 |
| O           | -3.411444               | -0.534590 | -0.995522 |
| O           | -1.093900               | -0.564203 | -0.959492 |
| B           | -0.147845               | 0.375866  | -0.477325 |
| C           | 1.362529                | -0.141466 | -0.372130 |
| O           | -0.221978               | 1.723819  | -1.149510 |
| C           | -0.327245               | 2.744723  | -0.325490 |
| O           | -0.318457               | 3.910019  | -0.646556 |
| C           | -0.431114               | 2.259032  | 1.119546  |
| C           | 1.635201                | -1.501985 | -0.176523 |
| C           | 2.933255                | -1.983435 | -0.030106 |
| C           | 3.977990                | -1.073282 | -0.082627 |
| C           | 3.768229                | 0.282218  | -0.279695 |
| C           | 2.457253                | 0.732353  | -0.424775 |
| H           | 0.762975                | 0.118008  | 2.252137  |
| H           | -0.618567               | -0.994965 | 2.026700  |
| H           | -0.790720               | 0.433852  | 3.085033  |
| H           | -2.619295               | 1.513927  | 0.237212  |
| H           | -2.781970               | 0.451289  | 1.665294  |
| H           | -1.164409               | 2.827992  | 1.694926  |
| H           | 0.550927                | 2.354929  | 1.594435  |

|    |           |           |           |
|----|-----------|-----------|-----------|
| H  | 0.807709  | -2.206823 | -0.145010 |
| H  | 3.146885  | -3.036852 | 0.117292  |
| H  | 4.618021  | 0.955238  | -0.323480 |
| H  | 2.291878  | 1.793476  | -0.599422 |
| O  | -2.286131 | -1.801349 | 0.566185  |
| Na | -4.339150 | -2.392711 | -0.360443 |
| H  | -1.600724 | -2.337163 | 0.137121  |
| F  | 5.240019  | -1.522699 | 0.058066  |

Statistical Thermodynamic Analysis  
Temperature= 298.150 Kelvin Pressure=  
1.00000 Atm

```
=====
SCF Energy= -1144.06344097 Predicted
Change= -2.721340D-08
Zero-point correction (ZPE)= -1143.8254
0.23794
Internal Energy (U)= -1143.8078
0.25561
Enthalpy (H)= -1143.8068
0.25656
Gibbs Free Energy (G)= -1143.8719
0.19144
=====
```

Frequencies -- 30.7680 43.7501  
46.1134

**TS-7**

Using Gaussian 09: AM64L-G09RevD.01 24-Apr-2013

```
=====
#M062X/6-31G(d)
scf=(maxcycle=300,direct,tight) density=current
SCRFF=(PCM,SOLVENT=THF)
opt=(maxcycle=250,ts,calcfc,noeigentest)
freq=noraman
#N Geom=AllCheck Guess=TCheck
SCRFF=Check GenChk RM062X/6-31G(d) Freq
=====
```

```
Pointgroup= C1 Stoichiometry=
C11H12BFNNaO5 C1[X(C11H12BFNNaO5)]
#Atoms= 32
Charge = 0 Multiplicity = 1
=====
```

SCF Energy= -1144.05503951 Predicted  
Change= -1.068458D-08

Optimization completed. {Found 1  
times}

| Item  | Max Val. | Criteria | Pass?   | RMS Val. |
|-------|----------|----------|---------|----------|
| Force | 0.00004  | 0.00045  | [ YES ] | 0.00000  |
|       | 0.00030  | [ YES ]  |         |          |
| Displ | 0.00192  | 0.00180  | [ NO ]  | 0.00192  |
|       | 0.00180  | [ YES ]  |         |          |

| Atomic Type | Coordinates (Angstroms) |   |   |
|-------------|-------------------------|---|---|
|             | X                       | Y | Z |

```

-----
N      -0.890817   0.293245   1.191978
C      -0.238880  -0.558663   2.203271
C      -2.343724   0.054160   1.107468
C      -2.768537  -1.199407   0.356074
O      -3.702120  -1.192589  -0.437719
O      -1.054689  -0.913825  -1.054926
B      -0.299984   0.045796  -0.516639
C       1.305673  -0.095668  -0.409515
O      -0.676552   1.505982  -0.930409
C      -0.776191   2.382980   0.035165
O      -0.950024   3.575977  -0.109128
C      -0.640685   1.725509   1.410583
C       1.855637  -1.384104  -0.329145
C       3.225085  -1.602092  -0.204699
C       4.063280  -0.497126  -0.168692
C       3.580065   0.797674  -0.258562
C       2.201889   0.981464  -0.378115
H       0.822440  -0.309625   2.233019
H      -0.354660  -1.602523   1.913258
H      -0.687730  -0.393677   3.188926
H      -2.805421   0.890810   0.580529
H      -2.771564   0.005532   2.117771
H      -1.320973   2.179027   2.137700
H       0.387518   1.856123   1.762072
H       1.180141  -2.235893  -0.370022
H       3.650184  -2.598575  -0.139143
H       4.274124   1.631607  -0.239243
H       1.827679   2.000090  -0.464670
O      -2.329245  -2.329727   0.923324
Na     -2.669925  -0.291273  -2.343713
H      -2.713338  -3.070511   0.421302
F       5.392866  -0.691664  -0.048160
-----

```

```

-----
Statistical Thermodynamic Analysis
Temperature= 298.150 Kelvin   Pressure=
1.00000 Atm
=====
SCF Energy= -1144.05503951   Predicted
Change= -1.068458D-08
Zero-point correction (ZPE)= -1143.8182
0.23680
Internal Energy (U)= -1143.8003
0.25467
Enthalpy (H)= -1143.7994
0.25561
Gibbs Free Energy (G)= -1143.8644
0.19062
-----

```

```

Frequencies -- -130.4213      32.4692
53.3280

```

**8**

Using Gaussian 09: AM64L-G09RevD.01 24-Apr-2013

```

=====
#M062X/6-31G(d) scf=(maxcycle=300,direct,tight)
density=current

SCRF=(PCM,SOLVENT=THF) opt=(maxcycle=250)
freq=noraman

#N  Genom=AllCheck Guess=TCheck SCRF=Check
GenChk RM062X/6-31G(d) Freq
-----
Pointgroup= C1  Stoichiometry= C11H12BFNNaO5
C1[X(C11H12BFNNaO5)] #Atoms= 32

Charge = 0   Multiplicity = 1
-----
SCF Energy= -1144.10162423   Predicted Change= -
1.090056D-08
=====
Optimization completed.   {Found 2
times}

Item  Max Val.  Criteria  Pass?  RMS Val.
Criteria  Pass?

Force  0.00001 || 0.00045 [YES]  0.00000 ||
0.00030 [YES]

Displ  0.00057 || 0.00180 [YES]  0.00057 ||
0.00180 [YES]
-----
Atomic  Coordinates (Angstroms)
Type  X      Y      Z
-----
N      -0.709753  -0.896068  0.982654
C       0.209789  -1.794992  1.717098
C      -2.005127  -1.626761  0.779126
C      -3.013332  -0.778246  -0.023417
O      -3.606913   0.130423  0.598613
O      -0.392177  -1.308173  -1.541404

```

|    |           |           |           |
|----|-----------|-----------|-----------|
| B  | -0.078545 | -0.382100 | -0.546509 |
| C  | 1.493416  | -0.103969 | -0.400057 |
| O  | -0.878231 | 0.912132  | -0.602218 |
| C  | -1.194137 | 1.405028  | 0.584946  |
| O  | -1.665471 | 2.507360  | 0.750413  |
| C  | -0.908962 | 0.393814  | 1.685224  |
| C  | 2.407676  | -1.108963 | -0.748859 |
| C  | 3.782750  | -0.929671 | -0.630773 |
| C  | 4.247527  | 0.287555  | -0.154584 |
| C  | 3.391109  | 1.318803  | 0.193626  |
| C  | 2.018757  | 1.109327  | 0.063254  |
| H  | 1.138314  | -1.265017 | 1.927975  |
| H  | 0.425173  | -2.658053 | 1.083801  |
| H  | -0.256686 | -2.124326 | 2.649613  |
| H  | -2.420203 | -1.860709 | 1.763789  |
| H  | -1.765810 | -2.544717 | 0.241811  |
| H  | -1.734667 | 0.360615  | 2.397563  |
| H  | 0.016373  | 0.668258  | 2.199967  |
| H  | 2.028546  | -2.052999 | -1.131963 |
| H  | 4.491646  | -1.704910 | -0.902341 |
| H  | 3.798690  | 2.259065  | 0.549381  |
| H  | 1.353177  | 1.932596  | 0.316529  |
| O  | -3.095982 | -0.989465 | -1.264654 |
| Na | -3.272481 | 1.381717  | -1.381014 |
| H  | -1.362267 | -1.348116 | -1.675420 |
| F  | 5.575488  | 0.474737  | -0.032787 |

## Statistical Thermodynamic Analysis

Temperature= 298.150 Kelvin Pressure= 1.00000  
Atm

SCF Energy= -1144.10162423 Predicted Change= -  
1.090056D-08

Zero-point correction (ZPE)= -1143.8631 0.23849

Internal Energy (U)= -1143.8451 0.25647

Enthalpy (H)= -1143.8442 0.25741

Gibbs Free Energy (G)= -1143.9086 0.19297

-----  
-----  
Frequencies -- 48.0550 49.7249  
67.3570

**8 + H<sub>2</sub>O**

-----  
-----  
Using Gaussian 09: AM64L-G09RevD.01 24-  
Apr-2013

=====  
=====  
#M062X/6-31G(d)  
scf=(maxcycle=300,direct,tight) density=current  
SCRF=(PCM,SOLVENT=THF)  
opt=(maxcycle=250) freq=norman  
#N Geom=AllCheck Guess=TChech  
SCRF=Check GenChk RM062X/6-31G(d) Freq

-----  
-----  
Pointgroup= C1 Stoichiometry=  
C11H14BFNNaO6 C1[X(C11H14BFNNaO6)]  
#Atoms= 35  
Charge = 0 Multiplicity = 1

-----  
-----  
SCF Energy= -1220.49971357 Predicted  
Change= -2.156260D-08

=====  
=====  
Optimization completed. {Found 1  
times}  
Item Max Val. Criteria Pass? RMS Val.  
Criteria Pass?  
Force 0.00002 || 0.00045 [ YES ] 0.00000  
|| 0.00030 [ YES ]  
Displ 0.00207 || 0.00180 [ NO ] 0.00207 ||  
0.00180 [ YES ]

-----  
-----  
Atomic Coordinates (Angstroms)  
Type X Y Z

-----  
-----  
N -0.728651 1.053301 1.026673

```

C    0.300407    1.811224    1.791707
C   -1.210845   -0.064783    1.893706
C   -2.132232   -1.069461    1.174983
O   -3.180769   -0.603995    0.649980
O   -0.888537   -0.445919   -1.069784
B   -0.091052   0.596056   -0.493551
C    1.433546    0.156047   -0.354778
O   -0.282488    1.903682   -1.178076
C   -1.256102    2.642247   -0.664157
O   -1.667823    3.669710   -1.143086
C   -1.790496    2.007447    0.614324
C    1.767459   -1.081843    0.215432
C    3.091951   -1.483226    0.375004
C    4.093164   -0.624213   -0.052562
C    3.816476    0.607300   -0.624896
C    2.483102    0.986146   -0.766257
H    0.678975    2.626705    1.171809
H    1.124263    1.145063    2.044881
H   -0.153233    2.214753    2.700610
H   -1.734754    0.375244    2.749929
H   -0.324377   -0.590552    2.250964
H   -2.710370    1.451812    0.413022
H   -1.980429    2.760288    1.383071
H    0.977074   -1.747446    0.562414
H    3.356976   -2.435589    0.822210
H    4.634188    1.244431   -0.944903
H    2.253313    1.951456   -1.210421
O   -1.753217   -2.260349    1.162169
H   -1.829660   -0.210603   -1.122791
Na   -1.260924   -2.747618   -0.995713
O   -3.417783   -2.242719   -1.452609
H   -3.766729   -1.719713   -2.187241
F    5.377515   -0.998815    0.097169
H   -3.550541   -1.690690   -0.637979

```

```

-----
Statistical Thermodynamic Analysis
Temperature= 298.150 Kelvin   Pressure=
1.00000 Atm
=====
=====
=====

```

```

SCF Energy= -1220.49971357 Predicted
Change= -2.156260D-08
Zero-point correction (ZPE)= -1220.2358
0.26385
Internal Energy (U)= -1220.2153
0.28435
Enthalpy (H)= -1220.2144 0.28529
Gibbs Free Energy (G)= -1220.2843
0.21534
-----

```

```

Frequencies -- 35.3716      54.0300
58.2874

```

**8 + NaOH**

Using Gaussian 09: AM64L-G09RevD.01 24-Apr-2013

```

=====
#M062X/6-31G(d)
scf=(maxcycle=300,direct,tight) density=current
SCRFF=(PCM,SOLVENT=THF)
opt=(maxcycle=250) freq=norman
#N Geom=AllCheck Guess=TCheck
SCRFF=Check GenChk RM062X/6-31G(d) Freq
-----

```

```

Pointgroup= C1 Stoichiometry=
C11H13BFNNa2O6 C1[X(C11H13BFNNa2O6)]
#Atoms= 35
Charge = 0 Multiplicity = 1
-----

```

```

SCF Energy= -1382.24480054 Predicted
Change= -1.339447D-07
-----

```

```

Optimization completed. {Found 1
times}
Item Max Val. Criteria Pass? RMS Val.
Criteria Pass?
Force 0.00003 || 0.00045 [ YES ] 0.00000
|| 0.00030 [ YES ]
Displ 0.00413 || 0.00180 [ NO ] 0.00413 ||
0.00180 [ YES ]
-----

```

| Atomic Type | Coordinates (Angstroms) |           |           |
|-------------|-------------------------|-----------|-----------|
|             | X                       | Y         | Z         |
| N           | -0.298009               | -0.658596 | -1.406215 |
| C           | 0.768555                | -0.593754 | -2.436498 |
| C           | -1.508164               | -0.011849 | -1.995090 |
| C           | -2.727018               | 0.115804  | -1.066320 |
| O           | -2.944211               | -0.821311 | -0.260304 |
| O           | -0.547381               | 1.348635  | 0.198500  |
| B           | 0.139343                | 0.141762  | 0.100472  |
| C           | 1.746185                | 0.211736  | 0.184349  |
| O           | -0.391941               | -0.914397 | 1.044369  |
| C           | -0.798738               | -2.041000 | 0.496731  |
| O           | -1.299147               | -2.947425 | 1.128738  |
| C           | -0.538116               | -2.064218 | -0.995612 |
| C           | 2.410942                | 1.394537  | -0.165521 |
| C           | 3.799372                | 1.501640  | -0.131805 |
| C           | 4.532161                | 0.395162  | 0.269631  |
| C           | 3.928084                | -0.796529 | 0.637572  |
| C           | 2.536701                | -0.871820 | 0.591399  |
| H           | 1.668511                | -1.079057 | -2.060216 |
| H           | 0.993903                | 0.453517  | -2.645814 |
| H           | 0.428390                | -1.089172 | -3.350789 |
| H           | -1.799230               | -0.587630 | -2.883193 |
| H           | -1.211125               | 0.987648  | -2.309208 |
| H           | -1.380258               | -2.513980 | -1.522194 |
| H           | 0.363913                | -2.654142 | -1.186557 |
| H           | 1.819299                | 2.256059  | -0.465999 |
| H           | 4.316920                | 2.416434  | -0.401611 |
| H           | 4.541697                | -1.632903 | 0.955737  |
| H           | 2.061345                | -1.803349 | 0.894453  |
| O           | -3.426229               | 1.140722  | -1.242010 |
| H           | -1.190132               | 1.373748  | 1.053634  |

```

Na -2.624848 2.715987 0.110451
O -2.257768 1.549655 1.967556
H -1.889762 1.961565 2.760357
Na -2.665156 -0.608875 1.952073
F 5.876616 0.483233 0.309663

```

---

Statistical Thermodynamic Analysis

Temperature= 298.150 Kelvin Pressure=  
1.00000 Atm

```

=====
SCF Energy= -1382.24480054 Predicted
Change= -1.339447D-07
Zero-point correction (ZPE)= -1381.9941
0.25062
Internal Energy (U)= -1381.9724
0.27230
Enthalpy (H)= -1381.9715
0.27324
Gibbs Free Energy (G)= -1382.0442
0.20052

```

```

-----
Frequencies -- 36.9155 46.6536
57.2145

```

### TS-9

-----  
Using Gaussian 09: AM64L-G09RevD.01 24-  
Apr-2013

```

=====
=====
=====#M062X/6-31G(d)
scf=(maxcycle=300,direct,tight) density=current
SCRFF=(PCM,SOLVENT=THF)
opt=(maxcycle=250,ts,calcfc, noeigentest,gdiis)
iop(1/8=18) freq=noraman
#N Geom=AllCheck Guess=TCheck
SCRFF=Check Test GenChk RM062X/6-31G(d)
Freq

```

```

-----
Pointgroup= C1 Stoichiometry=
C11H14BFNNaO6 C1[X(C11H14BFNNaO6)]
#Atoms= 35
Charge = 0 Multiplicity = 1

```

```

-----
SCF Energy= -1220.48215501 Predicted
Change= -8.027524D-10

```

```

=====
=====
=====#Optimization completed on the basis of negligible
forces. {Found 2 times}
Item Max Val. Criteria Pass? RMS Val.
Criteria Pass?
Force 0.00000 || 0.00045 [YES] 0.00000
|| 0.00030 [YES]

```

```

Displ 0.00293 || 0.00180 [NO] 0.00293 ||
0.00180 [YES]

```

```

-----
Atomic Coordinates (Angstroms)
Type X Y Z

```

```

-----
N -3.633190 -1.022567 -0.522453
C -4.618574 -1.969089 -1.029304
C -3.665789 -1.021333 0.946446
C -2.628871 -0.037825 1.503401
O -1.455499 -0.504244 1.618598
O 0.795026 1.760408 -1.678394
B 0.895134 0.610238 -0.948075
C 2.306013 0.109994 -0.484863
O -0.120990 -0.405673 -1.012513
C -1.408843 -0.100836 -1.060008
O -1.821211 1.046314 -1.150326
C -2.312199 -1.319505 -1.046141
C 3.464324 0.815638 -0.833524
C 4.725127 0.392552 -0.421441
C 4.809715 -0.753878 0.354000
C 3.691298 -1.484915 0.728732
C 2.443407 -1.042560 0.300871
H -4.646789 -1.923929 -2.121479
H -5.606558 -1.697600 -0.647702
H -4.405410 -3.008863 -0.724949
H -3.450629 -2.027976 1.345424
H -4.667437 -0.716567 1.258936
H -1.793722 -2.127460 -0.508529
H -2.409199 -1.628950 -2.094662
H 3.377751 1.710606 -1.443911
H 5.630167 0.927669 -0.687932
H 3.811693 -2.374419 1.337873
H 1.554661 -1.601634 0.583738
O -2.975317 1.143366 1.725891
Na -1.699863 2.603534 0.614580
H -0.129787 1.917947 -1.925928
F 6.022157 -1.173326 0.758901
H -0.380908 0.582923 1.385878
O 0.177448 1.332833 0.966721
H 0.942593 1.482600 1.541461

```

---

Statistical Thermodynamic Analysis

Temperature= 298.150 Kelvin Pressure=  
1.00000 Atm

```

=====
=====
=====#SCF Energy= -1220.48215501 Predicted
Change= -8.027524D-10
Zero-point correction (ZPE)= -1220.2209
0.26117
Internal Energy (U)= -1220.2014
0.28067
Enthalpy (H)= -1220.2005 0.28162
Gibbs Free Energy (G)= -1220.2683
0.21376

```

-----  
 Frequencies -- -163.5426 -13.7997  
 36.0680

### TS 9<sub>OH</sub>

-----  
 Using Gaussian 09: AM64L-G09RevD.01 24-  
 Apr-2013

=====

```
#M062X/6-31G(d)
scf=(maxcycle=300,direct,tight) density=current
SCRFF=(PCM,SOLVENT=THF)
opt=(maxcycle=250,ts,calcfc, noeigentest,gdiis)
iop(1/8=18) freq=noraman
#N Geom=AllCheck Guess=TChech
SCRFF=Check Test GenChk RM062X/6-31G(d)
Freq
```

-----

```
Pointgroup= C1 Stoichiometry=
C11H13BFNNa2O6 C1[X(C11H13BFNNa2O6)]
#Atoms= 35
Charge = 0 Multiplicity = 1
```

-----

```
SCF Energy= -1382.20015120 Predicted
Change= -1.763390D-08
```

=====

```
Optimization completed. {Found 1
times}
Item Max Val. Criteria Pass? RMS Val.
Criteria Pass?
Force 0.00001 || 0.00045 [ YES ] 0.00000
|| 0.00030 [ YES ]
Displ 0.00207 || 0.00180 [ NO ] 0.00207 ||
0.00180 [ YES ]
```

-----

| Atomic<br>Type | Coordinates (Angstroms) |           |           |
|----------------|-------------------------|-----------|-----------|
|                | X                       | Y         | Z         |
| N              | -1.994983               | -1.910063 | -0.298460 |
| C              | -1.940224               | -3.288994 | -0.771663 |
| C              | -3.336041               | -1.351043 | -0.513010 |
| C              | -3.316451               | 0.177536  | -0.362078 |
| O              | -3.607019               | 0.668575  | 0.747966  |
| O              | -0.392769               | 0.272389  | -1.817657 |
| B              | 0.093262                | 0.182262  | -0.571474 |
| C              | 1.606277                | -0.168974 | -0.339398 |
| O              | -0.706602               | 0.389738  | 0.588137  |
| C              | -1.137205               | -0.449494 | 1.540650  |
| O              | -1.147426               | -0.115164 | 2.699500  |
| C              | -1.581876               | -1.830420 | 1.088679  |
| C              | 2.456183                | -0.376431 | -1.437169 |
| C              | 3.803423                | -0.675536 | -1.267732 |
| C              | 4.297895                | -0.770199 | 0.026667  |
| C              | 3.500685                | -0.578253 | 1.145181  |
| C              | 2.153799                | -0.278588 | 0.948526  |
| H              | -0.925887               | -3.677885 | -0.647420 |
| H              | -2.192340               | -3.315842 | -1.834384 |
| H              | -2.638335               | -3.950389 | -0.230456 |

|    |           |           |           |
|----|-----------|-----------|-----------|
| H  | -4.064831 | -1.784667 | 0.191863  |
| H  | -3.636604 | -1.594702 | -1.534908 |
| H  | -2.353820 | -2.166147 | 1.800688  |
| H  | -0.707696 | -2.480545 | 1.228578  |
| H  | 2.045610  | -0.302481 | -2.440264 |
| H  | 4.469850  | -0.841254 | -2.107398 |
| H  | 3.933483  | -0.670828 | 2.135429  |
| H  | 1.518342  | -0.123000 | 1.818566  |
| O  | -2.919698 | 0.849028  | -1.367535 |
| Na | -1.984964 | 2.398341  | 0.129976  |
| H  | -1.380931 | 0.409379  | -1.796847 |
| O  | 0.049519  | 2.897034  | -0.561720 |
| H  | 0.047142  | 2.624322  | -1.489311 |
| Na | 1.962860  | 2.847338  | 0.359395  |
| F  | 5.597877  | -1.057747 | 0.200883  |

-----

```
Statistical Thermodynamic Analysis
Temperature= 298.150 Kelvin Pressure=
1.00000 Atm
```

=====

```
SCF Energy= -1382.20015120 Predicted
Change= -1.763390D-08
Zero-point correction (ZPE)= -1381.9511
0.24903
Internal Energy (U)= -1381.9285
0.27164
Enthalpy (H)= -1381.9275
0.27259
Gibbs Free Energy (G)= -1382.0038
0.19626
```

-----

```
Frequencies -- -48.6560 29.2721
39.7512
```

### 10

-----

```
Using Gaussian 09: AM64L-G09RevD.01 24-  

Apr-2013
```

=====

```
#M062X/6-31G(d)
scf=(maxcycle=300,direct,tight) density=current
SCRFF=(PCM,SOLVENT=THF)
opt=(maxcycle=250) freq=noraman
#N Geom=AllCheck Guess=TChech
SCRFF=Check GenChk RM062X/6-31G(d) Freq
```

-----

```
Pointgroup= C1 Stoichiometry=
C11H14BFNNaO6 C1[X(C11H14BFNNaO6)]
#Atoms= 35
Charge = 0 Multiplicity = 1
```

-----

```
SCF Energy= -1220.49689491 Predicted
Change= -4.483678D-08
```

```

=====
=====
=====
Optimization completed.      {Found 2
times}
Item Max Val. Criteria Pass? RMS Val.
Criteria Pass?
Force 0.00004 || 0.00045 [YES] 0.00000
|| 0.00030 [YES]
Displ 0.00161 || 0.00180 [YES] 0.00161 ||
0.00180 [YES]
-----

```

```

-----
Atomic Coordinates (Angstroms)
Type X Y Z
-----
N -3.609756 -1.024941 -0.628883
C -4.580940 -1.946631 -1.207975
C -3.604290 -1.193248 0.829281
C -2.627591 -0.211058 1.449971
O -1.419434 -0.727160 1.584092
O 0.787369 2.033848 -1.273346
B 0.785981 0.885210 -0.414466
C 2.253511 0.257870 -0.220660
O -0.148059 -0.225678 -0.926859
C -1.411070 0.028493 -1.078984
O -1.897836 1.161580 -1.097571
C -2.292408 -1.210272 -1.227158
C 3.373009 0.769213 -0.885715
C 4.648748 0.236318 -0.700758
C 4.792552 -0.833817 0.167347
C 3.716985 -1.384246 0.848230
C 2.457037 -0.826256 0.645137
H -4.646216 -1.775709 -2.285374
H -5.564145 -1.758640 -0.768380
H -4.319643 -3.004536 -1.033364
H -3.318195 -2.216811 1.124051
H -4.607160 -0.975210 1.202974
H -1.749487 -2.078586 -0.823531
H -2.426799 -1.372159 -2.302702
H 3.238763 1.605506 -1.566620
H 5.520766 0.630886 -1.212365
H 3.878986 -2.224362 1.515793
H 1.604765 -1.252904 1.172249
O -2.905745 0.947314 1.712180
Na -1.603136 2.592547 0.664835
H -0.108582 2.159229 -1.616675
F 6.020770 -1.359631 0.358171
H -0.729635 0.015438 1.583036
O 0.179977 1.198462 0.962007
H 0.889103 1.489914 1.552364
-----

```

```

-----
Statistical Thermodynamic Analysis
Temperature= 298.150 Kelvin Pressure=
1.00000 Atm
=====
=====
=====

```

```

SCF Energy= -1220.49689491 Predicted
Change= -4.483678D-08
Zero-point correction (ZPE)= -1220.2338
0.26306
Internal Energy (U)= -1220.2135
0.28339
Enthalpy (H)= -1220.2125 0.28433
Gibbs Free Energy (G)= -1220.2828
0.21404
-----
-----
Frequencies -- 28.1408 37.6213
44.5463

```

**10<sub>OH</sub>**

```

-----
Using Gaussian 09: AM64L-G09RevD.01 24-Apr-
2013
-----

```

```

#M062X/6-31G(d)
scf=(maxcycle=300,direct,tight) density=current
SCRF=(PCM,SOLVENT=THF)
opt=(maxcycle=250) freq=noraman
#N Geom=AllCheck Guess=TChech
SCRF=Check GenChk RM062X/6-31G(d) Freq
-----

```

```

Pointgroup= C1 Stoichiometry=
C11H13BFNNa2O6 C1[X(C11H13BFNNa2O6)]
#Atoms= 35
Charge = 0 Multiplicity = 1
-----

```

```

SCF Energy= -1382.24928037 Predicted
Change= -1.075261D-08
-----

```

```

Optimization completed.      {Found 1
times}
Item Max Val. Criteria Pass? RMS Val.
Criteria Pass?
Force 0.00001 || 0.00045 [YES] 0.00000
|| 0.00030 [YES]
Displ 0.00327 || 0.00180 [NO] 0.00327 ||
0.00180 [YES]
-----

```

```

-----
Atomic Coordinates (Angstroms)
Type X Y Z
-----
N 2.603500 0.765599 1.377657
C 3.668302 0.766669 2.370770
C 2.180321 -0.604106 1.074721
C 3.173098 -1.230549 0.090902
O 4.017049 -2.048782 0.519004
O -1.601723 2.150211 -1.398122
B -1.350448 0.929884 -0.700089
C -2.708334 0.172969 -0.270650
O -0.577536 1.213353 0.656741
C 0.576978 1.780423 0.577445
O 1.018248 2.356827 -0.426814
C 1.480334 1.601312 1.791626
C -2.699716 -0.914616 0.613704

```

```

C   -3.863329   -1.599972   0.960532
C   -5.060552   -1.176819   0.405040
C   -5.129581   -0.104628  -0.470187
C   -3.947229   0.558363   -0.796597
H    4.052269   1.782245   2.499812
H    4.481547   0.123542   2.023944
H    3.326521   0.389382   3.350540
H    1.196203  -0.579697   0.594546
H    2.108630  -1.220507   1.985388
H    0.910604   1.170520   2.630533
H    1.871073   2.578846   2.090034
H   -1.757916  -1.232326   1.060452
H   -3.858526  -2.440773   1.646721
H   -6.091544   0.194747  -0.874170
H   -3.983214   1.406967  -1.474765
O    3.102191  -0.851146  -1.122602
Na   4.957863  -2.160088  -1.553612
H   -0.750871   2.607589  -1.470437
O   -0.424334   0.041414  -1.456438
H   -0.583390  -0.879047  -1.209446
Na   1.687066   0.720364  -1.885260
F   -6.197862  -1.829160   0.730368

```

## Statistical Thermodynamic Analysis

```

Temperature= 298.150 Kelvin   Pressure=
1.00000 Atm
=====
SCF Energy=  -1382.24928037   Predicted
Change= -1.075261D-08
Zero-point correction (ZPE)=      -1381.9980
      0.25127
Internal Energy (U)=              -1381.9753
      0.27395
Enthalpy (H)=                    -1381.9743
      0.27490
Gibbs Free Energy (G)=           -1382.0526
      0.19665

```

```

Frequencies --   8.1681       34.1009
43.5398

```

**TS-11**

```

-----
Using Gaussian 09: AM64L-G09RevD.01 24-
Apr-2013
=====
=====
=====

```

```

=====
#M062X/6-31G(d)
scf=(maxcycle=300,direct,tight) density=current
SCRF=(PCM,SOLVENT=THF)
opt=(maxcycle=250,ts,calcfc,noeigentest,gdiis)
iop(1/8=18) freq=noraman
#N Geom=AllCheck Guess=TCheck
SCRF=Check Test GenChk RM062X/6-31G(d)
Freq
-----

```

```

Pointgroup= C1   Stoichiometry=
C11H14BFNNaO6  C1[X(C11H14BFNNaO6)]
#Atoms= 35
Charge = 0   Multiplicity = 1
-----

```

```

SCF Energy= -1220.47272964   Predicted
Change= -1.934700D-09
=====
=====
=====

```

```

Optimization completed.      {Found 2
times}

```

| Item     | Max Val. | Criteria | Pass?   | RMS Val. |
|----------|----------|----------|---------|----------|
| Criteria | Pass?    |          |         |          |
| Force    | 0.00001  | 0.00045  | [ YES ] | 0.00000  |
|          | 0.00030  | [ YES ]  |         |          |
| Displ    | 0.00068  | 0.00180  | [ YES ] | 0.00068  |
| 0.00180  | [ YES ]  |          |         |          |

```

-----
Atomic      Coordinates (Angstroms)
Type       X         Y         Z
-----

```

| Atomic Type | X         | Y         | Z         |
|-------------|-----------|-----------|-----------|
| N           | -3.877602 | -0.916266 | -0.467105 |
| C           | -4.997323 | -1.750978 | -0.887506 |
| C           | -3.900000 | -0.805049 | 0.993164  |
| C           | -2.797782 | 0.131623  | 1.439776  |
| O           | -1.666180 | -0.512230 | 1.686273  |
| O           | 0.763228  | 1.546217  | -1.536464 |
| B           | 1.075671  | 0.948584  | -0.349219 |
| C           | 2.502886  | 0.332207  | -0.125625 |
| O           | -0.304812 | -0.867519 | -0.843069 |
| C           | -1.458355 | -0.436191 | -1.033153 |
| O           | -1.763781 | 0.773702  | -1.294998 |
| C           | -2.613779 | -1.452644 | -0.970291 |
| C           | 3.483394  | 0.471256  | -1.117435 |
| C           | 4.764287  | -0.046621 | -0.954544 |
| C           | 5.052328  | -0.724895 | 0.220786  |
| C           | 4.114582  | -0.902448 | 1.226963  |
| C           | 2.843978  | -0.365933 | 1.040662  |
| H           | -5.031883 | -1.787563 | -1.979224 |
| H           | -5.933902 | -1.316579 | -0.526594 |
| H           | -4.923966 | -2.784092 | -0.504455 |
| H           | -3.762167 | -1.783110 | 1.485733  |
| H           | -4.859032 | -0.378944 | 1.296352  |
| H           | -2.272044 | -2.329195 | -0.396695 |
| H           | -2.784407 | -1.781654 | -2.002037 |
| H           | 3.231974  | 0.997403  | -2.033893 |
| H           | 5.532377  | 0.061460  | -1.712706 |
| H           | 4.385314  | -1.451449 | 2.122233  |
| H           | 2.100120  | -0.518343 | 1.820262  |
| O           | -2.909379 | 1.342924  | 1.502199  |
| Na          | -1.586633 | 2.538208  | 0.080197  |
| H           | -0.207821 | 1.413222  | -1.678746 |
| F           | 6.286212  | -1.232118 | 0.390112  |
| H           | -0.908012 | 0.114532  | 1.594401  |
| O           | 0.286831  | 1.257125  | 0.806357  |
| H           | 0.862832  | 1.360298  | 1.578861  |



```

-----
-----
Statistical Thermodynamic Analysis
Temperature= 298.150 Kelvin   Pressure=
1.00000 Atm
=====
=====
SCF Energy= -1220.47272964 Predicted
Change= -1.934700D-09
Zero-point correction (ZPE)= -1220.2106
0.26210
Internal Energy (U)= -1220.1902
0.28243
Enthalpy (H)= -1220.1893 0.28337
Gibbs Free Energy (G)= -1220.2603
0.21240
-----
-----
Frequencies -- -133.9353      25.6992
32.8212

```

**TS-11<sub>OH</sub>**

```

-----
-----
Using Gaussian 09: AM64L-G09RevD.01 24-
Apr-2013
=====
=====
#M062X/6-31G(d)
scf=(maxcycle=300,direct,tight) density=current
SCRF=(PCM,SOLVENT=THF)
opt=(maxcycle=250,ts,calcfc,noeigentest)
freq=noraman
#N Geom=AllCheck Guess=TCheck
SCRF=Check GenChk RM062X/6-31G(d) Freq
-----
-----
Pointgroup= C1  Stoichiometry=
C11H13BFNNa2O6  C1[X(C11H13BFNNa2O6)]
#Atoms= 35
Charge = 0      Multiplicity = 1

```

```

-----
-----
SCF Energy= -1382.24460597      Predicted
Change= -1.030962D-08
=====
-----
Optimization completed.      {Found 2
times}
Item  Max Val.  Criteria  Pass?  RMS Val.
Criteria  Pass?
Force  0.00000 || 0.00045 [YES]  0.00000
|| 0.00030 [YES]
Displ  0.00064 || 0.00180 [YES]  0.00064 ||
0.00180 [YES]

```

```

-----
-----
Atomic      Coordinates (Angstroms)
Type        X          Y          Z
-----
-----
N   -0.821025  -1.821552  0.848002
C    0.197731  -2.699284  1.387186
C   -1.848012  -2.519669  0.084369
C   -2.614998  -1.469254  -0.728292

```

```

O   -3.674699  -1.008245  -0.230735
O   -0.877968   1.387388  -1.969100
B    0.054498   1.637153  -0.959190
C    1.313239   0.700024  -0.739544
O   -1.120087   1.126233   0.564555
C   -0.728059   0.487036   1.617907
O    0.106386   0.939777   2.417461
C   -1.341586  -0.892560   1.848217
C    2.519735   1.218315  -0.252716
C    3.654714   0.424920  -0.094061
C    3.568121  -0.911192  -0.448395
C    2.402045  -1.471582  -0.948426
C    1.279496  -0.659641  -1.084978
H    0.993523  -2.096007   1.835888
H    0.641100  -3.286884   0.577716
H   -0.192081  -3.393816   2.153331
H   -2.543487  -3.088358   0.725236
H   -1.345353  -3.210144  -0.599446
H   -2.428153  -0.808786   1.746714
H   -1.107406  -1.225942   2.867209
H    2.584439   2.275776  -0.005579
H    4.591656   0.822472   0.281520
H    2.389460  -2.522211  -1.220366
H    0.353737  -1.098611  -1.449805
O   -2.078972  -1.052661  -1.794872
Na  -2.928919  1.051123  -0.886290
H   -1.027841   0.425641  -2.094109
O    0.267776   3.009622  -0.686131
H   -0.419463   3.534140  -1.123086
Na    0.171866   3.040933   1.588122
F    4.657566  -1.692709  -0.312495

```

```

-----
-----
Statistical Thermodynamic Analysis
Temperature= 298.150 Kelvin   Pressure=
1.00000 Atm
=====
=====
SCF Energy= -1382.24460597      Predicted
Change= -1.030962D-08
Zero-point correction (ZPE)= -1381.9931
0.25144
Internal Energy (U)= -1381.9714
0.27317
Enthalpy (H)= -1381.9704
0.27412
Gibbs Free Energy (G)= -1382.0433
0.20130
-----
-----
Frequencies -- -210.2444      38.7881
45.1539

```

**2+3**

```

-----
-----
Using Gaussian 09: AM64L-G09RevD.01 24-
Apr-2013
=====
=====
#M062X/6-31G(d)
scf=(maxcycle=300,direct,tight) density=current
SCRF=(PCM,SOLVENT=THF)
opt=(maxcycle=250) freq=noraman

```

```

#N Geom=AllCheck Guess=TCheck
SCRF=Check GenChk RM062X/6-31G(d) Freq
-----
Pointgroup= C1  Stoichiometry=
C11H13BFNNa2O6  C1[X(C11H13BFNNa2O6)]
#Atoms= 35
Charge = 0      Multiplicity = 1
-----
SCF Energy= -1382.27440700    Predicted
Change= -1.083996D-07
=====
Optimization completed.      {Found 1
times}
Item  Max Val.  Criteria  Pass?  RMS Val.
Criteria  Pass?
Force  0.00004 || 0.00045 [YES]   0.00000
|| 0.00030 [YES]
Displ  0.00390 || 0.00180 [NO]   0.00390 ||
0.00180 [YES]
-----

```

| Atomic Type | Coordinates (Angstroms) |           |           |
|-------------|-------------------------|-----------|-----------|
|             | X                       | Y         | Z         |
| N           | -4.176450               | -0.256460 | 0.058205  |
| C           | -5.611734               | -0.502672 | 0.199659  |
| C           | -3.482492               | -0.545405 | 1.322176  |
| C           | -1.983695               | -0.839965 | 1.117859  |
| O           | -1.716558               | -1.816177 | 0.351816  |
| O           | 0.659900                | 0.716336  | -0.705589 |
| B           | 1.382641                | -0.428694 | -0.451575 |
| C           | 2.940418                | -0.259287 | -0.276524 |
| C           | -2.480182               | 1.413503  | -0.659144 |
| O           | -1.933836               | 2.399879  | -0.126569 |
| C           | -3.956712               | 1.138838  | -0.337678 |
| C           | 3.731800                | -1.343748 | 0.126840  |
| C           | 5.106052                | -1.219666 | 0.307700  |
| C           | 5.686675                | 0.019229  | 0.078844  |
| C           | 4.950322                | 1.123654  | -0.323165 |

|    |           |           |           |
|----|-----------|-----------|-----------|
| C  | 3.577722  | 0.969351  | -0.498907 |
| H  | -6.065817 | 0.125421  | 0.983411  |
| H  | -5.780060 | -1.552360 | 0.453488  |
| H  | -6.112818 | -0.287466 | -0.748192 |
| H  | -3.924862 | -1.450686 | 1.750731  |
| H  | -3.606542 | 0.276699  | 2.043569  |
| H  | -4.544792 | 1.336744  | -1.241482 |
| H  | -4.286892 | 1.835103  | 0.448766  |
| H  | 3.254561  | -2.303851 | 0.301942  |
| H  | 5.726889  | -2.052718 | 0.619924  |
| H  | 5.452963  | 2.070173  | -0.491351 |
| H  | 2.984939  | 1.822368  | -0.818946 |
| O  | -1.146496 | -0.131370 | 1.711374  |
| Na | -0.192412 | 1.806162  | 1.158743  |
| H  | -0.278593 | 0.581502  | -1.016058 |
| Na | -2.786877 | -1.494786 | -1.582414 |
| O  | 0.853495  | -1.670279 | -0.325346 |
| H  | -0.119498 | -1.695127 | -0.108616 |
| O  | -1.916760 | 0.587798  | -1.443129 |
| F  | 7.014184  | 0.155030  | 0.254135  |

```

-----
Statistical Thermodynamic Analysis
Temperature= 298.150 Kelvin  Pressure=
1.00000 Atm
=====
SCF Energy= -1382.27440700    Predicted
Change= -1.083996D-07
Zero-point correction (ZPE)=      -1382.0226
0.25178
Internal Energy (U)=              -1382.0002
0.27412
Enthalpy (H)=                      -1381.9993
0.27506
Gibbs Free Energy (G)=              -1382.0755
0.19884
-----
Frequencies --  26.7532      28.4982
49.5303

```

## 4. Fast-Release Hydrolysis: Alternative Mechanism after First Hydroxide Attack

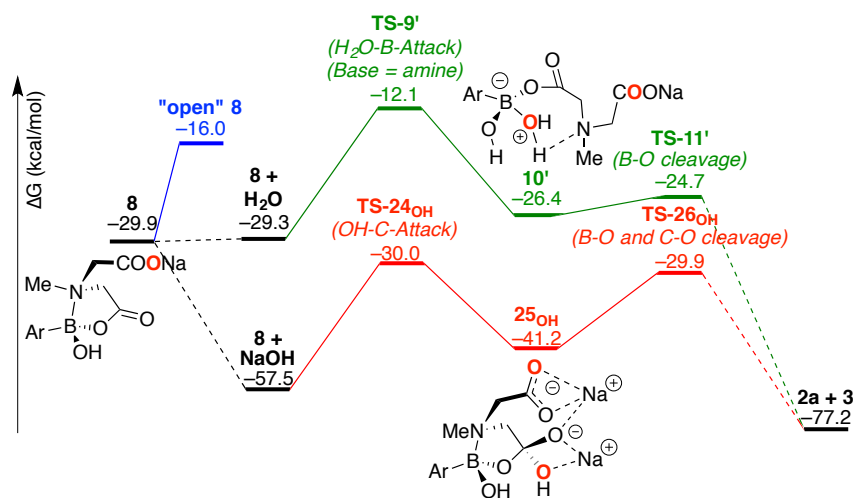

**Figure 35.** Alternate hydrolysis pathway after the first hydroxide attack.

**MIDA amine-mediated water attack of 8 + H<sub>2</sub>O:** Water attack at the boron, mediated by the MIDA amine (**TS-9'**) forms the boron-hydrolyzed intermediate **10'**. B-O bond cleavage releases **2a** and **3**. The MIDA amine mediated second stage hydrolysis is disfavoured over the MIDA carboxylate-mediated process by 2.1 kcal/mol. However, this pathway results in single incorporation of <sup>18</sup>O into MIDA after hydrolysis, consistent with observations.

**NaOH attack of 8 + NaOH:** The second hydroxide attack at the bound MIDA ester carbonyl (**TS-24**) forms the ester-hydrolyzed intermediate **25**. Concurrent boronate and enolate tetrahedral collapse releases **2a** and **3**. The C-attack **TS-24** is disfavoured over the hydroxide Backside-S<sub>N</sub>2-Attack **TS-9** by 2.2 kcal/mol. This pathway would also result in double incorporation of <sup>18</sup>O into MIDA after hydrolysis; an outcome inconsistent with observations.

**B-N dissociation to "open" 8:** The B-N bond in intermediate **8** is more labile than in MIDA **1a** ( $\Delta G_{\text{"open"} - \text{"closed"} \text{ 8}} = 13.9$  kcal/mol). Consequent attack at the boron with either hydroxide or water ultimately leads to **2a** and **3**.

#### Geometries, Energies, and Thermal Corrections

##### TS-9'

Using Gaussian 09: AM64L-G09RevD.01 24-Apr-2013

#M062X/6-31G(d)  
scf=(maxcycle=300,direct,tight) density=current

SCRF=(PCM,SOLVENT=THF)  
opt=(maxcycle=250,ts,calcfc, noeigentest,gdiis)  
iop(1/8=18) freq=noraman  
#N Geom=AllCheck Guess=TCheck  
SCRF=Check Test GenChk RM062X/6-31G(d)  
Freq  
Pointgroup= C1 Stoichiometry=  
C11H14BFNNaO6 C1[X(C11H14BFNNaO6)]  
#Atoms= 35

Charge = 0 Multiplicity = 1

-----  
 SCF Energy= -1220.46771694 Predicted  
 Change= -1.523254D-08  
 =====

=====  
 Optimization completed. {Found 1  
 times}  
 Item Max Val. Criteria Pass? RMS Val.  
 Criteria Pass?  
 Force 0.00002 || 0.00045 [ YES ] 0.00000  
 || 0.00030 [ YES ]  
 Displ 0.00228 || 0.00180 [ NO ] 0.00228 ||  
 0.00180 [ YES ]  
 -----

-----  
 Atomic Coordinates (Angstroms)  
 Type X Y Z  
 -----

|    |           |           |           |
|----|-----------|-----------|-----------|
| C  | 1.738721  | 1.130496  | 1.447199  |
| C  | 0.948922  | -0.171430 | 1.486752  |
| B  | -0.387565 | -0.400653 | -0.707525 |
| N  | 2.268659  | 1.563949  | 0.157956  |
| C  | -1.901538 | -0.244888 | -0.371554 |
| C  | -2.387515 | -0.460082 | 0.924427  |
| C  | -2.816342 | 0.105885  | -1.374555 |
| C  | -3.740559 | -0.321994 | 1.222889  |
| H  | -1.700580 | -0.746023 | 1.717269  |
| C  | -4.171473 | 0.250103  | -1.102063 |
| H  | -2.458160 | 0.268838  | -2.387871 |
| C  | -4.604416 | 0.034202  | 0.199175  |
| H  | -4.131404 | -0.483711 | 2.221585  |
| H  | -4.889500 | 0.524444  | -1.867360 |
| O  | 0.549257  | -0.688118 | 0.309455  |
| O  | 0.716408  | -0.728543 | 2.527021  |
| C  | 3.468423  | 0.823974  | -0.264961 |
| C  | 3.162211  | -0.665123 | -0.434820 |
| O  | 0.065049  | -0.536174 | -1.974405 |
| O  | 3.326455  | -1.395271 | 0.569728  |
| H  | 2.523144  | 1.034284  | 2.213221  |
| H  | 1.038359  | 1.898185  | 1.798372  |
| H  | 4.272867  | 0.942183  | 0.477351  |
| H  | 3.792429  | 1.242317  | -1.220635 |
| C  | 2.595751  | 2.994054  | 0.231764  |
| H  | 2.972426  | 3.323938  | -0.739108 |
| H  | 1.692145  | 3.562441  | 0.465712  |
| H  | 3.360309  | 3.200305  | 0.996302  |
| O  | -0.137454 | 2.165979  | -1.020062 |
| H  | -0.321472 | 1.874728  | -1.924910 |
| F  | -5.912609 | 0.172567  | 0.474848  |
| H  | 0.787391  | 1.868559  | -0.852020 |
| O  | 2.691287  | -1.059420 | -1.544753 |
| H  | 1.053120  | -0.620206 | -1.972844 |
| Na | 1.803499  | -2.846052 | -0.317103 |

-----  
 Statistical Thermodynamic Analysis

Temperature= 298.150 Kelvin Pressure=  
1.00000 Atm

=====  
 SCF Energy= -1220.46771694 Predicted  
 Change= -1.523254D-08  
 Zero-point correction (ZPE)= -1220.2062  
 0.26146  
 Internal Energy (U)= -1220.1852  
 0.28250  
 Enthalpy (H)= -1220.1842 0.28344  
 Gibbs Free Energy (G)= -1220.2568  
 0.21082  
 -----

-----  
 Frequencies -- -39.8173 27.7342  
 39.4198

**10'**

-----  
 Using Gaussian 09: AM64L-G09RevD.01 24-  
 Apr-2013  
 =====

=====  
 #M062X/6-31G(d)  
 scf=(maxcycle=300,direct,tight) density=current  
 SCRF=(PCM,SOLVENT=THF)  
 opt=(maxcycle=250) freq=noraman  
 #N Geom=AllCheck Guess=TCheck  
 SCRF=Check GenChk RM062X/6-31G(d) Freq  
 -----

-----  
 Pointgroup= C1 Stoichiometry=  
 C11H14BFNNaO6 C1[X(C11H14BFNNaO6)]  
 #Atoms= 35  
 Charge = 0 Multiplicity = 1  
 -----

-----  
 SCF Energy= -1220.49489719 Predicted  
 Change= -3.125941D-07  
 =====

=====  
 Optimization completed. {Found 1  
 times}  
 Item Max Val. Criteria Pass? RMS Val.  
 Criteria Pass?  
 Force 0.00009 || 0.00045 [ YES ] 0.00001  
 || 0.00030 [ YES ]  
 Displ 0.00482 || 0.00180 [ NO ] 0.00482 ||  
 0.00180 [ YES ]  
 -----

-----  
 Atomic Coordinates (Angstroms)  
 Type X Y Z  
 -----

## TS-11'

```

-----
C -1.605993 -1.812963 0.629067
C -0.959351 -0.633954 1.368155
B 0.369739 0.316480 -0.730687
N -2.562062 -1.366711 -0.431866
C 1.938727 0.120023 -0.415919
C 2.429878 -1.116070 0.025902
C 2.864926 1.158606 -0.568050
C 3.776936 -1.319984 0.315964
H 1.740978 -1.951565 0.141701
C 4.220806 0.987993 -0.288178
H 2.515826 2.124850 -0.923156
C 4.648541 -0.253983 0.152208
H 4.157828 -2.275906 0.660470
H 4.942081 1.790060 -0.407326
O -0.393986 0.303980 0.653227
O -1.029373 -0.601170 2.579319
C -3.640957 -0.479119 0.112556
C -3.149794 0.984755 0.041889
O 0.096957 1.625593 -1.285639
O -3.230644 1.675623 1.075527
H -2.158115 -2.414185 1.351867
H -0.839901 -2.410513 0.134067
H -3.874240 -0.792654 1.130578
H -4.520674 -0.594122 -0.523858
C -3.092115 -2.543897 -1.171229
H -3.731260 -2.186743 -1.978070
H -2.247303 -3.099862 -1.578755
H -3.664222 -3.167242 -0.482730
O -0.220879 -0.777876 -1.508189
H 0.230821 -0.847150 -2.359595
F 5.957452 -0.433959 0.427566
H -1.983899 -0.813649 -1.105317
O -2.660595 1.316137 -1.068125
H -0.805553 1.575046 -1.649685
Na -1.125015 2.551556 0.512279
-----

```

```

-----
Statistical Thermodynamic Analysis
Temperature= 298.150 Kelvin Pressure=
1.00000 Atm
-----

```

```

=====
SCF Energy= -1220.49489719 Predicted
Change= -3.125941D-07
Zero-point correction (ZPE)= -1220.2300
0.26482
Internal Energy (U)= -1220.2093
0.28552
Enthalpy (H)= -1220.2084 0.28647
Gibbs Free Energy (G)= -1220.2797
0.21513
-----

```

```

-----
Frequencies -- 32.9718 38.8499
48.5379
-----

```

```

-----
Using Gaussian 09: AM64L-G09RevD.01 24-
Apr-2013
-----

```

```

=====
=====
====
#M062X/6-31G(d)
scf=(maxcycle=300,direct,tight) density=current
SCRF=(PCM,SOLVENT=THF)
opt=(maxcycle=250,ts,calcfc,noeigentest,gdiis)
iop(1/8=18) freq=noraman
#N Geom=AllCheck Guess=TCHECK
SCRF=Check Test GenChk RM062X/6-31G(d)
Freq
-----

```

```

-----
Pointgroup= C1 Stoichiometry=
C11H14BFNNaO6 C1[X(C11H14BFNNaO6)]
#Atoms= 35
Charge = 0 Multiplicity = 1
-----

```

```

-----
SCF Energy= -1220.49212460 Predicted
Change= -3.874607D-10
-----

```

```

=====
====
Optimization completed. {Found 2
times}
Item Max Val. Criteria Pass? RMS Val.
Criteria Pass?
Force 0.00000 || 0.00045 [YES] 0.00000
|| 0.00030 [YES]
Displ 0.00038 || 0.00180 [YES] 0.00038 ||
0.00180 [YES]
-----

```

```

-----
Atomic Coordinates (Angstroms)
Type X Y Z
-----

```

```

-----
C -1.792825 -2.072780 0.362466
C -0.703358 -1.307427 1.142849
B 0.287649 0.481577 -0.871333
N -2.712467 -1.158231 -0.368392
C 1.819308 0.221708 -0.548215
C 2.319585 -1.061740 -0.286818
C 2.727431 1.287659 -0.529821
C 3.667156 -1.284556 -0.018309
H 1.644288 -1.915789 -0.270109
C 4.081940 1.095576 -0.264108
H 2.365440 2.291768 -0.735470
C 4.523853 -0.193616 -0.013514
H 4.058728 -2.274597 0.189887
H 4.790477 1.917165 -0.252280
O -0.544430 -0.072746 0.816701
O -0.087808 -1.941368 1.986859
-----

```

|    |           |           |           |
|----|-----------|-----------|-----------|
| C  | -3.402873 | -0.179488 | 0.541600  |
| C  | -2.993599 | 1.243184  | 0.105390  |
| O  | -0.133008 | 1.813590  | -0.845882 |
| O  | -2.853687 | 2.093513  | 1.009503  |
| H  | -2.380995 | -2.689315 | 1.044819  |
| H  | -1.315568 | -2.723867 | -0.375361 |
| H  | -3.109028 | -0.374316 | 1.571809  |
| H  | -4.481996 | -0.317484 | 0.443970  |
| C  | -3.665050 | -1.893154 | -1.241801 |
| H  | -4.248758 | -1.153516 | -1.789750 |
| H  | -3.097802 | -2.513654 | -1.936142 |
| H  | -4.312828 | -2.513004 | -0.620778 |
| O  | -0.384037 | -0.378497 | -1.772143 |
| H  | 0.183135  | -1.108415 | -2.054406 |
| F  | 5.830494  | -0.394858 | 0.243715  |
| H  | -2.114889 | -0.587109 | -1.001105 |
| O  | -2.808681 | 1.375755  | -1.128020 |
| H  | -1.060287 | 1.863434  | -1.171966 |
| Na | -0.621959 | 2.099816  | 1.424037  |

Statistical Thermodynamic Analysis  
 Temperature= 298.150 Kelvin Pressure=  
 1.00000 Atm

SCF Energy= -1220.49212460 Predicted  
 Change= -3.874607D-10  
 Zero-point correction (ZPE)= -1220.2278  
 0.26424  
 Internal Energy (U)= -1220.2076  
 0.28442  
 Enthalpy (H)= -1220.2067 0.28537  
 Gibbs Free Energy (G)= -1220.2770  
 0.21506

Frequencies -- -207.2653 28.4388  
 41.6082

### TS-24<sub>OH</sub>

Using Gaussian 09: AM64L-G09RevD.01 24-Apr-2013

#M062X/6-31G(d) scf=(maxcycle=300,direct,tight)  
 density=current  
 SCRF=(PCM,SOLVENT=THF)  
 opt=(maxcycle=250,ts,calcfc,noeigentest,gdiis)  
 iop(1/8=18) freq=noraman  
 #N Geom=AllCheck Guess=TCheck  
 SCRF=Check Test GenChk RM062X/6-31G(d)  
 Freq

Pointgroup= C1 Stoichiometry=  
 C11H13BFNNa2O6 C1[X(C11H13BFNNa2O6)]  
 #Atoms= 35  
 Charge = 0 Multiplicity = 1

SCF Energy= -1382.20301864 Predicted  
 Change= -3.903319D-08

Optimization completed. {Found 2  
 times}  
 Item Max Val. Criteria Pass? RMS Val.  
 Criteria Pass?  
 Force 0.00008 || 0.00045 [ YES ] 0.00001  
 || 0.00030 [ YES ]  
 Displ 0.00170 || 0.00180 [ YES ] 0.00170 ||  
 0.00180 [ YES ]

| Atomic Type | Coordinates (Angstroms) |           |           |
|-------------|-------------------------|-----------|-----------|
|             | X                       | Y         | Z         |
| N           | -0.403250               | -0.922877 | 1.066070  |
| C           | 0.599861                | -1.234127 | 2.110360  |
| C           | -1.421155               | -2.024796 | 1.086366  |
| C           | -2.666506               | -1.686733 | 0.243584  |
| O           | -3.629172               | -1.155747 | 0.840110  |
| O           | 0.115110                | -1.937783 | -1.257600 |
| B           | 0.312893                | -0.753112 | -0.535329 |
| C           | 1.860940                | -0.362385 | -0.401001 |
| O           | -0.576807               | 0.370877  | -1.005500 |
| C           | -1.361357               | 0.916522  | -0.111327 |
| O           | -2.444491               | 1.450008  | -0.418240 |
| C           | -1.035456               | 0.403602  | 1.290429  |
| C           | 2.837770                | -1.322256 | -0.697189 |
| C           | 4.199801                | -1.049034 | -0.583151 |
| C           | 4.579872                | 0.214766  | -0.160452 |
| C           | 3.654377                | 1.200754  | 0.143233  |
| C           | 2.297825                | 0.903527  | 0.018203  |
| H           | 1.345054                | -0.440716 | 2.144257  |
| H           | 1.091315                | -2.174559 | 1.850431  |
| H           | 0.106350                | -1.329066 | 3.081873  |
| H           | -1.735447               | -2.173105 | 2.122830  |
| H           | -0.926328               | -2.919721 | 0.706936  |
| H           | -1.933783               | 0.321978  | 1.905835  |
| H           | -0.307401               | 1.082534  | 1.730327  |
| H           | 2.519790                | -2.305891 | -1.032421 |
| H           | 4.959794                | -1.788954 | -0.812928 |
| H           | 4.001896                | 2.176678  | 0.467403  |
| H           | 1.559659                | 1.672278  | 0.253800  |
| O           | -2.609873               | -1.897781 | -1.001722 |
| Na          | -3.999045               | -0.030203 | -1.182293 |
| H           | -0.847596               | -2.062672 | -1.395993 |
| Na          | -2.197293               | 3.646062  | 0.099271  |
| O           | -0.216979               | 2.835697  | 0.274663  |
| H           | 0.151962                | 2.862435  | -0.621019 |
| F           | 5.894955                | 0.494314  | -0.040216 |

Statistical Thermodynamic Analysis  
 Temperature= 298.150 Kelvin Pressure=  
 1.00000 Atm

SCF Energy= -1382.20301864 Predicted  
 Change= -3.903319D-08  
 Zero-point correction (ZPE)= -1381.9511  
 0.25184

Internal Energy (U)= -1381.9300  
0.27300  
Enthalpy (H)= -1381.9290  
0.27394  
Gibbs Free Energy (G)= -1382.0003  
0.20263

-----  
Frequencies -- -227.9753 43.5680  
44.8043

**25<sub>OH</sub>**

-----  
Using Gaussian 09: AM64L-G09RevD.01 24-  
Apr-2013

=====

```
#M062X/6-31G(d)
scf=(maxcycle=300,direct,tight) density=current
SCRFF=(PCM,SOLVENT=THF)
opt=(maxcycle=250) freq=noraman
#N Geom=AllCheck Guess=TChech
SCRFF=Check GenChk RM062X/6-31G(d) Freq
```

-----  
Pointgroup= C1 Stoichiometry=  
C11H13BFNNa2O6 C1[X(C11H13BFNNa2O6)]  
#Atoms= 35  
Charge = 0 Multiplicity = 1

-----  
SCF Energy= -1382.22522952 Predicted  
Change= -4.238245D-08

=====

```
Optimization completed. {Found 1
times}
Item Max Val. Criteria Pass? RMS Val.
Criteria Pass?
Force 0.00002 || 0.00045 [ YES ] 0.00000
|| 0.00030 [ YES ]
Displ 0.00277 || 0.00180 [ NO ] 0.00277 ||
0.00180 [ YES ]
```

| Atomic<br>Type | Coordinates (Angstroms) |           |           |
|----------------|-------------------------|-----------|-----------|
|                | X                       | Y         | Z         |
| N              | -0.701066               | -1.174395 | 1.023615  |
| C              | 0.159394                | -1.820305 | 2.036260  |
| C              | -1.802814               | -2.143093 | 0.709685  |
| C              | -2.872830               | -1.555099 | -0.235290 |
| O              | -3.781585               | -0.877909 | 0.287088  |
| O              | -0.015725               | -1.766582 | -1.415110 |
| B              | 0.117757                | -0.712929 | -0.490498 |
| C              | 1.699159                | -0.394952 | -0.272044 |
| O              | -0.709697               | 0.467895  | -0.749179 |
| C              | -1.134322               | 1.187287  | 0.398702  |
| O              | -2.224893               | 1.890438  | 0.172451  |
| C              | -1.238499               | 0.119610  | 1.537603  |
| C              | 2.627316                | -1.377428 | 0.113528  |
| C              | 3.998065                | -1.141240 | 0.148873  |
| C              | 4.462459                | 0.108489  | -0.234986 |

|    |           |           |           |
|----|-----------|-----------|-----------|
| C  | 3.605778  | 1.104258  | -0.667429 |
| C  | 2.235671  | 0.834540  | -0.686052 |
| H  | 1.005513  | -1.170216 | 2.261027  |
| H  | 0.525873  | -2.769783 | 1.641556  |
| H  | -0.415297 | -2.009629 | 2.948648  |
| H  | -2.283763 | -2.419044 | 1.653491  |
| H  | -1.334009 | -3.017078 | 0.255934  |
| H  | -2.284401 | 0.002453  | 1.822511  |
| H  | -0.651669 | 0.425991  | 2.405912  |
| H  | 2.277904  | -2.372150 | 0.375357  |
| H  | 4.705781  | -1.905147 | 0.454175  |
| H  | 4.009031  | 2.057420  | -0.993840 |
| H  | 1.561575  | 1.602054  | -1.058033 |
| O  | -2.721951 | -1.740381 | -1.478953 |
| Na | -3.026669 | 0.621196  | -1.486648 |
| H  | -0.964986 | -1.864134 | -1.647409 |
| O  | -0.085299 | 2.136209  | 0.776407  |
| Na | -1.410983 | 3.923412  | 0.422131  |
| H  | 0.763830  | 1.672807  | 0.854327  |
| F  | 5.788268  | 0.350156  | -0.201280 |

-----  
Statistical Thermodynamic Analysis  
Temperature= 298.150 Kelvin Pressure=  
1.00000 Atm

=====

```
SCF Energy= -1382.22522952 Predicted
Change= -4.238245D-08
Zero-point correction (ZPE)= -1381.9700
0.25515
Internal Energy (U)= -1381.9496
0.27554
Enthalpy (H)= -1381.9487
0.27649
Gibbs Free Energy (G)= -1382.0182
0.20702
```

-----  
Frequencies -- 37.1186 47.9118  
57.7289

**TS-26<sub>OH</sub>**

-----  
Using Gaussian 09: AM64L-G09RevD.01 24-  
Apr-2013

=====

```
#M062X/6-31G(d)
scf=(maxcycle=300,direct,tight) density=current
SCRFF=(PCM,SOLVENT=THF)
opt=(maxcycle=250,ts,calcfc,oeigentest)
freq=noraman
#N Geom=AllCheck Guess=TChech
SCRFF=Check GenChk RM062X/6-31G(d) Freq
```

-----  
Pointgroup= C1 Stoichiometry=  
C11H13BFNNa2O6 C1[X(C11H13BFNNa2O6)]  
#Atoms= 35  
Charge = 0 Multiplicity = 1

-----  
SCF Energy= -1382.20335026 Predicted  
Change= -5.502870D-09

```

=====
Optimization completed.      {Found  2
times}
Item  Max Val.  Criteria  Pass?  RMS Val.
Criteria  Pass?
Force  0.00002 || 0.00045 [YES]  0.00000
|| 0.00030 [YES]
Displ  0.00068 || 0.00180 [YES]  0.00068 ||
0.00180 [YES]
=====

```

```

-----
Atomic  Coordinates (Angstroms)
Type      X      Y      Z
-----
N      -0.777098  -1.300120  1.001365
C       0.181139  -2.073439  1.780939
C      -1.802897  -2.200589  0.445450
C      -2.903035  -1.442623  -0.321155
O      -3.796105  -0.882286  0.359661
O      -0.195387  -1.102883  -1.997350
B       0.090565  -0.086167  -1.112769
C       1.645200  -0.040715  -0.713195
O      -0.816539  0.862409  -0.741882
C      -1.147721  1.224841  1.123722
O      -2.105733  2.015217  1.038108
C      -1.328939  -0.175020  1.748268
C       2.342883  -1.258586  -0.630309
C       3.689816  -1.325743  -0.293373
C       4.364938  -0.137985  -0.047247
C       3.741359  1.094252  -0.134918
C       2.385435  1.125176  -0.467873
H       1.002146  -1.427311  2.106933
H       0.604912  -2.862561  1.153264
H      -0.276280  -2.543279  2.668066
H      -2.288893  -2.777008  1.250313
H      -1.295899  -2.891706  -0.233157
H      -2.401429  -0.295000  1.908973
H      -0.845382  -0.108279  2.730574
H       1.803933  -2.176825  -0.845957
H       4.222686  -2.268458  -0.223832
H       4.310603  1.999400  0.048732
H       1.911246  2.100491  -0.553362
O      -2.817984  -1.355318  -1.580774
Na     -3.125541  0.957341  -0.912266
H     -1.174352  -1.227393  -2.028961
O       0.070938  1.819224  1.397448
Na     -0.704174  3.128360  -0.534213
H       0.783252  1.169505  1.249721
F       5.670509  -0.187880  0.276747
=====

```

```

-----
Statistical Thermodynamic Analysis
Temperature= 298.150 Kelvin  Pressure=
1.00000 Atm
=====
SCF Energy= -1382.20335026  Predicted
Change= -5.502870D-09
Zero-point correction (ZPE)= -1381.9514
0.25194
Internal Energy (U)= -1381.9302
0.27314
=====

```

```

Enthalpy (H)= -1381.9292
0.27408
Gibbs Free Energy (G)= -1382.0002
0.20311
-----

```

```

Frequencies -- -237.3512 42.7925
54.6157
-----

```

## “open” 8

```

-----
Using Gaussian 09: AM64L-G09RevD.01 24-Apr-2013
=====
=====

```

```

#M062X/6-31G(d) scf=(maxcycle=300,direct,tight)
density=current

```

```

SCRF=(PCM,SOLVENT=THF) opt=(maxcycle=250)
freq=norman

```

```

#N Geom=AllCheck Guess=TCHECK SCRF=Check
GenChk RM062X/6-31G(d) Freq
-----
-----

```

```

Pointgroup= C1  Stoichiometry= C11H12BFNNaO5
C1[X(C11H12BFNNaO5)] #Atoms= 32

```

```

Charge = 0  Multiplicity = 1
-----
-----

```

```

SCF Energy= -1144.07301893  Predicted Change= -
4.207160D-08
=====
=====

```

```

Optimization completed.      {Found  2
times}

```

```

Item  Max Val.  Criteria  Pass?  RMS Val.
Criteria  Pass?
Force  0.00003 || 0.00045 [YES]  0.00000 ||
0.00030 [YES]

```

```

Displ  0.00169 || 0.00180 [YES]  0.00169 ||
0.00180 [YES]
-----
-----

```

```

Atomic  Coordinates (Angstroms)

```



| Type | X         | Y         | Z         |       | H                                  | 1.614168            | -1.987368 | -0.340616 |
|------|-----------|-----------|-----------|-------|------------------------------------|---------------------|-----------|-----------|
|      |           |           |           | ----- | H                                  | 1.880804            | -2.162487 | 1.398126  |
|      |           |           |           | ----  | H                                  | -3.369995           | 1.913868  | 1.178018  |
| N    | 3.489071  | -1.277763 | 0.411434  |       | H                                  | -5.689514           | 1.338638  | 0.437092  |
| C    | 4.233391  | -2.485234 | 0.750918  |       | H                                  | -4.240044           | -2.283562 | -1.322555 |
| C    | 3.855079  | -0.830109 | -0.937740 |       | H                                  | -1.917361           | -1.723048 | -0.582518 |
| C    | 3.213856  | 0.532566  | -1.221942 |       | O                                  | 3.906427            | 1.562742  | -1.036465 |
| O    | 1.986748  | 0.529749  | -1.530719 |       | Na                                 | 1.961067            | 2.582246  | -0.468139 |
| O    | -0.804365 | 1.684291  | 1.443547  |       | H                                  | 0.124989            | 1.729409  | 1.733605  |
| B    | -1.047487 | 0.505567  | 0.825492  |       | F                                  | -6.298505           | -0.799753 | -0.868305 |
| C    | -2.479729 | 0.136817  | 0.348368  |       | -----                              |                     |           |           |
| O    | -0.035850 | -0.446335 | 0.585852  |       | ----                               |                     |           |           |
| C    | 1.268393  | -0.251459 | 0.832822  |       |                                    |                     |           |           |
| O    | 1.709317  | 0.777222  | 1.313708  |       | Statistical Thermodynamic Analysis |                     |           |           |
| C    | 2.065352  | -1.502611 | 0.539983  |       | Temperature= 298.150 Kelvin        | Pressure= 1.00000   |           |           |
| C    | -3.553825 | 0.993878  | 0.630031  |       | Atm                                |                     |           |           |
| C    | -4.847842 | 0.688597  | 0.225053  |       | =====                              |                     |           |           |
| C    | -5.053009 | -0.493961 | -0.471732 |       | =====                              |                     |           |           |
| C    | -4.022994 | -1.373125 | -0.774882 |       | SCF Energy= -1144.07301893         | Predicted Change= - |           |           |
| C    | -2.737349 | -1.047065 | -0.357090 |       | 4.207160D-08                       |                     |           |           |
| H    | 4.001255  | -2.785335 | 1.776456  |       | Zero-point correction (ZPE)=       | -1143.8366          | 0.23632   |           |
| H    | 5.304275  | -2.276471 | 0.687437  |       | Internal Energy (U)=               | -1143.8173          | 0.25567   |           |
| H    | 4.004949  | -3.329223 | 0.076683  |       | Enthalpy (H)=                      | -1143.8163          | 0.25662   |           |
| H    | 3.526910  | -1.562303 | -1.697630 |       | Gibbs Free Energy (G)=             | -1143.8865          | 0.18647   |           |
| H    | 4.942169  | -0.733647 | -0.977455 |       | -----                              |                     |           |           |
|      |           |           |           |       | ----                               |                     |           |           |
|      |           |           |           |       | Frequencies --                     | 24.4516             | 36.8636   |           |
|      |           |           |           |       | 47.3497                            |                     |           |           |

5. NaOH Mediated Hydrolysis:  $S_N2$ -B-Attack-First Pathway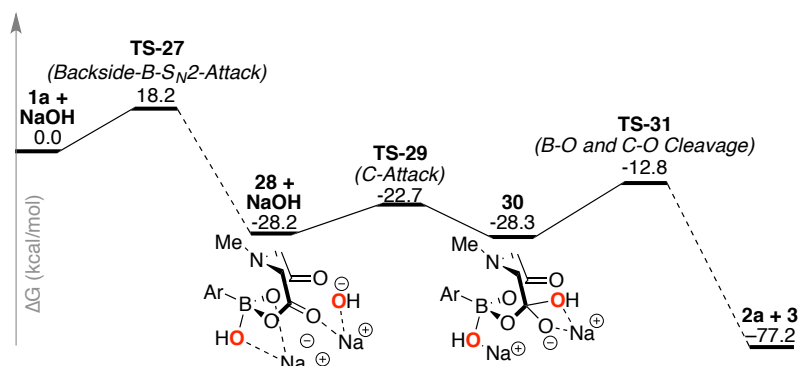

**Figure 36.** B-attack-first pathway for the NaOH mediated hydrolysis of MIDA boronate **1a**.

## Geometries, Energies, and Thermal Corrections

## TS-27

Using Gaussian 09: AM64L-G09RevD.01 24-Apr-2013

```
#M062X/6-31G(d) scf=(maxcycle=300,direct,tight)
density=current
SCRFF=(PCM,SOLVENT=THF)
opt=(maxcycle=250,ts,calcfc,noeigentest,gdiis)
iop(1/8=18) freq=noraman
#N Geom=AllCheck Guess=TCheck SCRFF=Check
Test GenChk RM062X/6-31G(d) Freq
```

```
Pointgroup= C1 Stoichiometry= C11H12BFNNaO5
C1[X(C11H12BFNNaO5)] #Atoms= 32
Charge = 0 Multiplicity = 1
```

```
SCF Energy= -1144.01906162 Predicted
Change= -9.992108D-09
```

```
Optimization completed. {Found 2
times}
```

| Item     | Max Val.      | Criteria      | Pass? | RMS Val. |
|----------|---------------|---------------|-------|----------|
| Criteria | Pass?         |               |       |          |
| Force    | 0.00001       | 0.00045 [YES] |       | 0.00000  |
|          | 0.00030 [YES] |               |       |          |

```
Displ 0.00098 || 0.00180 [YES] 0.00098 ||
0.00180 [YES]
```

| Atomic Type | Coordinates (Angstroms) |           |           |
|-------------|-------------------------|-----------|-----------|
|             | X                       | Y         | Z         |
| N           | 1.636791                | -0.149394 | -1.207398 |
| C           | 0.975803                | -0.971179 | -2.233135 |
| C           | 2.886828                | -0.771550 | -0.751023 |
| C           | 2.518275                | -1.614060 | 0.464232  |
| O           | 3.186397                | -2.527138 | 0.880778  |
| O           | 1.382445                | -1.211637 | 1.013081  |
| B           | 0.740851                | -0.026700 | 0.476443  |
| C           | -0.779308               | -0.109381 | 0.042644  |
| O           | 1.341919                | 1.284351  | 0.754750  |
| C           | 1.802003                | 2.017592  | -0.248153 |
| O           | 2.179181                | 3.157480  | -0.132967 |
| C           | 1.781586                | 1.257731  | -1.569874 |
| C           | -1.462813               | -1.334274 | 0.055516  |
| C           | -2.795617               | -1.437185 | -0.338511 |
| C           | -3.450407               | -0.289231 | -0.762562 |
| C           | -2.819573               | 0.945133  | -0.801569 |
| C           | -1.484187               | 1.020027  | -0.399587 |
| H           | 0.004948                | -0.535181 | -2.472478 |
| H           | 0.818316                | -1.976257 | -1.832811 |
| H           | 1.593238                | -1.030378 | -3.135153 |
| H           | 3.599075                | -0.004111 | -0.430974 |
| H           | 3.361556                | -1.382827 | -1.522507 |
| H           | 2.676687                | 1.472715  | -2.160139 |
| H           | 0.901924                | 1.573774  | -2.139948 |
| H           | -0.941314               | -2.225711 | 0.395038  |
| H           | -3.327620               | -2.382892 | -0.325496 |

|                                                 |           |           |           |                                               |                         |           |           |        |         |  |
|-------------------------------------------------|-----------|-----------|-----------|-----------------------------------------------|-------------------------|-----------|-----------|--------|---------|--|
| H                                               | -3.367213 | 1.818399  | -1.140794 | Displ                                         | 0.00309                 |           | 0.00180   | [ NO ] | 0.00309 |  |
| H                                               | -0.996107 | 1.993186  | -0.411488 |                                               | 0.00180                 | [ YES ]   |           |        |         |  |
| O                                               | -0.127992 | 0.246514  | 2.651729  | -----                                         |                         |           |           |        |         |  |
| H                                               | 0.435844  | 1.010606  | 2.828607  | -----                                         |                         |           |           |        |         |  |
| Na                                              | -2.182597 | 0.578467  | 2.420748  | Atomic                                        | Coordinates (Angstroms) |           |           |        |         |  |
| F                                               | -4.738190 | -0.377055 | -1.144149 | Type                                          | X                       | Y         | Z         |        |         |  |
| -----                                           |           |           |           | -----                                         |                         |           |           |        |         |  |
| Statistical Thermodynamic Analysis              |           |           |           | N                                             | 0.175784                | -0.593741 | 1.611408  |        |         |  |
| Temperature= 298.150 Kelvin Pressure= 1.00000   |           |           |           | C                                             | -0.905114               | -0.587158 | 2.569801  |        |         |  |
| Atm                                             |           |           |           | C                                             | 1.308630                | 0.238037  | 1.937411  |        |         |  |
| =====                                           |           |           |           | C                                             | 1.218330                | 1.591796  | 1.264605  |        |         |  |
| =====                                           |           |           |           | O                                             | 1.652342                | 2.611661  | 1.764907  |        |         |  |
| SCF Energy= -1144.01906162 Predicted            |           |           |           | O                                             | 0.705805                | 1.629007  | 0.040074  |        |         |  |
| Change= -9.992108D-09                           |           |           |           | B                                             | 0.148146                | 0.595737  | -0.903047 |        |         |  |
| Zero-point correction (ZPE)= -1143.7849         |           |           |           | C                                             | -1.392991               | 0.218780  | -0.632213 |        |         |  |
| 0.23413                                         |           |           |           | O                                             | 1.046747                | -0.616178 | -1.019145 |        |         |  |
| Internal Energy (U)= -1143.7661                 |           |           |           | C                                             | 1.177308                | -1.714302 | -0.329261 |        |         |  |
| 0.25291                                         |           |           |           | O                                             | 1.848662                | -2.649802 | -0.758805 |        |         |  |
| Enthalpy (H)= -1143.7652                        |           |           |           | C                                             | 0.482398                | -1.860090 | 1.019636  |        |         |  |
| 0.25385                                         |           |           |           | C                                             | -2.246958               | 1.097224  | 0.050542  |        |         |  |
| Gibbs Free Energy (G)= -1143.8319               |           |           |           | C                                             | -3.592747               | 0.808320  | 0.262216  |        |         |  |
| 0.18709                                         |           |           |           | C                                             | -4.094698               | -0.388552 | -0.227860 |        |         |  |
| -----                                           |           |           |           | C                                             | -3.301177               | -1.288881 | -0.918284 |        |         |  |
| -----                                           |           |           |           | C                                             | -1.957275               | -0.968158 | -1.117596 |        |         |  |
| Frequencies -- -340.7085 50.6350                |           |           |           | H                                             | -1.792392               | -1.045322 | 2.118638  |        |         |  |
| 53.0778                                         |           |           |           | H                                             | -1.159623               | 0.448273  | 2.819234  |        |         |  |
| <b>28 + NaOH</b>                                |           |           |           | H                                             | -0.662626               | -1.119070 | 3.505650  |        |         |  |
| -----                                           |           |           |           | H                                             | 2.253320                | -0.176548 | 1.528627  |        |         |  |
| -----                                           |           |           |           | H                                             | 1.437537                | 0.395943  | 3.015903  |        |         |  |
| Using Gaussian 09: AM64L-G09RevD.01 24-Apr-2013 |           |           |           | H                                             | 1.119518                | -2.519048 | 1.632978  |        |         |  |
| =====                                           |           |           |           | H                                             | -0.454840               | -2.399380 | 0.829536  |        |         |  |
| =====                                           |           |           |           | H                                             | -1.844114               | 2.027019  | 0.447395  |        |         |  |
| #M062X/6-31G(d) scf=(maxcycle=300,direct,tight) |           |           |           | H                                             | -4.250477               | 1.484599  | 0.799002  |        |         |  |
| density=current                                 |           |           |           | H                                             | -3.734008               | -2.212111 | -1.289643 |        |         |  |
| SCRF=(PCM,SOLVENT=THF) opt=(maxcycle=250)       |           |           |           | H                                             | -1.335207               | -1.674514 | -1.666109 |        |         |  |
| freq=norman                                     |           |           |           | O                                             | 0.330969                | 1.316241  | -2.170566 |        |         |  |
| #N Geom=AllCheck Guess=TCHECK SCRF=Check        |           |           |           | H                                             | -0.215431               | 0.931318  | -2.866086 |        |         |  |
| GenChk RM062X/6-31G(d) Freq                     |           |           |           | Na                                            | 1.305565                | 3.210091  | -1.460914 |        |         |  |
| -----                                           |           |           |           | O                                             | 3.810657                | -0.160957 | 0.214249  |        |         |  |
| -----                                           |           |           |           | Na                                            | 4.038157                | -2.024296 | -0.798648 |        |         |  |
| Pointgroup= C1 Stoichiometry= C11H13BFNNa2O6    |           |           |           | H                                             | 3.123638                | 0.207956  | -0.360970 |        |         |  |
| C1[X(C11H13BFNNa2O6)] #Atoms= 35                |           |           |           | F                                             | -5.397018               | -0.681915 | -0.029254 |        |         |  |
| Charge = 0 Multiplicity = 1                     |           |           |           | -----                                         |                         |           |           |        |         |  |
| -----                                           |           |           |           | Statistical Thermodynamic Analysis            |                         |           |           |        |         |  |
| -----                                           |           |           |           | Temperature= 298.150 Kelvin Pressure= 1.00000 |                         |           |           |        |         |  |
| -----                                           |           |           |           | Atm                                           |                         |           |           |        |         |  |
| -----                                           |           |           |           | =====                                         |                         |           |           |        |         |  |
| -----                                           |           |           |           | =====                                         |                         |           |           |        |         |  |
| SCF Energy= -1382.19364753 Predicted            |           |           |           | SCF Energy= -1382.19364753 Predicted          |                         |           |           |        |         |  |
| Change= -1.235537D-07                           |           |           |           | Change= -1.235537D-07                         |                         |           |           |        |         |  |
| -----                                           |           |           |           | -----                                         |                         |           |           |        |         |  |
| -----                                           |           |           |           | -----                                         |                         |           |           |        |         |  |
| Optimization completed. {Found 1                |           |           |           | Zero-point correction (ZPE)= -1381.9445       |                         |           |           |        |         |  |
| times}                                          |           |           |           | 0.24910                                       |                         |           |           |        |         |  |
| Item Max Val. Criteria Pass? RMS Val.           |           |           |           | Internal Energy (U)= -1381.9215               |                         |           |           |        |         |  |
| Criteria Pass?                                  |           |           |           | 0.27207                                       |                         |           |           |        |         |  |
| Force 0.00001    0.00045 [ YES ] 0.00000        |           |           |           | Enthalpy (H)= -1381.9206                      |                         |           |           |        |         |  |
| 0.00030 [ YES ]                                 |           |           |           | 0.27301                                       |                         |           |           |        |         |  |
|                                                 |           |           |           | Gibbs Free Energy (G)= -1381.9975             |                         |           |           |        |         |  |
|                                                 |           |           |           | 0.19606                                       |                         |           |           |        |         |  |

-----  
 -----  
 Frequencies -- 25.2546 35.7610  
 47.0861

**TS-29**

-----  
 Using Gaussian 09: AM64L-G09RevD.01 24-Apr-2013  
 =====

=====

```
#M062X/6-31G(d) scf=(maxcycle=300,direct,tight)
density=current
SCRF=(PCM,SOLVENT=THF)
opt=(maxcycle=250,ts,calcfc,noeigentest)
freq=norman
#N Geom=AllCheck Guess=TCheck SCRF=Check
GenChk RM062X/6-31G(d) Freq
```

-----

-----  
 Pointgroup= C1 Stoichiometry= C11H13BFNNa2O6  
 C1[X(C11H13BFNNa2O6)] #Atoms= 35  
 Charge = 0 Multiplicity = 1

-----

-----  
 SCF Energy= -1382.18762251 Predicted  
 Change= -2.004827D-09

=====

-----  
 Optimization completed. {Found 2  
 times}  
 Item Max Val. Criteria Pass? RMS Val.  
 Criteria Pass?  
 Force 0.00000 || 0.00045 [ YES ] 0.00000 ||  
 0.00030 [ YES ]  
 Displ 0.00089 || 0.00180 [ YES ] 0.00089 ||  
 0.00180 [ YES ]

-----

-----  
 Atomic Coordinates (Angstroms)  
 Type X Y Z

-----

|   |           |           |           |
|---|-----------|-----------|-----------|
| N | 0.192398  | -0.924187 | 1.360300  |
| C | -0.916132 | -1.517535 | 2.082450  |
| C | 0.965974  | 0.018813  | 2.126319  |
| C | 1.296236  | 1.307393  | 1.393900  |
| O | 1.936487  | 2.185008  | 1.949434  |
| O | 0.757777  | 1.550579  | 0.212093  |
| B | 0.104522  | 0.750121  | -0.890148 |
| C | -1.416411 | 0.303172  | -0.586587 |
| O | 0.963849  | -0.352910 | -1.378730 |
| C | 1.526031  | -1.366672 | -0.744601 |
| O | 2.209225  | -2.176635 | -1.399621 |
| C | 0.939516  | -1.868043 | 0.570925  |
| C | -2.245459 | 1.056087  | 0.257087  |
| C | -3.575206 | 0.712997  | 0.492041  |
| C | -4.087359 | -0.407783 | -0.144252 |

|    |           |           |           |
|----|-----------|-----------|-----------|
| C  | -3.318191 | -1.183537 | -0.995420 |
| C  | -1.988360 | -0.814964 | -1.206986 |
| H  | -1.567705 | -2.042399 | 1.375922  |
| H  | -1.509757 | -0.725552 | 2.548545  |
| H  | -0.602250 | -2.228814 | 2.866722  |
| H  | 1.920029  | -0.385066 | 2.488057  |
| H  | 0.382704  | 0.327252  | 3.002352  |
| H  | 1.761998  | -2.347568 | 1.127494  |
| H  | 0.246755  | -2.664133 | 0.266605  |
| H  | -1.833560 | 1.927541  | 0.764019  |
| H  | -4.213707 | 1.293015  | 1.151102  |
| H  | -3.759984 | -2.052145 | -1.473665 |
| H  | -1.374343 | -1.426881 | -1.865448 |
| O  | 0.131847  | 1.783382  | -1.953681 |
| H  | -0.510848 | 1.570426  | -2.640318 |
| Na | 1.119955  | 3.478237  | -0.873004 |
| O  | 3.066559  | -0.220867 | 0.260892  |
| Na | 4.238052  | -1.828329 | -0.573965 |
| H  | 3.037346  | 0.492854  | -0.392602 |
| F  | -5.377104 | -0.750758 | 0.070463  |

-----

-----  
 Statistical Thermodynamic Analysis  
 Temperature= 298.150 Kelvin Pressure= 1.00000  
 Atm

=====

=====

```
SCF Energy= -1382.18762251 Predicted
Change= -2.004827D-09
Zero-point correction (ZPE)= -1381.9382
0.24932
Internal Energy (U)= -1381.9164
0.27116
Enthalpy (H)= -1381.9155
0.27211
Gibbs Free Energy (G)= -1381.9887
0.19887
```

-----

-----  
 Frequencies -- -213.8591 38.2388  
 44.7383

**30**

-----  
 Using Gaussian 09: AM64L-G09RevD.01 24-Apr-2013  
 =====

=====

```
#M062X/6-31G(d) scf=(maxcycle=300,direct,tight)
density=current
SCRF=(PCM,SOLVENT=THF) opt=(maxcycle=250)
freq=norman
#N Geom=AllCheck Guess=TCheck SCRF=Check
GenChk RM062X/6-31G(d) Freq
```

-----

-----  
 Pointgroup= C1 Stoichiometry= C11H13BFNNa2O6  
 C1[X(C11H13BFNNa2O6)] #Atoms= 35

```

Charge = 0      Multiplicity = 1
-----
SCF Energy= -1382.19802001      Predicted
Change= -7.603513D-08
-----
Optimization completed.      {Found 1
times}
Item  Max Val.  Criteria  Pass?  RMS Val.
Criteria  Pass?
Force  0.00002 || 0.00045 [ YES ]  0.00000 ||
0.00030 [ YES ]
Displ  0.00309 || 0.00180 [ NO ]  0.00309 ||
0.00180 [ YES ]
-----
Atomic      Coordinates (Angstroms)
Type        X          Y          Z
-----
N      0.165767  -0.894833  1.379551
C      -0.901303  -1.553405  2.102606
C      0.915041  0.053120  2.156866
C      1.251737  1.347827  1.429256
O      1.941905  2.192598  1.980699
O      0.723277  1.597330  0.252702
B      0.112868  0.762825  -0.901756
C      -1.406482  0.294143  -0.600432
O      1.008405  -0.278652  -1.358630
C      1.750060  -1.192753  -0.595554
O      2.319823  -2.116314  -1.322834
C      0.940598  -1.805725  0.566283
C      -2.269146  1.026908  0.227282
C      -3.590569  0.644533  0.450045
C      -4.061115  -0.494665  -0.185656
C      -3.258722  -1.251344  -1.023387
C      -1.937750  -0.844226  -1.220591
H      -1.548326  -2.074154  1.388303
H      -1.512293  -0.806377  2.619004
H      -0.542111  -2.287554  2.847085
H      1.863605  -0.343276  2.551684
H      0.316436  0.361477  3.022528
H      1.645560  -2.407339  1.174866
H      0.240464  -2.502068  0.092839
H      -1.890276  1.912776  0.735645
H      -4.254011  1.207702  1.099283
H      -3.668719  -2.136190  -1.500583
H      -1.290942  -1.438785  -1.862995
O      0.100147  1.833060  -1.942630
H      -0.668746  1.718712  -2.512652
Na     1.007249  3.540514  -0.828124
O      2.816004  -0.344640  0.091538
Na     4.348848  -1.879130  -0.618856
H      2.888043  0.431178  -0.486976
F      -5.343449  -0.875017  0.017068
-----
Statistical Thermodynamic Analysis

Temperature= 298.150 Kelvin      Pressure= 1.00000
Atm
-----
SCF Energy= -1382.19802001      Predicted
Change= -7.603513D-08
Zero-point correction (ZPE)=      -1381.9469
0.25103
Internal Energy (U)=      -1381.9252
0.27276
Enthalpy (H)=      -1381.9243
0.27370
Gibbs Free Energy (G)=      -1381.9976
0.20037
-----
Frequencies --      31.8788      42.1727
56.4629

TS-31
-----
Using Gaussian 09: AM64L-G09RevD.01 24-Apr-
2013
-----
#M062X/6-31G(d) scf=(maxcycle=300,direct,tight)
density=current
SCRF=(PCM,SOLVENT=THF)
opt=(maxcycle=250,ts,calcfc,noeigentest,gdiis)
iop(1/8=18) freq=norman
#N Geom=AllCheck Guess=TCheck SCRF=Check
Test GenChk RM062X/6-31G(d) Freq
-----
Pointgroup= C1      Stoichiometry= C11H13BFNNa2O6
C1[X(C11H13BFNNa2O6)] #Atoms= 35
Charge = 0      Multiplicity = 1
-----
SCF Energy= -1382.17033238      Predicted
Change= -1.586759D-09
-----
Optimization completed on the basis of negligible
forces.      {Found 2 times}
Item  Max Val.  Criteria  Pass?  RMS Val.
Criteria  Pass?
Force  0.00000 || 0.00045 [ YES ]  0.00000 ||
0.00030 [ YES ]
Displ  0.00206 || 0.00180 [ NO ]  0.00206 ||
0.00180 [ YES ]
-----
Atomic      Coordinates (Angstroms)
Type        X          Y          Z
-----
N      0.784621  -1.733037  -0.386128

```

|    |           |           |           |
|----|-----------|-----------|-----------|
| C  | -0.202323 | -2.454281 | -1.162371 |
| C  | 0.916202  | -2.219867 | 0.970893  |
| C  | 0.513997  | -1.182481 | 2.028534  |
| O  | 0.029315  | -1.559797 | 3.087239  |
| O  | 0.803783  | 0.067053  | 1.771069  |
| B  | 0.392827  | 1.067711  | 0.412746  |
| C  | -1.074432 | 0.524859  | -0.061242 |
| O  | 1.428809  | 1.120097  | -0.479211 |
| C  | 2.913249  | -0.344065 | -0.622256 |
| O  | 3.725166  | 0.120962  | -1.431943 |
| C  | 2.000462  | -1.467441 | -1.110937 |
| C  | -2.056863 | 0.019703  | 0.807371  |
| C  | -3.322885 | -0.379150 | 0.361319  |
| C  | -3.608167 | -0.264307 | -0.987993 |
| C  | -2.678654 | 0.227955  | -1.894393 |
| C  | -1.428984 | 0.615658  | -1.417069 |
| H  | -0.358539 | -1.946178 | -2.118400 |
| H  | -1.158962 | -2.446081 | -0.628205 |
| H  | 0.078163  | -3.504111 | -1.365078 |
| H  | 1.955833  | -2.508241 | 1.190605  |
| H  | 0.303250  | -3.111864 | 1.135621  |
| H  | 2.663562  | -2.357335 | -1.161953 |
| H  | 1.737922  | -1.204471 | -2.137485 |
| H  | -1.826810 | -0.096868 | 1.866300  |
| H  | -4.071365 | -0.780603 | 1.037542  |
| H  | -2.941973 | 0.290735  | -2.945991 |
| H  | -0.681791 | 0.979736  | -2.118998 |
| O  | 0.144033  | 2.345367  | 1.142690  |
| H  | 1.005924  | 2.765194  | 1.265747  |
| Na | -1.959219 | 2.715372  | 1.503968  |
| O  | 3.226633  | -0.297126 | 0.692365  |
| Na | 2.885287  | 2.176030  | -1.627942 |
| H  | 2.382201  | -0.149446 | 1.189215  |
| F  | -4.824684 | -0.641681 | -1.437204 |

-----  
Statistical Thermodynamic Analysis  
Temperature= 298.150 Kelvin    Pressure= 1.00000  
Atm

=====  
SCF Energy= -1382.17033238    Predicted  
Change= -1.586759D-09  
Zero-point correction (ZPE)= -1381.9211  
0.24915  
Internal Energy (U)= -1381.8991  
0.27120  
Enthalpy (H)= -1381.8981  
0.27215  
Gibbs Free Energy (G)= -1381.9730  
0.19727  
-----

-----  
Frequencies -- -240.0036    21.2685  
36.3338

6. NaOH Mediated Hydrolysis: Computed  $^{12}\text{C}/^{13}\text{C}$  Kinetic Isotope Effects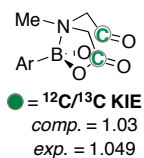

**Figure 37.** Computations predict a  $^{12}\text{C}/^{13}\text{C}$  KIE of 1.03, consistent with experiments.

We applied the Bigeleisen-Mayer approach (J. Bigeleisen, M. G. Mayer J. Chem. Phys. 1947, 15, 261–267) to obtain the kinetic isotope effect (KIE) data. All KIE computations were performed using M06-2X/6-31G\*/PCM(THF) level of theory.

**Parameters**

Temperature: 21 °C (294.15 K)

Scaling factor: 1.0

Vibrational Frequencies:

| C-Attack TS-5 | C-Attack $^{13}\text{C}$ -TS-5 | 1 + NaOH | $^{13}\text{C}$ -1+ NaOH |
|---------------|--------------------------------|----------|--------------------------|
| -236.2815     | -233.4227                      | 46.0313  | 46.0072                  |
| 24.5821       | 24.5642                        | 52.0689  | 51.9741                  |
| 39.3362       | 39.3119                        | 62.4743  | 62.3734                  |
| 54.2161       | 54.2035                        | 69.7919  | 69.6349                  |
| 62.8129       | 62.6222                        | 78.2478  | 78.1812                  |
| 73.5524       | 73.412                         | 110.6719 | 110.6397                 |
| 136.9329      | 136.757                        | 125.6703 | 125.5995                 |
| 140.6368      | 140.4666                       | 137.1435 | 136.7917                 |
| 176.4308      | 176.369                        | 164.275  | 164.1538                 |
| 188.4414      | 188.2455                       | 179.509  | 179.3528                 |
| 204.4681      | 204.3826                       | 192.3916 | 192.2027                 |
| 244.8146      | 244.1167                       | 220.3954 | 219.8707                 |
| 266.1172      | 265.4988                       | 250.1033 | 249.6569                 |
| 284.9123      | 284.7578                       | 292.6641 | 292.2001                 |
| 290.191       | 289.8271                       | 305.305  | 305.1986                 |
| 317.7938      | 317.6983                       | 339.8457 | 339.6324                 |
| 341.245       | 341.0723                       | 368.9496 | 368.9033                 |
| 369.1036      | 368.6136                       | 376.8069 | 376.3903                 |
| 375.3622      | 374.878                        | 389.9179 | 389.1296                 |
| 378.2488      | 377.3336                       | 393.8447 | 393.1543                 |
| 407.6959      | 407.293                        | 395.6159 | 395.4036                 |

|           |           |           |           |
|-----------|-----------|-----------|-----------|
| 424.5171  | 424.4507  | 411.6268  | 411.4489  |
| 427.4239  | 427.1237  | 432.9892  | 432.5002  |
| 460.9661  | 460.8179  | 436.5717  | 436.5439  |
| 471.8892  | 468.9531  | 462.4012  | 459.4184  |
| 511.2214  | 508.854   | 477.4025  | 477.42    |
| 533.0565  | 530.8001  | 511.1893  | 507.4033  |
| 539.6172  | 536.8582  | 540.1182  | 535.3734  |
| 550.2227  | 542.9296  | 549.864   | 546.0218  |
| 563.4949  | 561.5727  | 578.5602  | 570.638   |
| 581.245   | 580.2145  | 580.0577  | 579.3421  |
| 602.2856  | 600.951   | 609.696   | 608.388   |
| 636.7121  | 633.922   | 635.2819  | 632.8203  |
| 646.3148  | 645.1884  | 644.9637  | 643.2617  |
| 652.0448  | 650.3465  | 656.2308  | 654.7284  |
| 723.3531  | 720.5702  | 724.9646  | 722.1919  |
| 745.3663  | 745.1401  | 746.8928  | 746.703   |
| 829.8438  | 829.6776  | 829.5501  | 829.4103  |
| 852.3675  | 852.3039  | 851.5897  | 851.5781  |
| 858.3078  | 858.2757  | 877.7556  | 877.6576  |
| 889.9998  | 888.9005  | 894.5628  | 893.908   |
| 915.59    | 912.755   | 924.729   | 922.0938  |
| 929.6899  | 927.8142  | 940.7957  | 938.8474  |
| 939.6656  | 937.2468  | 950.4336  | 947.365   |
| 979.7059  | 977.4521  | 992.2639  | 985.2711  |
| 981.5958  | 979.739   | 994.2243  | 993.9932  |
| 1006.2815 | 1005.9807 | 1020.2727 | 1014.4708 |
| 1018.5699 | 1013.4333 | 1037.8988 | 1037.0277 |
| 1031.1984 | 1029.6307 | 1059.1696 | 1057.5946 |
| 1045.3459 | 1044.3699 | 1075.7029 | 1075.4555 |
| 1063.4978 | 1062.8418 | 1078.4139 | 1077.5033 |
| 1099.8506 | 1099.2239 | 1095.8298 | 1094.8293 |



---

|           |           |           |           |
|-----------|-----------|-----------|-----------|
| 1124.3011 | 1123.4935 | 1127.1353 | 1126.821  |
| 1132.6447 | 1130.6297 | 1136.8209 | 1133.1293 |
| 1187.4202 | 1187.0309 | 1196.1071 | 1195.4666 |
| 1189.5865 | 1188.638  | 1199.5189 | 1198.8586 |
| 1244.3514 | 1243.4593 | 1245.0178 | 1244.0502 |
| 1263.8933 | 1261.8127 | 1273.2248 | 1272.6856 |
| 1290.9155 | 1266.475  | 1300.7049 | 1290.0966 |
| 1295.2524 | 1292.2837 | 1302.0524 | 1301.9788 |
| 1302.3635 | 1302.2049 | 1317.1688 | 1302.7972 |
| 1322.2899 | 1321.8566 | 1329.0395 | 1328.0743 |
| 1325.9706 | 1323.2393 | 1338.2574 | 1336.3468 |
| 1342.2058 | 1325.1824 | 1344.8774 | 1342.7824 |
| 1347.5513 | 1340.7355 | 1358.3414 | 1348.9751 |
| 1379.3756 | 1375.9926 | 1383.3957 | 1377.122  |
| 1392.367  | 1384.2679 | 1411.4529 | 1389.0623 |
| 1452.0354 | 1451.9495 | 1457.1392 | 1457.0301 |
| 1456.2369 | 1456.1701 | 1472.2249 | 1471.8247 |
| 1488.3837 | 1488.3154 | 1487.2686 | 1487.1544 |
| 1499.4678 | 1499.3603 | 1511.1149 | 1510.923  |
| 1512.0188 | 1511.9714 | 1525.195  | 1525.172  |
| 1553.0156 | 1553.0187 | 1560.2043 | 1560.1962 |
| 1576.6592 | 1576.6549 | 1579.0048 | 1579.003  |
| 1678.1582 | 1678.0428 | 1677.1611 | 1677.1291 |
| 1700.3404 | 1700.264  | 1700.7283 | 1700.7183 |
| 1766.9495 | 1721.2716 | 1840.2917 | 1792.779  |
| 1892.6306 | 1844.5136 | 1899.1675 | 1850.9884 |
| 3080.3635 | 3080.3519 | 3066.2654 | 3066.2758 |
| 3121.1828 | 3121.2282 | 3126.7448 | 3126.7332 |
| 3123.3885 | 3123.4252 | 3132.5223 | 3132.5088 |
| 3178.1304 | 3178.1161 | 3166.5267 | 3166.5213 |
| 3188.6223 | 3188.6133 | 3177.1021 | 3177.137  |

---

|           |           |           |           |
|-----------|-----------|-----------|-----------|
| 3191.6581 | 3191.6736 | 3194.6824 | 3194.7017 |
| 3203.9532 | 3203.9437 | 3208.8507 | 3208.8522 |
| 3210.0431 | 3210.083  | 3211.0493 | 3211.0594 |
| 3214.3625 | 3214.3911 | 3219.9826 | 3219.9827 |
| 3238.3163 | 3238.3352 | 3237.4369 | 3237.4301 |
| 3239.6934 | 3239.69   | 3249.4984 | 3249.4238 |
| 3833.2154 | 3833.2162 | 3809.9344 | 3809.8342 |

## **7. Computational exploration of the H<sub>2</sub>O-mediated slow-release mechanism.**

Several levels of theory have been used to study the slow-release reaction. For different experimental data, different concentrations and temperatures are relevant. The level of theory that provided best quantitative agreement between predicted and observed kinetic isotope effects was M06L/6-311+G\*\* with solvation in both THF and water computed as a single point using the default PCM settings in Gaussian09 combined with the same level of theory (M06L/6-311+G\*\*). This is the preferred level of theory, but has been reserved for calculations that probe quantitative aspects of the reaction. The computationally cheaper M06-2X/6-31+G\* (incorporating solvation in THF using PCM) level was used to investigate the full reaction profile. A range of conformations have been considered in all relevant cases although in the later stages of the hydrolysis, after the initial ring opening and rate-limiting step, few conformations were considered. Unless otherwise stated, calculations were performed in Gaussian09.<sup>7</sup>

Throughout the text, the levels of theory are:

Level 1A – M06-2X/6-31+G\* incorporating PCM solvation for THF in geometry optimization and in vibrational corrections. Thermodynamics for P = 1 atm and T = 298 K.

Level 1B – as 1A but thermodynamics are at P = 24.15 atm (1 M) and T = 294 K.

Level 2A - M06L/6-311+G\*\* for geometry optimization and vibrational corrections. Solvation in THF is added as a single point. Solvation in water is included in parentheses. Thermodynamics for P = 1 atm and T = 298 K.

Level 2B – as 2A but thermodynamics are at P = 24.15 atm (1 M) and T = 294 K.

Level 2C – as 2A but thermodynamics are at P = 24.15 atm (1 M) and T = 294 K for all species except water which is at P = 217.35 (9 M) and T = 294K.

Level 3 – M06/6-311+G\*\*//B3LYP/6-31+G\*\* including solvation as a single point using PCM combined with B3LYP/6-31+G\* with settings for THF (this single point is computed in Gaussian03).<sup>8</sup> This level of theory had been found previously to agree well with energies obtained using MP2.<sup>9</sup>

A number of mechanistic possibilities were considered. The detailed studies of the mechanism that we consider to be in best agreement with experimental observation are presented first.

### 8. S<sub>N</sub>2 attack at the “front” side of B (*syn* to N)

The presence of a boron and nitrogen kinetic isotope effects suggested the involvement of both in the key rate-limiting step. A simple possibility would be that as the B-N bond stretches, a water molecule could intrude into the bond; the oxygen lone pair of water would complement the Lewis acidic boron while the OH group would be able to form a hydrogen bond with the nascent amine. These interactions stabilize transition state **TS-12**, and hence it is significantly lower in energy than the ring-opened intermediate in the S<sub>N</sub>1 mechanism, **32**, discussed below. Computations at most levels of theory suggest that this mechanism has the lowest barrier of the various mechanisms considered (Tables 20, 21 and 22). Hence the full reaction profile was explored, linking from reactants to products. The rate-limiting barrier involves **TS-12** and leads to the zwitterionic intermediate **13**.

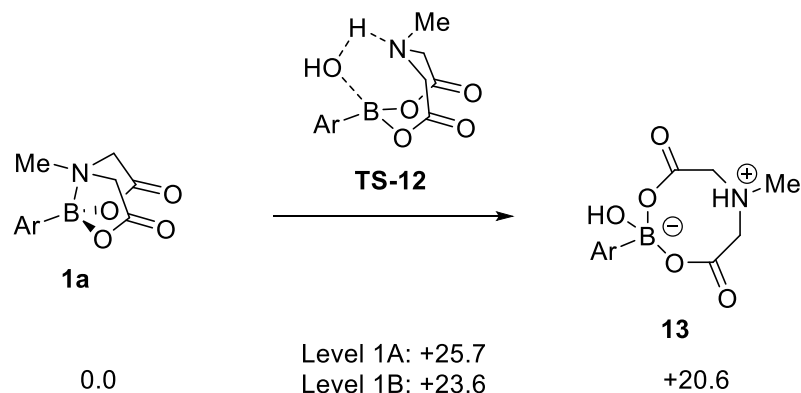

**Figure 38.** The rate-limiting barrier, with free energies in kcal/mol relative to initial reactants computed at Level 1 (A and B).

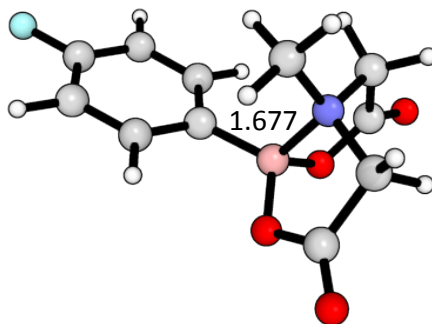

**Figure 39.** The structure of **1a** optimized at Level 1. Distances are shown in Å.

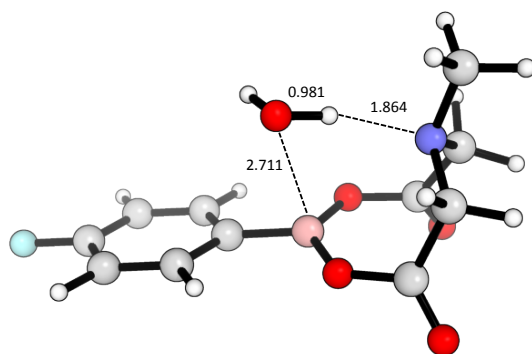

**Figure 40.** The structure of **TS-12** optimized at Level 1. Distances are shown in Å.

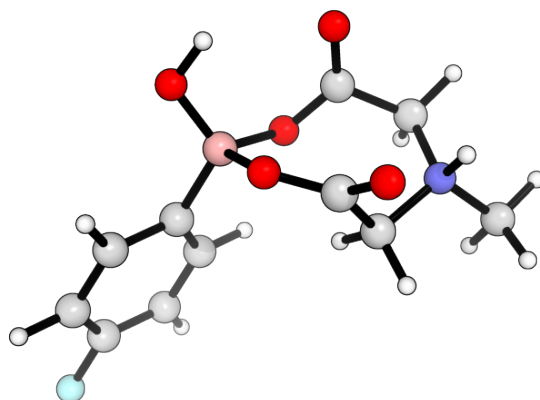

**Figure 41.** The structure of the lowest energy conformation of **13** optimized at Level 1.

The zwitterion **13** can undergo cleavage of a B-OCO bond via **TS-14**; at 1 M concentration of reagents (Level 1B), the free energy of **TS-14** is significantly below **TS-12**. The protonated amine stabilizes the forming carboxylate in this bond breaking step. Subsequent to bond cleavage, proton transfer leaves the deprotonated amine able to reform the B-N bond in the lowest energy conformation of **15**. The B-N bond in **15** is longer than in the reactant **1a** which suggests that any geometric strain in the bicyclic structure of **1a** is offset by the extra electron-withdrawing acyl group attached to the boron which makes that atom more Lewis-acidic. A second water molecule is then able to attack, via **TS-16** which leads to the water complex **TS-17**.

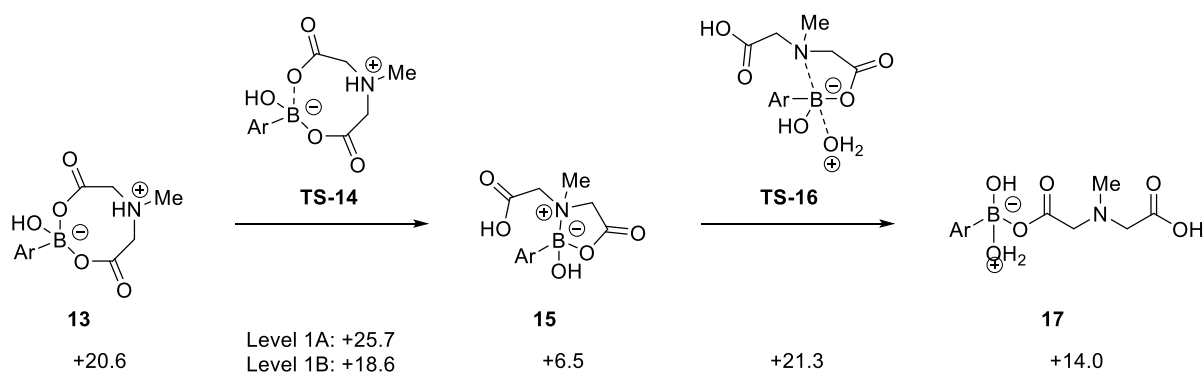

**Figure 42.** The steps linking the product of the first water addition (**13**) with the product of the second water addition (**17**). Free energies in kcal/mol relative to initial reactants computed at Level 1 are shown.

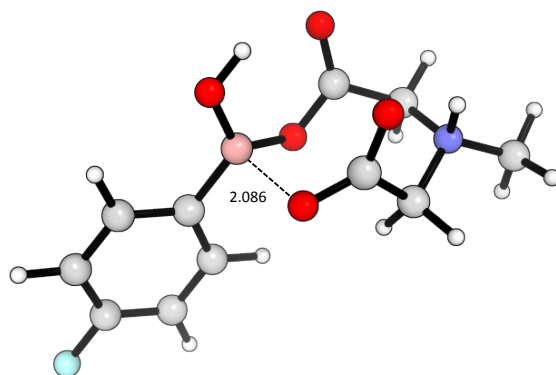

**Figure 43.** The lowest energy conformation structure of **TS-14** optimized at Level 1. Distances are shown in Å.

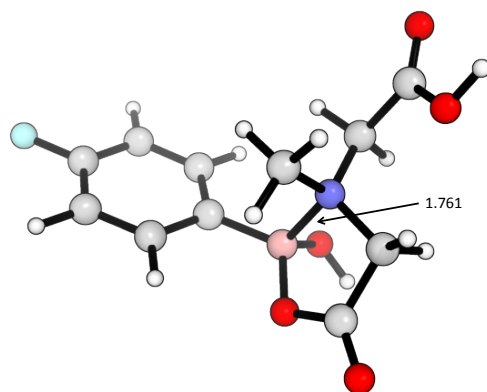

**Figure 44.** The lowest energy conformation structure of **15** optimized at Level 1. Distances are shown in Å.

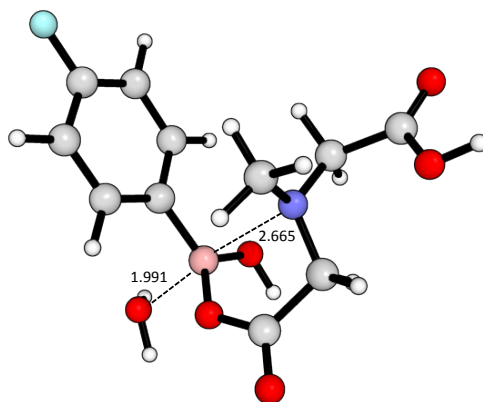

**Figure 45.** The structure of **TS-16** optimized at Level 1. Distances are shown in Å.

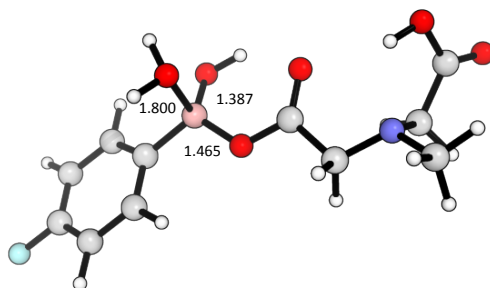

**Figure 46.** The structure of **17** optimized at Level 1. Distances are shown in Å.

The amine in **17** is then able to act as an intramolecular base in **TS-18** which yields the intermediate **19** which, like **13**, has a boron ate complex with a protonated amine poised to stabilize the carboxylate during B-O cleavage in transition state **TS-20**. It is unsurprising that the breaking B-O bond distance in **TS-20** is very similar to that in the equivalent transition state **TS-14** for cleavage of the B-O bond following the first water addition-proton transfer. Transition state **TS-20** leads to the boronic acid **2a** and the diacid **3** in zwitterionic form.

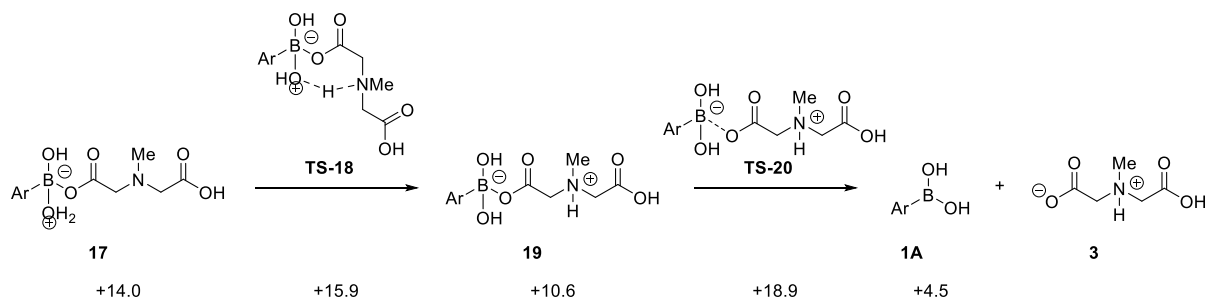

**Figure 47.** The steps linking the product of the second water addition (**17**) with final hydrolysis products. Free energies in kcal/mol relative to initial reactants computed at Level 1A are shown.

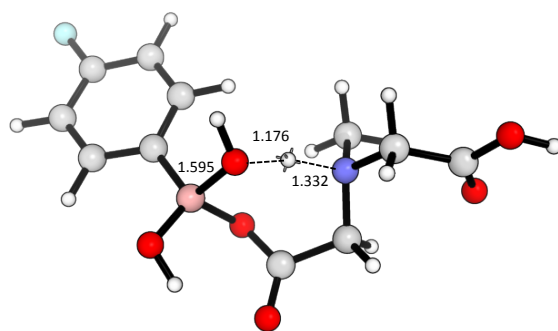

**Figure 48.** The structure of **TS-18** optimized at Level 1. Distances are shown in Å.

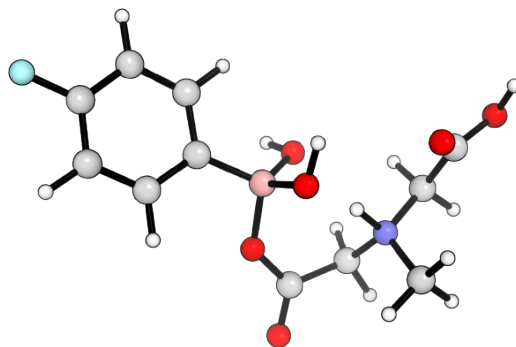

**Figure 49.** The lowest energy conformation structure of **19** optimized at Level 1. Distances are shown in Å.

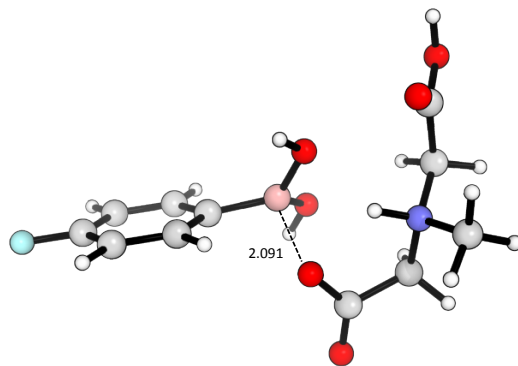

**Figure 50.** The structure of TS-20 optimized at Level 1. Distances are shown in Å.

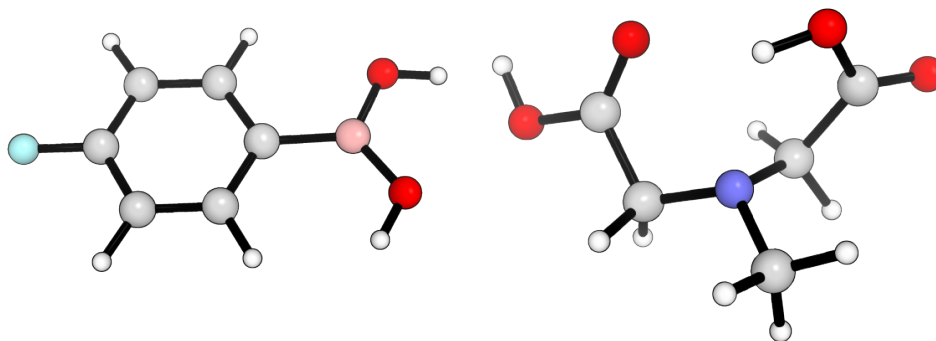

**Figure 51.** The structure of the overall products of the reaction, **2a** and **3** optimized at Level 1.

The later steps of this process (from TS-17 onwards) are found to all involve structures that are rather lower in energy than the previous steps (but still high compared to reactants or products) and each individual step is low barrier suggesting that none of the intermediates would be predicted to be observed in appreciable quantities or to have particularly long lifetimes.

Having established a plausible mechanism, its ability to quantitatively rationalize the experimental observations was explored.

### **9. The order with respect to water**

Modelling water remains one of the most challenging problems for computational chemistry, particularly for bulk water. The kinetics experiments were performed at a range of concentrations of water in THF in which the observed dependency can be rationalized as arising from the reaction of the MIDA with clusters of water. In calculations to study this, the sampling of cluster size, conformation and mechanistic alternatives is challenging and thus the calculations presented are not anticipated to have been exhaustive. The intention is to demonstrate that a



single water molecules or clusters of two or three water molecules can all contribute to the observed reactivity. The enthalpic benefits of including an extra water molecule must offset the entropic costs.

The transition state for the reaction with a single water molecule, **TS-12** was optimized at several different levels of theory. Two levels of theory in particular are presented in Figure 52. Level 1 and Level 2 (geometries are the same for all variations of Levels 1 and 2). Two variations of reaction with water dimers were discovered, involving transition states **TS-25** and **TS-26**. These were also reoptimized at several levels of theory and again Levels 1 and 2 are summarized in Figure 53. Finally, some reactions with trimers of water were considered and again were investigated with several levels of theory. Only Levels 1 is shown in Figure 54 (Level 2 is excluded for reasons discussed below). The energy ordering of the different structures that incorporate dimers and trimers depends upon the level of theory.

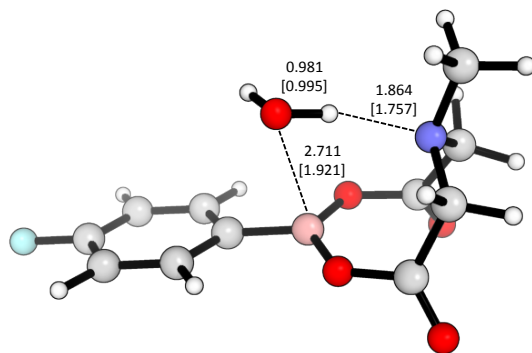

**Figure 52.** Structures of transition states for the reaction of **1a** with a single water molecule. Distances are shown in Å for Level 1, with equivalent distances for Level 2 in brackets.

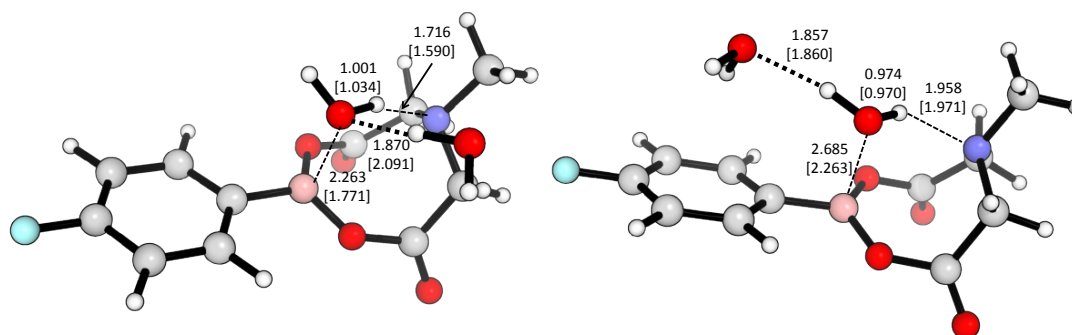

**Figure 53.** Structures of transition states for the reaction of **1a** with water dimers. Distances are shown in Å for Level 1, with equivalent distances for Level 2 in brackets.

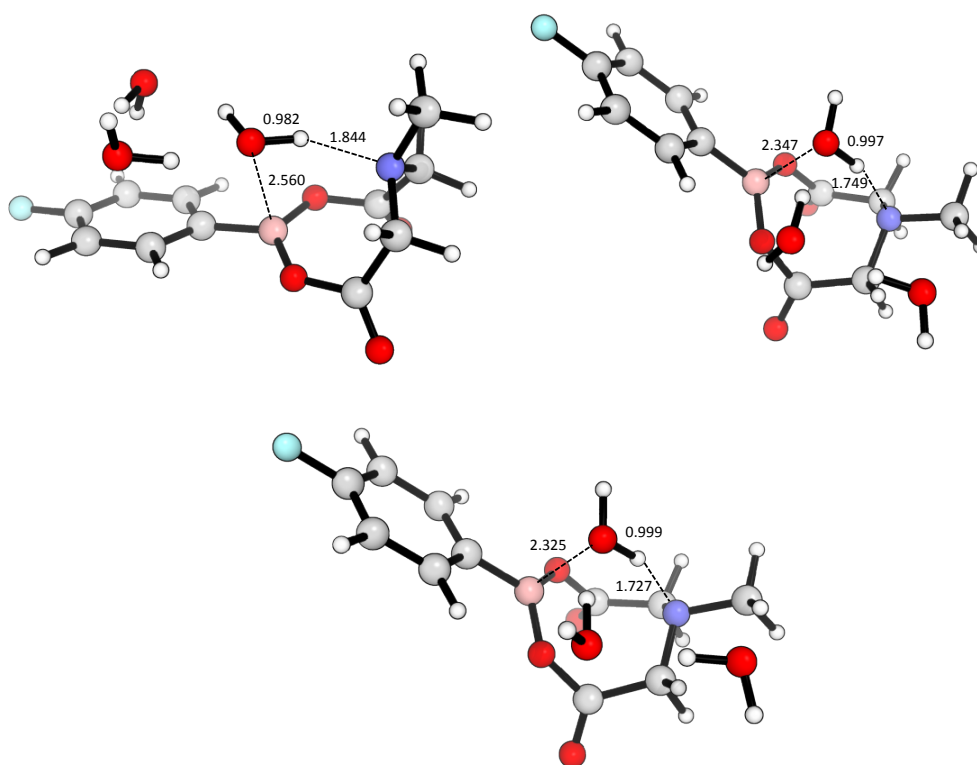

**Figure 54.** Structures of transition states for the reaction of **1a** with water trimers. Distances are shown in Å for Level 1. The lowest energy structure is shown top left, the next lowest top right and the third lowest at the bottom.

The relative energy of the transition states for reaction with dimers and trimers is summarized with the computed activation free energies computed at a range of levels of theory in Table 20. These calculations reveal that the lowest energy structure for the reaction with water dimers and trimers changes depending on the polarity of the solvent as does the energy difference between the reaction with different numbers of water molecules. When corrections to 1 M water for Level 1 (Level 1B) or 9 M water are included for Level 2 (Level 2C), the computed reaction barriers for all three water cluster types come close in energy.

These energies can be contrasted with the free energy changes computed for bringing together two or three water molecules, which are shown in Table 21. It may be more relevant to the experimental situation to consider the barriers for the reaction with water dimers or trimers themselves rather than the barriers computed assuming the water begins as a monomeric species. These free energy barriers are shown in Table 22. This reveals that in the circumstance where equal concentrations of monomeric, dimeric and trimeric water clusters are present, the free energy barrier for the reaction between those clusters and **1a** would be expected to be approximately the same. Presumably, larger clusters would also be able to participate in a similar fashion and the calculations are consistent with a non-integer order with respect to water in which reactivity would be intimately linked to the organization of the water molecules that is

present in solution. The calculations also provide estimates of the entropy change for each step. When considered relative to monomeric, dimeric and trimeric water the corresponding values of  $\Delta S^\ddagger$  are -26.3, -29.8 and -36.2 cal K<sup>-1</sup> mol<sup>-1</sup>. These are more negative than found experimentally but are consistent. By contrast for the dissociative mechanism via **23** discussed below, a value of +5.1 cal K<sup>-1</sup> mol<sup>-1</sup> is computed.

| Level | Lowest free energy barrier with 1 water molecule (kcal/mol) | Lowest free energy barrier with 2 water molecules (kcal/mol) | Lowest free energy barrier with 3 water molecules (kcal/mol) |
|-------|-------------------------------------------------------------|--------------------------------------------------------------|--------------------------------------------------------------|
| 1A    | 25.7                                                        | 27.1                                                         | 27.9                                                         |
| 1B    | 23.6                                                        | 23.1                                                         | 21.9                                                         |
| 2A    | 29.0 (30.1)                                                 | 32.1 (34.2)                                                  | 37.1 (39.9)                                                  |
| 2B    | 27.0 (28.1)                                                 | 28.3 (30.2)                                                  | 25.7 (27.6)                                                  |
| 2C    | 25.7 (26.8)                                                 | 25.7 (28.0)                                                  | 27.3 (30.1)                                                  |
| 3     |                                                             | 32.7 (40.3)                                                  | 37.0 (46.8)                                                  |

**Table 20.** Free energies of transition states for reaction with 1, 2 or 3 water molecules. These are relative to reactant **1a** and 1, 2 or 3 water molecules computed separately.

| Level | Lowest free energy change between 2 isolated water molecules and a water dimer (kcal/mol) | Lowest free energy change between 3 isolated water molecules and a water trimer (kcal/mol) |
|-------|-------------------------------------------------------------------------------------------|--------------------------------------------------------------------------------------------|
| 1A    | +2.8                                                                                      | +2.5                                                                                       |
| 2A    | 3.5 (3.9)                                                                                 | 7.7 (9.0)                                                                                  |
| 2B    | 1.6 (2.0)                                                                                 | 3.8 (5.0)                                                                                  |
| 2C    | -1.0 (-0.6)                                                                               | -0.1 (1.2)                                                                                 |

**Table 21.** Free energies of association of 2 or 3 water molecules forming dimers or trimers.

| Level | Lowest free energy barrier with 1 water molecule (kcal/mol) | Lowest free energy barrier with a water dimer (kcal/mol) | Lowest free energy barrier with a water trimer (kcal/mol) |
|-------|-------------------------------------------------------------|----------------------------------------------------------|-----------------------------------------------------------|
| 1A    | 25.7                                                        | 24.3                                                     | 25.4                                                      |
| 2A    | 29.0 (30.1)                                                 | 28.6 (30.3)                                              | 29.4 (31.0)                                               |
| 2B    | 27.0 (28.1)                                                 | 26.7 (28.2)                                              | 27.3 (28.9)                                               |

**Table 22.** Free energies of transition states for reaction with 1, 2 or 3 water molecules. These are relative to reactant **1a** and monomeric, dimeric and trimeric water.

## 10. Kinetic isotope effects

Kinetic isotope effects are very sensitive to the geometry of the transition state. As can be seen in Figures 52, 53, 54, the bond making and breaking distances vary as the number of water molecules and the level of theory is changed. Thus, a range of levels of theory has been explored. Kinetic isotope effects have been computed by computing free energies of activation and then comparing them and assuming that  $k_1/k_2 = e^{(\Delta G_2^\ddagger - \Delta G_1^\ddagger)/RT}$ . Thermodynamic properties were computed at 294 K and 1 atm. The hydrogen isotope effects were computed for isotope exchange of the hydrogen that is being transferred to nitrogen (1) and for the other hydrogen in the same water molecule (2) separately and then for both being exchanged for deuterium. These were computed for the reaction with one, two and three water molecules. In reactions with dimers of water, the other water molecule was maintained as H<sub>2</sub>O. Isotope effects for the reaction with a single water molecule are in Table 23 and for the reaction with two water molecules in Table 24.

| Level         | $k_H/k_D(1)$ | $k_H/k_D(2)$ | $k_H/k_D(\text{both})$ | $^{10/11}k_B$ | $^{14/15}k_N$ | $^{12/13}k_C$ |
|---------------|--------------|--------------|------------------------|---------------|---------------|---------------|
| 1B            | 1.06         | 0.88         | 0.93                   | 0.998         | 1.011         | 1.005         |
| 2B            | 1.03         | 0.92         | 0.88                   | 1.023         | 1.011         | 1.005         |
| M06/6-31+G*   | 0.92         | 0.91         | 0.84                   | 1.018         | 1.011         | 1.004         |
| M06L/6-31+G*  | 0.91         | 0.90         | 0.84                   | 1.018         | 1.009         | 1.004         |
| M062X/6-31+G* | 0.94         | 0.89         | 0.84                   | 1.018         | 1.009         | 0.995         |
| BP86/6-31+G*  | 0.99         | 0.91         | 0.91                   | 0.996         | 1.009         | 1.005         |
| PBE0/6-31+G*  | 0.99         | 0.92         | 0.91                   | 0.995         | 1.011         | 1.006         |

**Table 23.** Kinetic isotope effects computed for the mechanism with one water molecule.

| Level         | $k_H/k_D(1)$ | $k_H/k_D(2)$ | $k_H/k_D(\text{both})$ | $^{10/11}k_B$ | $^{14/15}k_N$ | $^{12/13}k_C$ |
|---------------|--------------|--------------|------------------------|---------------|---------------|---------------|
| 1B            | 0.98         | 0.94         | 0.93                   | 1.017         | 1.013         | 1.005         |
| 2B            | 1.42         | 0.90         | 1.17                   | 1.026         | 1.009         | 1.004         |
| M06/6-31+G*   | 1.06         | 0.91         | 0.98                   | 1.027         | 1.010         | 1.004         |
| M06L/6-31+G*  | 1.11         | 0.90         | 1.02                   | 1.028         | 1.009         | 1.004         |
| M062X/6-31+G* | 0.97         | 0.92         | 0.90                   | 1.027         | 1.011         | 1.003         |
| BP86/6-31+G*  | 1.09         | 0.95         | 1.05                   | 1.014         | 1.006         | 1.005         |
| PBE0/6-31+G*  | 1.07         | 0.95         | 1.03                   | 1.019         | 1.009         | 1.006         |
| BPW91/6-31+G* | 1.07         | 0.94         | 1.02                   | 1.015         | 1.006         | 1.005         |
| BLYP/6-31+G*  | 1.21         | 0.91         | 1.12                   | 1.020         | 1.005         | 1.004         |
| B3LYP/6-31+G* | 1.05         | 0.90         | 0.96                   | 1.022         | 1.006         | 1.005         |

|                  |      |      |      |       |       |       |
|------------------|------|------|------|-------|-------|-------|
| OLYP/6-31+G*     | 1.01 | 0.90 | 0.92 | 1.016 | 1.008 | 1.005 |
| M06L/6-311++G**  | 1.27 | 0.90 | 1.17 | 1.027 | 1.010 | 1.005 |
| B3LYP/6-311++G** | 1.13 | 0.90 | 1.04 | 1.023 | 1.009 | 1.005 |
| BLYP/6-311++G**  | 1.33 | 0.91 | 1.24 | 1.022 | 1.005 | 1.005 |
| BP86/6-311++G**  | 1.17 | 0.95 | 1.13 | 1.017 | 1.008 | 1.005 |
| M06/6-311++G**   | 1.13 | 0.91 | 1.05 | 1.028 | 1.009 | 1.004 |
| OLYP/6-311++G**  | 1.07 | 0.92 | 0.99 | 1.018 | 1.006 | 1.005 |
| M06L/ccpvdz      | 1.11 | 0.90 | 1.03 | 1.024 | 1.010 | 1.004 |

**Table 24.** Kinetic isotope effects computed for the mechanism with two water molecules.

The hydrogen isotope effects show that there is generally one KIE that is approximately 0.9 while the other is computed to range from 0.91 to 1.06 for the reaction with one water molecule and from 0.98 to 1.42 for the reaction with two water molecules. The reaction that is occurring is an addition of water to the boron atom in the cleaving B-N bond concerted with a proton transfer to nitrogen. The addition of water to the boron would be expected to show a secondary isotope effect and presumably the value of  $\sim 0.9$  corresponds to the isotope effect for this process. The proton transfer would be expected to entail a primary isotope effect. Therefore, the net value of the KIE would be expected to depend upon the extent of B-O bond formation: a long B-O distance would suggest a transition state most like that for B-O addition while a short B-O distance would suggest a transition state more like that for proton transfer.

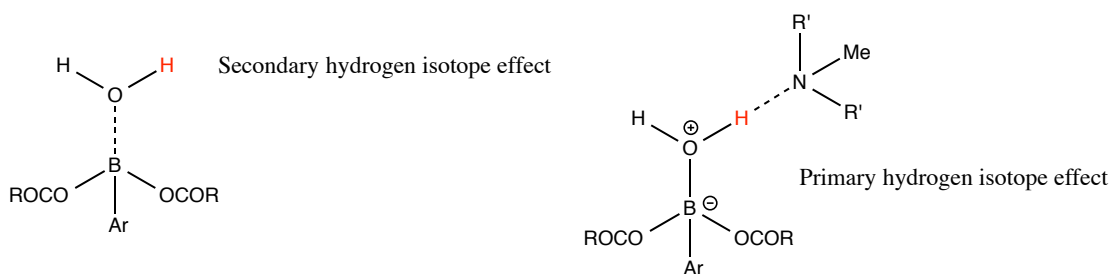

**Figure 55.** The two processes contributing to the rate-limiting step and the KIEs expected for each.

The boron isotope effect also depends upon the B-O distance in the transition state, as shown in Figure 56. The KIEs computed at the levels of theory shown in Tables 23 and 24 are plotted against the B-O distance in the optimized transition state geometry at that level. This reveals that the observed boron isotope effect of 1.032 is consistent with a B-O distance of approximately 1.70 Å. At this B-O distance the hydrogen isotope effect would be expected to be elevated with a

contribution from the proton transfer part of the process. This is consistent with the observed value of 1.59.

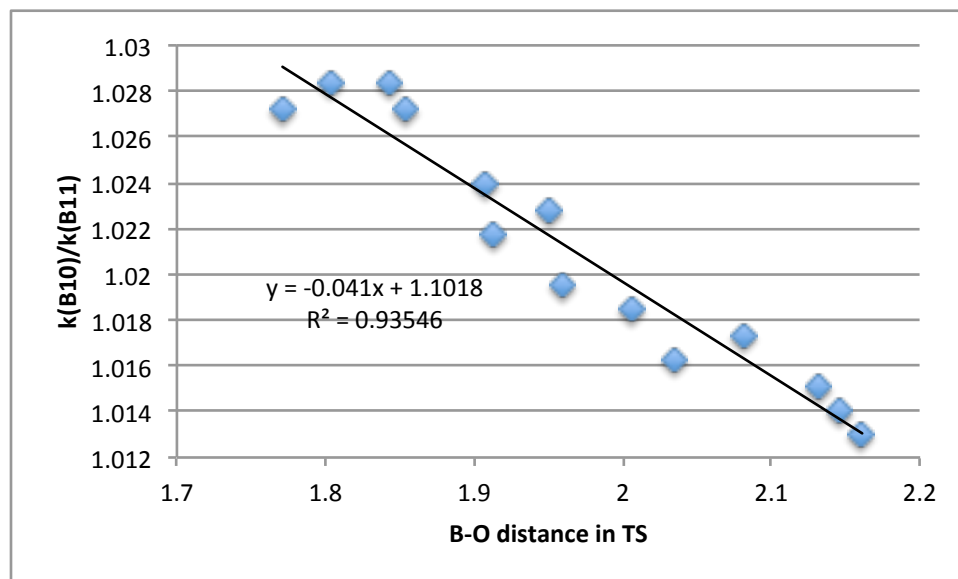

**Figure 56.** The interdependence of the boron isotope effect ( $^{10/11}k_B$ ) and the B-O distance in the transition state.

Quantitative analysis of the isotope effects is complicated by the experimental and computational suggestion that the reaction proceeds with a variable number of water molecules involved. The equilibrium amount of water dimers, trimers etc would also depend upon the isotopic composition. A further complication is that the primary isotope effect would be increased by tunneling. No attempt to correct for this has been made but with these considerations in mind, the KIEs computed at level 2 B with two water molecules are considered to be in qualitative agreement and to provide a clear rationale for the observed values. Boron-oxygen bond formation is sufficiently advanced in the transition state for proton transfer to make a contribution and give an increased KIE for the hydrogen isotopes and to engage the nitrogen atom sufficiently to lead to a nitrogen isotope effect. The B-O engagement also leads to a significant boron isotope effect. The proton transfer is likely larger than that found in any of the computed transition states because none of them provide a nitrogen isotope effect as large as that observed (1.017). The computed carbon isotope effect is consistently about 1.005, which is larger than is observed experimentally. This isotope effect presumably arises because of the change in geometry around the carbonyl. As shown in Figure 55, the angle at the carbonyl is contracted in the MIDA reactant. This may be a result of the modelling employing gas phase or implicit solvation; interaction between real solvent molecules (THF or water) as weak Lewis bases with the Lewis acidic boron will presumably extend the B-N bond and reduce this effect. It may also be a factor in the nitrogen isotope effect.

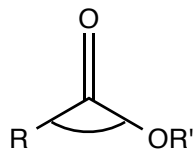

Reactant: 110°  
 One water TS: 117°  
 Two water TS: 118°

**Figure 57.** The C-C-O angle in structures of the reactant and transition states optimized at Level 1.

### 11. Hammett relationship

The best agreement with the kinetic isotope effects was found for level 2B. This level was then applied to derive the effect of substituents on rates for the various mechanisms. The substituents studied computationally were H, *p*-Me, *p*-CF<sub>3</sub>, and *m*-NO<sub>2</sub> alongside the originally studied *p*-F. For this set, the relative rates were computed assuming that  $\log(k_{\text{rel}}) = \log(e^{-(\text{Gact}(X) - \text{Gact}(H))/RT})$ . These are plotted against the sigma values in Figure 58. For the reaction with one water molecule, a  $\rho$  value of 0.4 was computed and for the reaction with two water molecules a value of 1.0 was found. The origin of the observed value of  $\rho$  can also be rationalized by considering the two contributing reactions illustrated in Figure 38. If B-O bond formation is significant in the transition state, then the boron atom will be more like that shown to the right for the proton transfer step and will bear a negative charge. This would explain why electron-withdrawing groups are better able to stabilize the transition state and hence promote a faster reaction.

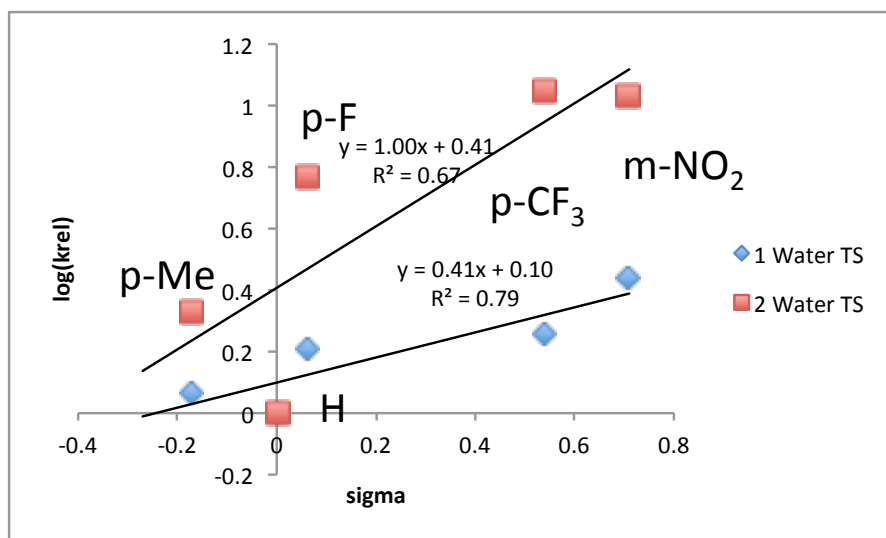

**Figure 58.** Hammett plots of computed relative rate versus sigma values.

When the calculations were extended to the reaction with three water molecules, the linear relationship broke down. Further investigation revealed that when there is an electron donating substituent at the para position, the trimer of water is large enough to reach over and form a polar

interaction with the adjacent carbon atom (Figure 59); this is a consequence of gas phase or implicit calculation. In reality, the water molecules would interact with the surrounding solvent (the lone pairs of THF or of water).

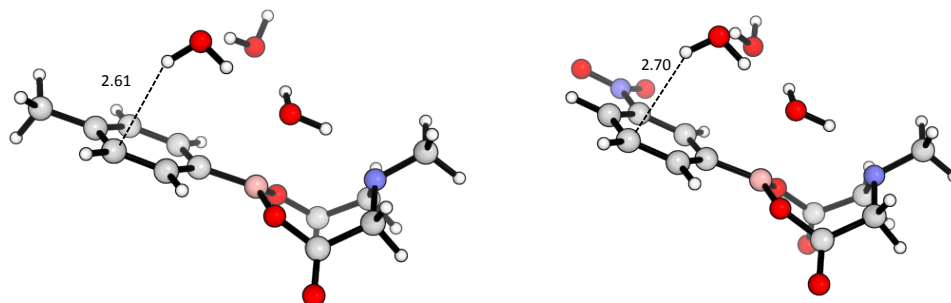

**Figure 59.** The unrealistic interaction between one of the water molecules in a water trimer in the transition state for the reaction with *p*-Me substituted MIDA which is not observed in the *m*-NO<sub>2</sub> equivalent. The effect is revealed by the C<sub>ortho</sub>-H distance (shown in Å).

## 12. S<sub>N</sub>1 via monocyclic intermediate

The ring-opened intermediate ("open-1a") was studied at Levels 1 and 2 which place it at 27-29 kcal/mol above the reactant. Experimentally, the barrier for the dissociative process is found to be >30 kcal/mol (see section IX above) which is consistent with the energies found for the intermediate and a small free energy barrier of 2-4 kcal/mol for reassociation of the B-N bond.

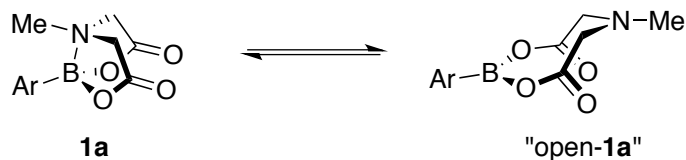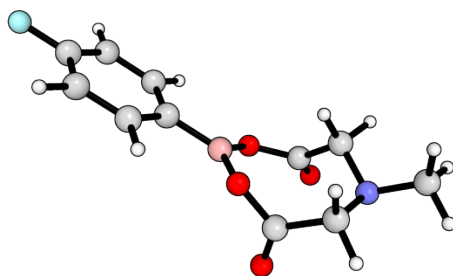

**Figure 60.** The lowest energy conformation of "open-1a".



---

| Level | Lowest free energy of "open"-1a compared to 1a (kcal/mol) |
|-------|-----------------------------------------------------------|
| 1A    | 29.0                                                      |
| 2A    | 26.9 (28.0)                                               |
| 2B    | 26.9 (28.0)                                               |
| 2C    | 26.9 (28.0)                                               |

---

**Table 25.** Free energies of open-chain  $S_N1$  intermediate **1a** compared to "open-1a".

### 13. Backside-B- $S_N2$ Attack (*anti* to N)

The initial backside attack by a water molecule to cleave the B-N bond leads, via TS-32, to intermediate **33**. The geometry and energetics for this mechanism are affected by the level of theory employed. Level 1, which includes solvation in the geometry optimization, yields an intermediate, **33**, in which the nitrogen is held in proximity to the boron while Levels 2 and 3 require nitrogen inversion and hence the nitrogen is more remote. The energies computed for **33** suggest that it is at least 30 kcal/mol above reactants and hence the barrier to reach it must be at least this high. This would exclude this process from any significant contribution to the neutral hydrolysis reaction. The lower energy for **33** found by Level 1 is presumed to be an artifact of the continuum solvation model.

Two mechanisms were identified for the subsequent cleavage of the B-OCO bond in **33**, and both involve deprotonation of the B-bound water molecule. This process involves B-O<sub>water</sub> bond forming and B-OCO bond breaking while the carboxylate acts as an intramolecular base. This is analogous to a mechanism proposed for the protodeboronation of boronic acids.<sup>9</sup>

The first involves the carboxylate deprotonating the water molecule as the B-OCO bond cleaves, with two types of transition structure identified for this: TS-34 where one water molecule acts in a four-membered transition structure and TS-35 where two water molecules act in an eight-membered transition structure. Both (TS-34 and TS-35) are at high free energies (at least 36 kcal/mol above reactant). This process yields acyclic intermediate **36** but the lowest energy conformation of this structure involves reformation of a B-N bond. The hydrolysis of **36** is shared with the front side attack and is described above. The highest point along the whole "backside-B-SN2-attack" pathway (from **1a** and H<sub>2</sub>O) is for the B-O cleavage step (converting **33** to **36**) with TS-35 the lowest free energy transition state for this step. Most levels of theory suggest that the barrier for this process is significantly higher than the process passing through the "front side" transition state TS-12 or through the open chain intermediate "open-1a". The kinetic isotope effects computed for reaction via TS-35 at two levels of theory are shown in Table 26. These reveal that this process should be marked by a large primary isotope effect for the transferring hydrogen with an overall effect for exchanging H<sub>2</sub>O and D<sub>2</sub>O resulting in  $kH/kD \sim 3.8$ . This is inconsistent with the observed values. This, alongside the energetics (other than for

Level 1, which has artifacts from the continuum solvation model), suggests that this mechanism is not a dominant one.

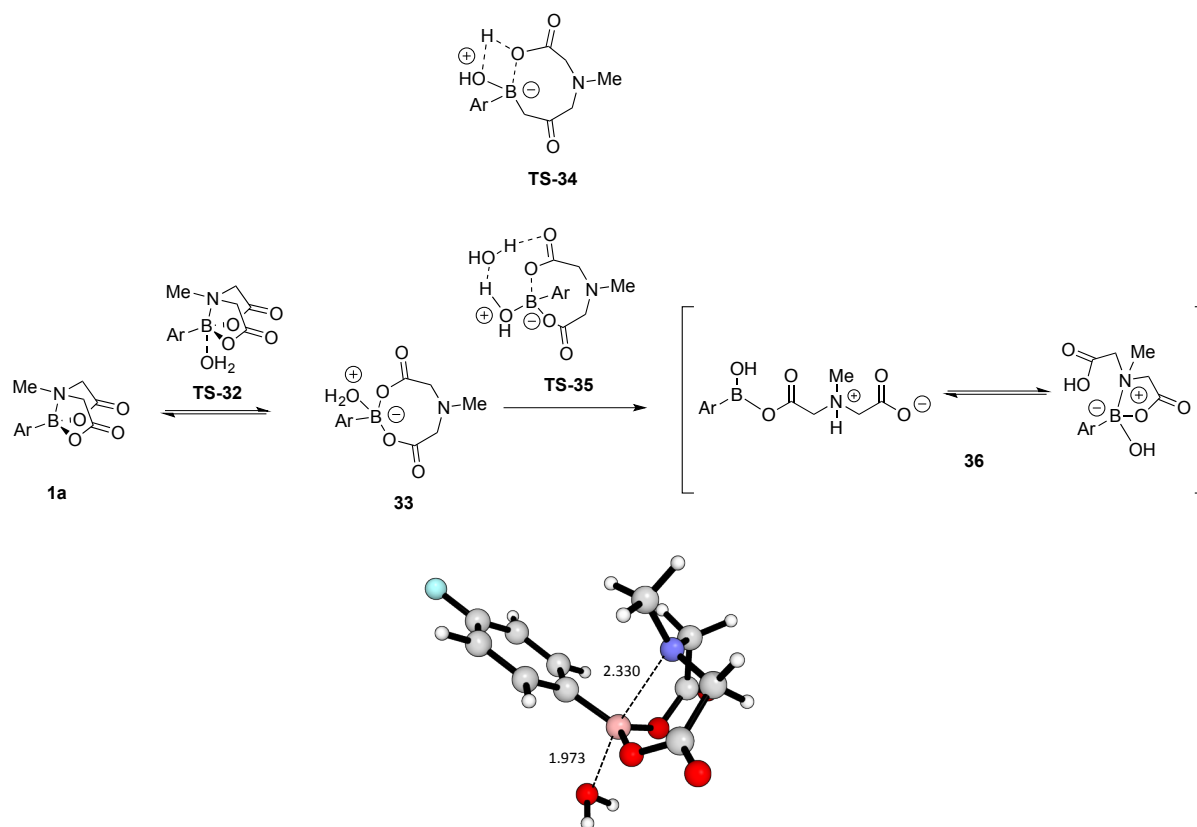

**Figure 61.** The structure of TS-32 optimized at Level 1.

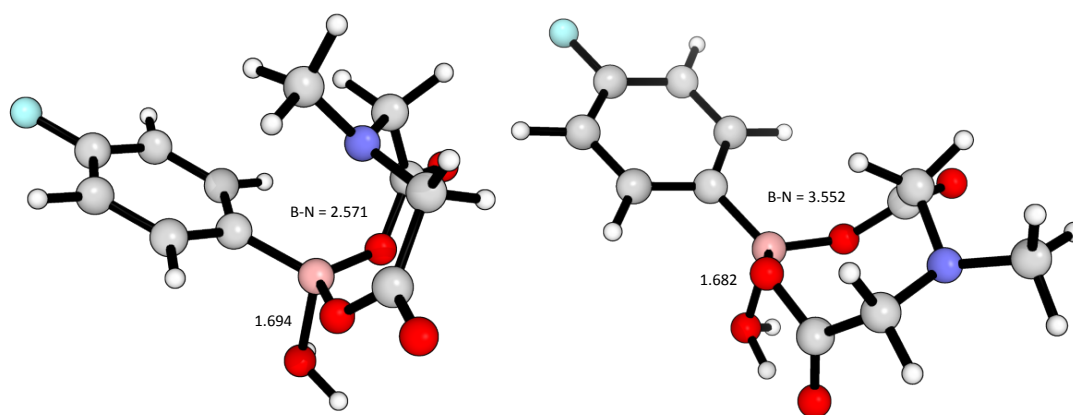

**Figure 62.** The lowest energy conformation of 33 optimized at Level 1 (left hand side) and at Level 2 (right hand side). Distances are given in Å.

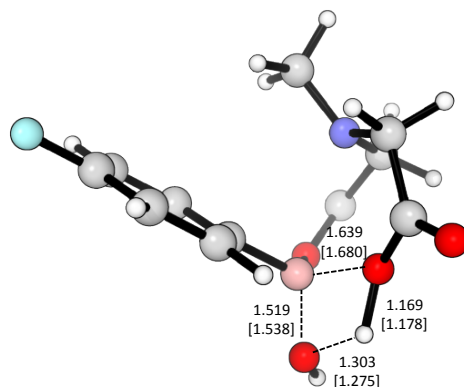

**Figure 63.** The lowest energy conformation of TS-34 optimized at Level 1. Distances are given in Å for Level 1 with equivalent distances for Level 2 in brackets.

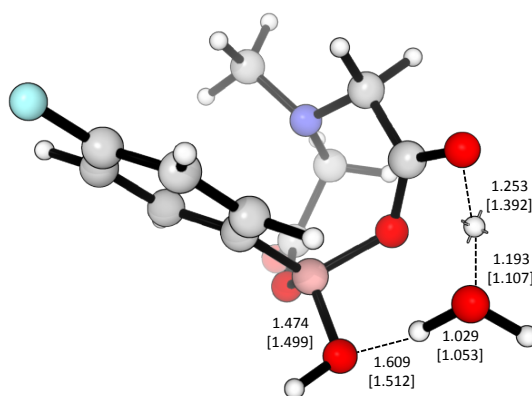

**Figure 64.** The lowest energy conformation of TS-35 optimized at Level 1. Distances are given in Å for Level 1 with equivalent distances for Level 2 in brackets.

| Level               | Lowest free energy conformation of TS-32 (kcal/mol) | Lowest free energy conformation of 33 (kcal/mol) | Lowest free energy conformation of TS-34 (kcal/mol) | Lowest free energy conformation of TS-35 (kcal/mol) |
|---------------------|-----------------------------------------------------|--------------------------------------------------|-----------------------------------------------------|-----------------------------------------------------|
| 1A                  | 20.9                                                | 20.5                                             | 41.0                                                | 21.4                                                |
| 2A                  |                                                     | 32.8 (34.7)                                      | 47.6 (49.4)                                         | 36.7 (38.5)                                         |
| 3                   |                                                     | 30.5 (35.2)                                      | 46.3 (49.8)                                         | 36.3 (43.1)                                         |
| B3LYP/6-31+G*(+PCM) |                                                     | 30.2 (34.8)                                      | 48.0 (51.6)                                         | 38.9 (45.8)                                         |

**Table 25.** Free energies of transition states and minima for the “back side” reaction with 1 or 2 water molecules. These are relative to reactant **1a** and 1 or 2 water molecules computed separately.

---

| Level | $k_H/k_D(1)$ | $k_H/k_D(2)$ | $k_H/k_D(4 \times D)$ | $^{10/11}k_B$ | $^{14/15}k_N$ | $^{12/13}k_C$ |
|-------|--------------|--------------|-----------------------|---------------|---------------|---------------|
| 1B    | 4.15, 1.10   | 0.90, 0.89   | 3.79                  | 1.010         | 1.015         | 1.001         |
| 2B    | 3.19, 1.45   | 0.87, 0.92   | 3.82                  | 1.011         | 1.010         | 1.001         |

**Table 26.** Kinetic isotope effects computed for a process involving **TS-35** as rate-limiting transition state.

The second possibility for hydrolysis via "backside-B-SN2-attack" involves the reversibly formed monocyclic intermediate **32** undergoing conformational changes until the nitrogen can act as a base to deprotonate the B-bound water. This would ultimately entail passing through transition state **TS-12** and would thus be kinetically indistinguishable from the "frontside-B-SN2-attack" process identified as the favourable pathway. However, the high energy of intermediate **33** (> 30 kcal/mol according to the majority of levels of theory employed) makes direct access to **TS-12** via front side attack by far the most likely pathway from reactants to products.

#### XIV - References

- 1) Gottlieb, H. E., Kotlyar, V., & Nudelman, A. NMR chemical shifts of common laboratory solvents as trace impurities. *J. Org. Chem.* **62**, 7512-7515 (1997).
- 2) Dhakane, V. D., Chavan, H. V., Thakare, V. N., Adsul, L. K., Shringare, S. N., & Bandgar, B. P. Novel ibuprofen prodrugs with improved pharmacokinetics and non-ulcerogenic potential. *Med. Chem. Res.* **23**, 503-517 (2014).
- 3) Ochiai, M., Munetaka, K., Tani, S., & Nagao, Y. Generation of [b-(phenylsulfonyl)alkylidene] carbenes from hypervalent alkenyl- and alkynyliodonium tetrafluoroborates and synthesis of 1-(phenylsulfonyl)cyclopentenes. *J. Am. Chem. Soc.* **113**, 3135-3142 (1991).
- 4) Schultz, M., Kulis, J., Murison, J.; Andrews, G.W. Synthesis of dianionic and trianionic, chelating ligand based on amino acids. *Aust. J. Chem.* **61**, 297-302 (2008).
- 5) Butters, M., Harvey, J. B., Jover, J., Lennox, A. J. J., Lloyd-Jones, G. C., & Murray, P. M. Aryl trifluoroborates in Suzuki–Miyaura coupling: the roles of endogenous aryl boronic acid and fluoride. *Angew. Chem. Int. Ed.* **49**, 5156-5160 (2010).
- 6) Treiner, C., Bocquet, J.-F., & Chemla, M. Seconds coefficients du viriel des melanges eau-tetrahydrofurane (THF) influence sur les coefficients d'activite de l'eau et du THF a 25 °C. *J. Chim. Phys.-Chim. Biol.* **70**, 72–79 (1973).
- 7) Gaussian 09, Revision E.01, M. J. Frisch, G. W. Trucks, H. B. Schlegel, G. E. Scuseria, M. A. Robb, J. R. Cheeseman, G. Scalmani, V. Barone, B. Mennucci, G. A. Petersson, H. Nakatsuji, M. Caricato, X. Li, H. P. Hratchian, A. F. Izmaylov, J. Bloino, G. Zheng, J. L. Sonnenberg, M. Hada, M. Ehara, K. Toyota, R. Fukuda, J. Hasegawa, M. Ishida, T. Nakajima, Y. Honda, O. Kitao, H. Nakai, T. Vreven, J. A. Montgomery, Jr., J. E. Peralta, F. Ogliaro, M. Bearpark, J. J. Heyd, E. Brothers, K. N. Kudin, V. N. Staroverov, R. Kobayashi, J. Normand, K. Raghavachari, A. Rendell, J. C. Burant, S. S. Iyengar, J. Tomasi, M. Cossi, N. Rega, J. M. Millam, M. Klene, J. E. Knox, J. B. Cross, V. Bakken, C. Adamo, J. Jaramillo, R. Gomperts, R. E. Stratmann, O. Yazyev, A. J. Austin, R. Cammi, C. Pomelli, J. W. Ochterski, R. L. Martin, K. Morokuma, V. G. Zakrzewski, G. A. Voth, P. Salvador, J. J. Dannenberg, S. Dapprich, A. D. Daniels, Ö. Farkas, J. B. Foresman, J. V. Ortiz, J. Cioslowski, and D. J. Fox, Gaussian, Inc., Wallingford CT, 2009..
8. Gaussian 03, Revision C.02, M. J. Frisch, G. W. Trucks, H. B. Schlegel, G. E. Scuseria, M. A. Robb, J. R. Cheeseman, J. A. Montgomery, Jr., T. Vreven, K. N. Kudin, J. C. Burant, J. M. Millam, S. S. Iyengar, J. Tomasi, V. Barone, B. Mennucci, M. Cossi, G. Scalmani, N. Rega, G. A. Petersson, H. Nakatsuji, M. Hada, M. Ehara, K. Toyota, R. Fukuda, J. Hasegawa, M. Ishida, T. Nakajima, Y. Honda, O. Kitao, H. Nakai, M. Klene, X. Li, J. E. Knox, H. P. Hratchian, J. B. Cross, V. Bakken, C. Adamo, J. Jaramillo, R. Gomperts, R. E. Stratmann, O. Yazyev, A. J. Austin, R. Cammi, C. Pomelli, J. W. Ochterski, P. Y. Ayala, K. Morokuma, G. A. Voth, P. Salvador, J. J. Dannenberg, V. G. Zakrzewski, S. Dapprich, A. D. Daniels, M. C. Strain, O. Farkas, D. K. Malick, A. D. Rabuck, K. Raghavachari, J. B. Foresman, J. V. Ortiz, Q. Cui, A. G. Baboul, S. Clifford, J. Cioslowski, B. B. Stefanov, G. Liu, A. Liashenko, P. Piskorz, I. Komaromi, R. L. Martin, D. J. Fox, T. Keith, M. A. Al-Laham, C. Y. Peng, A. Nanayakkara, M. Challacombe, P. M. W. Gill, B. Johnson, W. Chen, M. W. Wong, C. Gonzalez, and J. A. Pople, Gaussian, Inc., Wallingford CT, 2004.
9. Noonan, G. & Leach, A. G. A mechanistic proposal for the protodeboronation of neat boronic acids: boronic acid mediated reaction in the solid state. *Organic & biomolecular chemistry* **13**, 2555-2560 (2015).
